# Supplementary material for: Pulmonary hypertension and home-based (PHAHB) exercise intervention: protocol for a feasibility study
Source: PubMed Central journal article supplement — BMJ Open. 2021 May 10;11(5):e045460. doi: 10.1136/bmjopen-2020-045460 (PMC8112432; doi:10.1136/bmjopen-2020-045460), 2021-05-10
Supplement: bmjopen-2020-045460.draft_revisions.pdf [file bmjopen-2020-045460.draft_revisions.pdf]

# BMJ Open

BMJ Open is committed to open peer review. As part of this commitment we make the peer review history of every article we publish publicly available.

When an article is published we post the peer reviewers' comments and the authors' responses online. We also post the versions of the paper that were used during peer review. These are the versions that the peer review comments apply to.

The versions of the paper that follow are the versions that were submitted during the peer review process. They are not the versions of record or the final published versions. They should not be cited or distributed as the published version of this manuscript.

BMJ Open is an open access journal and the full, final, typeset and author-corrected version of record of the manuscript is available on our site with no access controls, subscription charges or pay-per-view fees (<http://bmjopen.bmj.com>).

If you have any questions on BMJ Open's open peer review process please email [info.bmjopen@bmj.com](mailto:info.bmjopen@bmj.com)

# BMJ Open

## The Pulmonary Hypertension And Home-Based (PHAHB) Exercise Intervention: Protocol for a Feasibility Trial

|                               |                                                                                                                                                                                                                                                                                                                                                                                                                                                                                                                                                                                                                                               |
|-------------------------------|-----------------------------------------------------------------------------------------------------------------------------------------------------------------------------------------------------------------------------------------------------------------------------------------------------------------------------------------------------------------------------------------------------------------------------------------------------------------------------------------------------------------------------------------------------------------------------------------------------------------------------------------------|
| Journal:                      | <i>BMJ Open</i>                                                                                                                                                                                                                                                                                                                                                                                                                                                                                                                                                                                                                               |
| Manuscript ID                 | bmjopen-2020-045460                                                                                                                                                                                                                                                                                                                                                                                                                                                                                                                                                                                                                           |
| Article Type:                 | Protocol                                                                                                                                                                                                                                                                                                                                                                                                                                                                                                                                                                                                                                      |
| Date Submitted by the Author: | 01-Oct-2020                                                                                                                                                                                                                                                                                                                                                                                                                                                                                                                                                                                                                                   |
| Complete List of Authors:     | McCormack, Ciara; Dublin City University, School of Health and Human Performance<br>Kehoe, Brona; Waterford Institute of Technology, Department of Sport & Exercise Science<br>Hardcastle, Sarah; Dublin City University, School of Health and Human Performance; University of Notre Dame, Fremantle, Western Australia, Institute for Health Research<br>McCaffrey, Noel; ExWell Medical<br>Gaine, Sean; Mater Misericordiae University Hospital, Respiratory Department<br>McCullagh, Brian; Mater Misericordiae University Hospital, Respiratory Department<br>Moyna, Niall; Dublin City University, School of Health & Human performance |
| Keywords:                     | REHABILITATION MEDICINE, SPORTS MEDICINE, Respiratory physiology < THORACIC MEDICINE                                                                                                                                                                                                                                                                                                                                                                                                                                                                                                                                                          |
|                               |                                                                                                                                                                                                                                                                                                                                                                                                                                                                                                                                                                                                                                               |

SCHOLARONE™  
Manuscripts

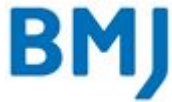

I, the Submitting Author has the right to grant and does grant on behalf of all authors of the Work (as defined in the below author licence), an exclusive licence and/or a non-exclusive licence for contributions from authors who are: i) UK Crown employees; ii) where BMJ has agreed a CC-BY licence shall apply, and/or iii) in accordance with the terms applicable for US Federal Government officers or employees acting as part of their official duties; on a worldwide, perpetual, irrevocable, royalty-free basis to BMJ Publishing Group Ltd ("BMJ") its licensees and where the relevant Journal is co-owned by BMJ to the co-owners of the Journal, to publish the Work in this journal and any other BMJ products and to exploit all rights, as set out in our [licence](#).

The Submitting Author accepts and understands that any supply made under these terms is made by BMJ to the Submitting Author unless you are acting as an employee on behalf of your employer or a postgraduate student of an affiliated institution which is paying any applicable article publishing charge ("APC") for Open Access articles. Where the Submitting Author wishes to make the Work available on an Open Access basis (and intends to pay the relevant APC), the terms of reuse of such Open Access shall be governed by a Creative Commons licence – details of these licences and which [Creative Commons](#) licence will apply to this Work are set out in our licence referred to above.

Other than as permitted in any relevant BMJ Author's Self Archiving Policies, I confirm this Work has not been accepted for publication elsewhere, is not being considered for publication elsewhere and does not duplicate material already published. I confirm all authors consent to publication of this Work and authorise the granting of this licence.

## PHAHB Intervention Protocol

1  
2  
3  
4 1 **The Pulmonary Hypertension And Home-Based (PHAHB) Exercise Intervention:**  
5  
6 2 **Protocol for a Feasibility Trial**  
7  
8

9 3  
10 4 *Ciara McCormack<sup>a\*</sup>, Brona Kehoe<sup>b</sup>, Sarah J. Hardcastle<sup>a,c</sup>, Noel McCaffrey<sup>d</sup>, Sean Gaine<sup>e</sup>,*  
11  
12 5 *Brian McCullagh<sup>e</sup>, Niall Moyna<sup>a</sup>*  
13  
14 6

15  
16  
17 7 <sup>a</sup> School of Health & Human Performance, Dublin City University, Dublin, Ireland.

18  
19 8 <sup>b</sup> Department of Sport & Exercise Science, Waterford Institute of Technology, Waterford City,  
20  
21 9 Ireland.

22  
23  
24 10 <sup>c</sup> Institute for Health Research, University of Notre Dame, Fremantle, Western Australia.

25  
26 11 <sup>d</sup> ExWell Medical, Dublin, Ireland.

27  
28 12 <sup>e</sup> Pulmonary Hypertension Unit, Mater Misericordiae University Hospital Dublin 7, Ireland  
29  
30  
31 13

32  
33 14 \*Ciara McCormack

34  
35 15 Telephone: 01 700 8472

36  
37 16 Email: [Ciara.mccormack26@mail.dcu.ie](mailto:Ciara.mccormack26@mail.dcu.ie)

38  
39  
40 17 *School of Health & Human Performance, Dublin City University, Glasnevin Campus,*  
41  
42 18 *Glasnevin, Dublin 9, Ireland.*

43  
44 19 *Word Count: 3852*  
45  
46  
47 20  
48 21  
49 22  
50 23  
51 24  
52 25  
53  
54  
55  
56  
57  
58  
59  
60

## PHAHB Intervention Protocol

**ABSTRACT**

**Introduction:** Novel therapies for pulmonary hypertension (PH) have improved survival and slowed disease progression. However, patients still present with symptoms of exertional dyspnoea and fatigue, which impacts their ability to perform activities of daily living, reduces exercise tolerance and impairs their quality of life (QoL). Exercise training has shown to be safe and effective at enhancing QoL and physical function in PH patients, yet it remains an under-utilized adjunct therapy. Most exercise training for PH patients has been offered through hospital-based programmes. Home-based exercise programmes provide an alternative model that has the potential to increase the availability and accessibility of exercise training as an adjunct therapy in PH. The purpose of this study is to investigate the feasibility, acceptability, utility and safety of a novel remotely supervised home-based PH exercise programme.

**Methods:** Single arm intervention with a pre/post comparisons design and a follow up maintenance phase will be employed. Eligible participants (n= 25) will be recruited from the Mater Misericordiae University Hospital PH Unit. Participants will undergo a 10-week remote home-based exercise program, with induction training, support materials, telecommunication support and health coaching sessions. The primary outcome measures are feasibility, acceptability, utility and safety of the intervention. Secondary outcomes will include the impact of the intervention on exercise capacity, physical activity levels, strength, health-related quality of life and exercise self-efficacy, assessed at baseline, 10 weeks (post intervention) and 20 weeks (follow up).

**Ethics and dissemination:** Ethics approval has been obtained from the Mater Misericordiae Institutional Review Board REF:1/378/2032 and Dublin City University Research Ethics DCUREC/2018/246. A manuscript of the results will be submitted to a peer-reviewed journal and results will be presented at conferences, community and consumer forums and hospital

## PHAHB Intervention Protocol

1  
2  
3 50 research conferences. Trial Registration: ISRCTN Registry: ISRCTN83783446. Protocol  
4  
5 51 version. 2.0.  
6  
7  
8  
9

10 52 **Keywords:** Pulmonary Hypertension, exercise rehabilitation, physical activity, home-based,  
11  
12 53 remote delivery, wearable technology, health coaching.  
13  
14  
15  
16

17 54 **Strengths and limitations of this study**

- 18  
19  
20 55 • This is the first study to assess the feasibility, utility and acceptability of a novel  
21  
22 56 distance-based exercise intervention for PH patients  
23  
24 57 • The intervention is pragmatic and scalable and could be integrated into existing  
25  
26 58 healthcare pathways.  
27  
28 59 • As PH is a rare disease with a small population size within Ireland, there is a lack of a  
29  
30 60 usual care control group which is a limitation of the study.  
31  
32  
33  
34  
35

36 62 **INTRODUCTION**

37  
38 63 Despite earlier diagnosis and improved pharmaceutical therapies, many PH participants  
39  
40 64 continue to experience exertional symptoms of dyspnoea and fatigue, which leads to a  
41  
42 65 reduction in functional capacity and in turn, quality of life (QoL). Consequently, there is greater  
43  
44 66 recognition for a more holistic approach to PH treatment beyond pharmacological therapies[1].  
45  
46  
47  
48  
49

50 67 Exercise rehabilitation and physical activity (PA) interventions have continuously  
51  
52 68 demonstrated effectiveness as adjuvant therapies for improving exercise capacity and QoL in  
53  
54 69 a spectrum of cardio-pulmonary disorders[2-4]. Although research investigating exercise in  
55  
56 70 PH is an emerging field of study, the body of evidence continues to grow. Recent systematic  
57  
58 71 reviews and meta-analyses have reported improvements in exercise capacity and QoL in PH[6-  
59  
60

## PHAHB Intervention Protocol

1  
2  
3 72 11], which has prompted a renewed focus on exercise training and pulmonary rehabilitation  
4  
5 73 for PH patients.  
6  
7  
8  
9

10 74 In 2015, the European Society of Cardiology /European Respiratory Society published  
11  
12 75 the first guidelines, stating that exercise training should be implemented by specialist PH  
13  
14 76 centres as an adjunct to medical therapy for stable PH participants[12]. Currently, the optimal  
15  
16 77 mode, intensity, and duration of the training and the characteristics of participants most likely  
17  
18 78 to benefit from exercise training remains unknown[13]. To date, the Hiedelberg program in  
19  
20 79 Germany remains the gold standard exercise program in PH. It involves an intensive 3-week  
21  
22 80 in-patient induction phase, with a continued multimodality, monitored outpatient period[14].  
23  
24 81 Despite the proven beneficial outcomes of this program, it is deemed resource intensive to  
25  
26 82 operate and roll out.  
27  
28  
29  
30  
31  
32

33 83 An alternative and pragmatic approach, found to be as effective as a supervised exercise  
34  
35 84 programme in cardiac rehabilitation, is a home-based model[15]. Home-based interventions  
36  
37 85 provide solutions to common barriers to participation in centre-based programs such as access  
38  
39 86 and transport issues, and are less expensive[16]. Further, older adults and patient populations  
40  
41 87 express a preference for unsupervised, self-paced, low-moderate intensity PA, specifically  
42  
43 88 walking[17-18]. Home-based interventions have not been studied extensively in PH. Through  
44  
45 89 the use of telehealth, distance-based programmes could potentially offer an alternative mode  
46  
47 90 of delivery for exercise training to increase adherence, availability and affordability for PH  
48  
49 91 patients.  
50  
51  
52  
53  
54  
55

56 92 Previous exercise interventions in PH have not included strategies to maximise  
57  
58 93 adherence. An evidence-based approach to implement lifestyle changes requires the  
59  
60

## PHAHB Intervention Protocol

1  
2  
3 94 implementation of health behaviour change strategies grounded in health behaviour change  
4  
5 95 theory[19]. Evidence-based behaviour change techniques (BCT's) can be used to improve  
6  
7 96 intervention effectiveness[20]. For example, the combination of the following BCT's: self-  
8  
9 97 monitoring; goal setting; providing feedback on performance; and, review of behaviour goals,  
10  
11 98 is associated with increased intervention effectiveness in PA interventions[21]. Interventions  
12  
13 99 that meet the support needs and offer opportunities for self-monitoring have been found to be  
14  
15 100 effective for improving PA in other chronic disease groups[22]. Wearable technology holds  
16  
17 101 great potential as an easy to use, low cost self-monitoring tool with feedback[23] and are  
18  
19 102 perceived as acceptable and useful for individuals with chronic diseases[24]. Furthermore,  
20  
21 103 telecommunication allows for real-time verbal and visual interaction between patients and  
22  
23 104 clinicians.  
24  
25  
26  
27  
28  
29  
30

31 105 The primary aim of this study is to assess the feasibility, acceptability, utility and safety  
32  
33 106 of a novel home-based exercise training programme for PH patients. BCT's will be integrated  
34  
35 107 in the intervention through wearable technology devices, the use of print and electronic  
36  
37 108 materials and health coaching and support calls. The secondary aim is to examine the impact  
38  
39 109 of the intervention on exercise capacity, physical activity levels, strength, health-related QoL  
40  
41 110 and exercise self-efficacy.  
42  
43  
44  
45  
46  
47

## 111 METHODS AND ANALYSIS

### 112 Study Design

113 The study will employ a single group pre-post-intervention design with a follow up  
114 maintenance phase. The purpose of the maintenance phase is to assess if the intervention  
115 facilitates the adoption of independent exercise in participants when support is removed. The  
116 study will adhere to the Standard Protocol Items: Recommendations for Interventional Trials



## PHAHB Intervention Protocol

1  
2  
3 117 Reporting Template (SPIRIT)[25]. Participants will complete assessments at baseline (T1),  
4  
5 118 after the 10- week intervention (T2) and at 20-weeks follow up (T3).  
6  
7  
8  
9

119

120 **Eligibility Criteria**

121 Inclusion criteria are male or female > 18 years, with a diagnosis of PH by right  
122 heart catheterisation showing baseline mean pulmonary arterial pressure  $\geq 25$  mm Hg,  
123 pulmonary vascular resistance  $\geq 240$  dyn s cm<sup>-5</sup>, pulmonary capillary wedge pressure  $\leq 15$   
124 mmHg and receiving optimized conventional PH therapy. Participants must be clinically stable  
125 with no medication changes in the 2 months prior to enrolment.

126 Exclusion criteria include PH of any cause other than outlined in the inclusion criteria such as  
127 PH from left heart disease or lung disease/hypoxia, pregnancy, signs of right heart  
128 decompensation, acute infection and pyrexia, change in disease-targeted therapy within the last  
129 2 months, scheduled to receive an investigational drug during the course of the study,  
130 FEV1/FVC <0.5, total lung capacity <70% of the normal value, active liver disease, porphyria,  
131 elevations of serum transaminases >3 x upper limit of normal (ULN), bilirubin >1.5 x ULN,  
132 haemoglobin concentration <75% of the lower limit of normal, systolic blood pressure <85  
133 mmHg, active myocarditis, unstable angina pectoris, exercise induced ventricular arrhythmias,  
134 decompensated heart failure, hypertrophic obstructive cardiomyopathy or impaired left  
135 ventricular function.

136

137 **Participant Recruitment**

138 Participants will be recruited from the Pulmonary Hypertension Unit at the Mater  
139 Misericordiae University Hospital, Dublin, Ireland. Eligible participants will be invited to  
140 participate during their routine 3-6-month clinic visit. They will be given a verbal explanation

## PHAHB Intervention Protocol

1  
2  
3 141 of the study and provided with a participation information sheet by their PH Specialist  
4  
5 142 (SG/BMC) or a member of their team. After receiving the information, potential participants  
6  
7 143 will have the option to speak on the day to a member of the research team or to receive a follow-  
8  
9 144 up phone call within 1-2 days. Participants will have the opportunity to ask questions and will  
10  
11 145 have time to consider their participation. Written consent will be obtained by mail.  
12  
13  
14

15 146

### 147 **Sample Size**

148 A key objective of this feasibility study is to collate primary outcome measures to  
149 help inform sample size calculations for future outcome trials. Pilot study sample size typically  
150 ranges from 24 to 50[26-28]. We estimate a target sample size of 25 to be sufficient for this  
151 feasibility study[27].  
152

### 153 **Procedure**

154 Participants will complete all assessments, induction training and exercise training  
155 in their own home and will maintain contact with researchers via telecommunication  
156 technologies (phone, videoconferencing and email). Following consent, a baseline assessment  
157 will be conducted (see Table 1) and participants will be provided with an accelerometer to  
158 record their activity for the following week, along with a prepaid postage envelope to return  
159 device. The assessment procedure will be repeated at T2 (10-weeks) and T3 (20-weeks).

160 Participants will be provided with a home exercise bike (NordicTrack GX 2.7U), a wearable  
161 tracker watch (The Fibit Charge 3), pulse oximeter (SafeHeart SpO<sub>2</sub> monitor), real time single  
162 lead ECG/HR/respiratory rate monitor (Frontier X), blood pressure monitor (Beurer BM44),  
163 exercise manual, exercise diary and access to online videos. The exercise manual offers a  
164 comprehensive, patient-friendly resource detailing; 1) general information about the trial; 2)

## PHAHB Intervention Protocol

1  
2  
3 165 useful links and contacts; 3) background information on PH; 4) education regarding exercise  
4  
5 166 safety and the benefits of physical activity; 5) workbook style sections on motivation, goal  
6  
7 167 setting, overcoming barriers and psychosocial support; 6) managing breathlessness; 7) exercise  
8  
9 168 intensity and limits; 8) guided home exercises with written and visual details and advice on  
10  
11 169 progression; and 9) advice on pacing and energy conservation. Online videos will provide a  
12  
13 170 visual demonstration of each exercise. Participants will be provided with an exercise diary as  
14  
15 171 a tool to record their activity and effort.

16  
17  
18  
19 172 The 10-week intervention consists of the following components: Three 60-90 min induction  
20  
21 173 sessions (over week 1 and 2), up to five 30-min support health coaching sessions (at week 2,  
22  
23 174 3, 5, 7, 9) and 3-5 weekly home-based exercise sessions. The intervention will end prior to T2  
24  
25 175 assessment. Participants will continue to have access to the exercise manual, bike and Fitbit  
26  
27 176 between T2 and T3, the maintenance phase.

28  
29  
30  
31  
32 177

33  
34 178 ***Induction Training***

35  
36  
37 179 Induction training is a key component to ensure patients are confident to exercise at  
38  
39 180 home and understand the appropriate exercise intensity and how to exercise safely.1:1  
40  
41 181 induction sessions will take place via video conferencing. Participants will be encouraged to  
42  
43 182 involve a family member, friend or carer in the induction training. The sessions will focus on  
44  
45 183 the following topics:

46  
47  
48  
49 184 *Session 1 - Introduction*; Education on PH and benefits of PA for PH. Familiarisation with  
50  
51 185 intervention materials/equipment and self-monitoring.

52  
53  
54 186 *Session 2 - Exercise Safety and Exercise Demonstration*; The session will focus on recognizing  
55  
56 187 exercise limits, warning signs, and managing exercise intensity. Visual demonstrations of  
57  
58 188 breathing techniques and aerobic, strength and respiratory training will be provided, with the  
59  
60

## PHAHB Intervention Protocol

189 opportunity for behavioural practice during the session to check technique and instil  
190 confidence.

191 *Session 3 - Recap*; Exercise demonstrations and key safety points will be reviewed. Any issues  
192 regarding intervention materials/equipment will be addressed and participant goals will be  
193 reviewed, alongside additional tips for family/friend support and motivation.

194

### 195 ***Health Coaching Sessions***

196 During the intervention, participants will receive up to five 30 min formal health  
197 coaching sessions via videoconferencing. These sessions will use BCTs to improve exercise  
198 adherence, motivate and provide support. Over the 5 sessions the topics will include; benefits  
199 of exercise, goal setting, action planning, self-monitoring, identification and management of  
200 barriers to exercise, problem solving and feedback on behaviour, with the option for  
201 participants to complete formal paperwork in the intervention manual. If required, additional  
202 support will be available outside of scheduled sessions.

203 Participants will be asked to wear the Fitbit Charge 3 daily during the 10-weeks. The Fitbit  
204 data will be used to guide individually tailored goals, assess adherence to exercise and overall  
205 daily PA and as tool to provide feedback to the researcher and participants.

206

### 207 ***Exercise Program***

208 Participants will complete a 10-week individualised, home-based exercise  
209 programme. The programme will be prescribed using the FITT principle (Frequency, Intensity,  
210 Time and Type) and will employ a multimodal approach that integrates aerobic, resistance and  
211 respiratory training. The goals for each component are outlined in the sections below. These  
212 are aspirational goals that may not be realistic for all participants. Exercise prescription will

## PHAHB Intervention Protocol

1  
2  
3 213 be individualized based on their baseline PA levels, 6 min walk test distance (6MWD) and  
4  
5 214 physical capabilities. The modified Borg rating of perceived exertion (RPE) scale[29] will be  
6  
7  
8 215 used to help prescribe exercise intensity. The RPE scale is a psychophysiological measurement  
9  
10 216 that translates physical stimuli to a psychological construct of perceived exertion and has been  
11  
12 217 validated in other clinical groups[30]. Participants will aim to achieve an RPE of 3 (moderate)  
13  
14 218 initially. Based on individual progress an RPE of 4 (somewhat hard) may be advised for some  
15  
16  
17 219 participants.

18  
19  
20 220 All participants exercise program will include:

21  
22 221 *Aerobic Training*; Participants will initially aim will be to undertake a minimum of 10 min of  
23  
24 222 structured aerobic exercise involving walking, cycling or a combination on  $\geq 3$  d/week.  
25  
26 223 Participants will be allowed to perform this exercise in a single bout, or accumulate it in bouts  
27  
28 224 of at least 5 min in duration. The duration will be progressively increased, with the goal of  
29  
30 225 accumulating  $\geq 30$  min on  $\geq 5$  d/week.  
31  
32  
33

34  
35 226 *Resistance Training*; Participants will initially undertake resistance training on 2 d/week,  
36  
37 227 involving a single set of 6-8 repetitions of upper and lower extremity and whole body exercises.  
38  
39 228 Training volume will progressively increase with the goal of completing 2-3 sets of 10-12 reps  
40  
41 229 of 4-6 exercises on three non-consecutive days. Participants will use pursed lip breathing to  
42  
43 230 help airways stay open during exhalation. Bodyweight resistance will be used initially and  
44  
45 231 based on individual ability, tera bands, water bottles or light dumbbells will be introduced.  
46  
47  
48

49 232 *Respiratory Training*; Participants will initially perform 10 min of respiratory training at least  
50  
51 233 twice a week, involving a combination of stretching, breathing techniques (e.g., pursed lip,  
52  
53 234 diaphragmic and slow breathing), yoga, and respiratory muscle strengthening exercises.  
54  
55 235 Training volume will progressively increase with the goal of completing 15/20 min of  
56  
57 236 accumulated respiratory training on  $\geq 3$  d/week.  
58  
59  
60

## PHAHB Intervention Protocol

237 Participants will wear a Frontier X device (receiver attached to a strap place around the chest)  
 238 during all exercise sessions. The first 2 weeks will be monitored by researchers and then  
 239 periodically monitored. This will allow access to real time ECG, heart rate (HR), respiratory  
 240 rate and cadence. Oxygen saturation will be monitored and participants will be instructed to  
 241 stop exercising if the SpO<sub>2</sub> value drops below 88%, as per guidelines[31]. Participants will  
 242 document any adverse events and report to the research team immediately.

243

244 **Study Outcome Measures**

245 Outcome assessments will take place at baseline (T1), after the 10-week intervention  
 246 (T2) and at 20-weeks follow up (T3). Semi-structured interviews will be conducted at T2 to  
 247 assess patient's perspective on program acceptability and feasibility and at T3 to assess the  
 248 follow up phase. Table 1 outline the timepoints of the outcomes.

249 Table 1: Study outcome measures and time points

| Assessments                                   | Timepoint     |                        |                |
|-----------------------------------------------|---------------|------------------------|----------------|
|                                               | Baseline (T1) | Post-Intervention (T2) | Follow-up (T3) |
| Written informed consent & eligibility        | X             |                        |                |
| Demographics                                  | X             |                        |                |
| Medical history                               | X             |                        |                |
| WHO functional class                          | X             | X                      | X              |
| Concomitant medication                        | X             | X                      | X              |
| Adverse events                                | X             | X                      | X              |
| Exercise capacity (6-MWT), Borg Dyspnea Index | X             | X                      | X              |

## PHAHB Intervention Protocol

|                                                                 |   |   |   |
|-----------------------------------------------------------------|---|---|---|
| Muscle strength (Sit to Stand)                                  | X | X | X |
| Physical activity (ActivPAL Micro)                              | X | X | X |
| Quality of life (CAMPHOR & SF-36)                               | X | X | X |
| Fear of exercise (Tampa Scale)                                  | X | X | X |
| Psychological constructs                                        | X | X | X |
| Intervention debrief questionnaires/ semi-structured interviews |   | X | X |

250

251 **Primary Outcomes**

252 Primary outcome is the feasibility, acceptability, utility and safety of the intervention.

253 Feasibility of the intervention will be assessed by (i) participant recruitment (enrolment as a  
 254 proportion of eligible patients) and retention (proportion that completed all assessments); (ii)  
 255 engagement with the intervention measured according to attendance at induction sessions and  
 256 health coaching sessions and adherence, defined as the percentage of home-based exercise  
 257 sessions recorded by participants who complete the intervention assessed via log books and  
 258 weekly calls) and (iii) Implementation process and fidelity of the intervention captured through  
 259 observation and detailed field notes. Researchers will note the feasibility of the trial protocols  
 260 including the outcome assessment and any additional information on patient interactions or  
 261 response during the intervention.

262 Acceptability and utility of the intervention will be assessed through self-report  
 263 questionnaires and semi-structured interview. At T2 participants will be asked to complete a  
 264 self-report questionnaire, assessing perceptions of intervention appropriateness, effectiveness,  
 265 quality, accessibility/usability, intrusiveness, and overall enjoyment and attitude towards the  
 266 intervention.

## PHAHB Intervention Protocol

267           Semi-structured interviews will probe the elements outlined in the self-report  
268 questionnaire and will include perceptions of intervention practicality, i.e., participants' ability  
269 to undertake the prescribed activities and to accommodate the intervention within normal daily-  
270 life activities. Participants will be asked to highlight barriers to participation and offer  
271 suggestions for improvement and implementation. Interviews will be conducted via telephone  
272 and will be audio-recorded and transcribed. Interviews at T3 will assess the 10 weeks  
273 maintenance period.

274           Safety (patient reported adverse events directly related to participation in the exercise  
275 intervention) will be assessed during support calls and participants will be instructed to inform  
276 researchers immediately of any adverse events in the time between calls.

**278 Secondary Outcomes**

279 **Exercise capacity:** Assessed using the 6 min walk test (6MWT). The test will be administered  
280 according to the European Respiratory Society Guidelines[32] and will be conducted at each  
281 participants home using detailed step by step video and written instructions and remotely  
282 supervised via phone/teleconferencing by a researcher (CMC). A family member/friend will  
283 assist with conducting the test, including measuring blood pressure and SpO<sub>2</sub> with guidance  
284 from the researcher before and after the test. Subjective symptoms (RPE and dyspnoea- Borg  
285 Dyspnoea Scale 0-10) will be recorded before and after the test. The Frontier X chest worn  
286 monitor will be worn during the test to provide real time feedback. The assistant will ask the  
287 participant to call out their SpO<sub>2</sub> and HR at each min of the test. Standard encouragement will  
288 be delivered by the assistant, with researcher prompting, if needed. The study participants are  
289 very familiar with the 6MWT.

290



## PHAHB Intervention Protocol

1  
2  
3 291 **Muscular strength:** Lower body muscle strength will be assessed using the 30 sec sit-to-stand  
4  
5 292 test (STS) from a seat height of 40-45 cm. The STS is a commonly used field-based measure  
6  
7 293 of functional lower limb muscle strength, particularly in clinical and elderly populations. The  
8  
9 294 test will be conducted in each participant's home via teleconference. A researcher (CMC) will  
10  
11 295 provide a demonstration, time the test, and count the repetitions. Each participant will perform  
12  
13 296 two trials separated by 5 min, with the best score being recorded.  
14  
15  
16

17 297  
18  
19  
20 298 **Physical activity behaviour:** ActivPAL<sup>3</sup> micro activity monitors (PAL Technologies Ltd.  
21  
22 299 Glasgow, Scotland) will be used to assess free living activity behaviour. The device samples  
23  
24 300 at 20Hz for 15 sec epochs and measures bodily accelerations using triaxial accelerometer. An  
25  
26 301 inbuilt inclinometer measures thigh inclination. Proprietary algorithms classifies activities into  
27  
28 302 sitting/lying time, standing time, stepping time, step count and activity counts. Participants  
29  
30 303 will be mailed the accelerometer together with detailed wear instruction and provided with a  
31  
32 304 prepaid postage envelope to return the device. They will be instructed to wear the device on  
33  
34 305 the anterior aspect of their right thigh continuously for 7 days, except during water immersion  
35  
36 306 activities (i.e., swimming and bathing). The ActivPAL is a valid and reliable measure of  
37  
38 307 activity and sedentary behaviour[33-34].  
39  
40  
41  
42  
43  
44 308

309 **Psychological Outcomes and Mediators**

48  
49 310 **Quality of life:** The Medical Outcomes Study Short-Form 36-Item Survey (SF-36) is a well-  
50  
51 311 validated, generic questionnaire[35] consisting of physical functioning, physical role  
52  
53 312 functioning, bodily pain, and general health and the four mental subscales of vitality, social  
54  
55 313 functioning, emotional role functioning and mental health. The Cambridge Pulmonary  
56  
57 314 Hypertension Outcome Review (CAMPHOR)[36] was designed as a disease-specific health-  
58  
59  
60

## PHAHB Intervention Protocol

1  
2  
3 315 related QoL measure for PH patients. It is widely used as a clinical and research tool in PH. It  
4  
5 316 is made up of 3 main dimensions which assess symptoms (25 items) functioning (15 items)  
6  
7 317 and quality life (25 items).

8  
9  
10 318 **Fatigue:** The Fatigue Severity Scale (FSS)[37] measures the patient's perception of the  
11  
12 319 influence of fatigue on physical and social functioning through responses to nine different  
13  
14 320 physical and social functioning situations. The FSS is a valid tool for assessing fatigue across  
15  
16 321 various health conditions[38].

17  
18  
19  
20 322 **Self-regulatory self-efficacy for exercise:** Assessed using a modified 11-item scale[39-40],  
21  
22 323 which provide information on task, scheduling and recovery self-efficacy. Questions begin  
23  
24 324 with the stem "*How confident are you that you can...*" and include items such as "*plan exercise*  
25  
26 325 *sessions that will be at least moderately difficult (e.g. have you breathing a little hard, your*  
27  
28 326 *heart rate increases)?*". Participants rate their confidence on a Likert scale from 0 (not  
29  
30 327 confident at all) to 10 (very confident), with a higher score indicating greater self-efficacy for  
31  
32 328 exercise (Cronbach alpha,  $\alpha = .951$ ).

33  
34  
35  
36 329 **Intentions to exercise:** Two items will measure intention to engage in moderate intensity  
37  
38 330 physical activity for 150 min per week in the next 10 weeks, based on previously established  
39  
40 331 measures[41].

41  
42  
43  
44 332 **Outcome expectations:** Ten-items will assess outcome expectations. Five-items are derived  
45  
46 333 from the validated exercise pros subscale[42] and 5-items to assess outcomes on symptoms  
47  
48 334 associated with PH.

49  
50  
51 335 **Social support:** Social support for exercise from family and friends scale[43] uses a 10-item  
52  
53 336 scale assessing support from family and 10 items reflecting support from friends. Responses  
54  
55 337 will be recorded on a Likert scale of 1-5, with higher scores representing greater social support.  
56  
57 338 (Cronbach alpha, family  $\alpha = .926$ , friends  $\alpha = .921$ ).

## PHAHB Intervention Protocol

339

**340 Data Management**

341 The trial will be overseen by the trial management group, consisting the principal  
342 investigator, the trial-coordinator and health coach. They will meet every 4 weeks and will  
343 oversee all aspects of the conduct of the trial including performing safety oversight activities.  
344 Individual data will be de-identified, coded and entered. Each participant, after providing  
345 consent, will be assigned a personal identification code (PIC), which will be used on all case  
346 report forms and in all electronic databases. Quantitative data will be double data entered, and  
347 data validation will take place according to the procedures set out in the data management plan  
348 and data validation plan. Prior to any statistical analysis, all variables will be checked for  
349 missing, impossible and improbable values. Impossible and improbable values will be defined  
350 by clinical opinion and will include values that are outside three standard deviations of the  
351 mean value.

**353 Statistical Analysis**

354 Statistical analysis of quantitative data will be performed using SPSS Version 24. Prior  
355 to statistical analysis, the Shapiro-Wilks test will be applied to check for normality. Continuous  
356 variables will be reported as mean (range), mean (standard deviation) or median and inter-  
357 quartile range, depending on distribution, and categorical variables as frequency (%).  
358 Descriptive analyses will be undertaken to summarise participant characteristics and the  
359 quantitative data of the intervention feasibility, acceptability and utility. Qualitative data from  
360 post trial interviews and researcher field notes will be analyzed using inductive thematic  
361 analysis to identity common themes[44]. A one-way ANOVA with repeated measures will be

## PHAHB Intervention Protocol

362 used to compare the mean differences in secondary outcome variables between baseline(T1),  
363 10 weeks(T2) and 20 weeks (T3).

364

### 365 **Patient and Public Involvement**

366 Formative qualitative research took place with PH patients during intervention  
367 development stages. Semi structured 1:1 phone interviews (N=20) were conducted providing  
368 insight into patient barriers and motivators to PA, current PA levels, past experience and  
369 personal preferences on components of an exercise programme. The findings fed into the  
370 design of the intervention along with PH clinician input. A patient representative provided  
371 opinions on the study protocol, patient-facing documentation (e.g. Participants Information  
372 Sheet) and intervention material (e.g. exercise manual) to ensure it was patient friendly.

### 373 **Discussion**

374 The promise of exercise training in the treatment and management of PH has gained  
375 significant interest over the past two decades. The observed positive effects of exercise  
376 programs on patients' exercise capacity, functional capacity and QoL[44] make a strong  
377 argument for the inclusion of exercise as an adjunctive therapy for stable PH patients[46].  
378 Considering that structured and resource-intensive hospital-based exercise programs are  
379 unlikely to be scalable, it is an opportune time to assess the efficacy, safety and impact of  
380 home-based programs as an alternative mode of delivery for PH patients.

381 A home-based exercise program may eliminate many of the barriers associated with  
382 in-patients or out-patients setting such as transportation issues, location, long wait periods for  
383 availability and further accessibility for patients. A recent review of exercise interventions in  
384 PH by Ozemek and colleagues[46] highlighted the need for inclusion of home exercise  
385 programs to allow patients achieve the optimal 5 to 6 days of structured exercise.

## PHAHB Intervention Protocol

1  
2  
3 386 This study will utilise a remote delivery for exercise training with the use of telehealth methods,  
4  
5 387 wearable technology, performance feedback and behavioural support to deliver and monitor  
6  
7 388 the intervention. The aim is to eliminate the burden on patients to attend several times per  
8  
9  
10 389 week to an outpatient clinic, accommodate resource availability, make the program achievable  
11  
12 390 in a 'real world' setting and improve the reach beyond the traditional healthcare facilities. The  
13  
14 391 follow-up post intervention (T3) phase will provide insight into whether behavioural support  
15  
16 392 is necessary in order for PH patients to remain physically active. PH is considered a rare disease  
17  
18 393 and with support centralised, remote services, which include assessment of patient progress are  
19  
20 394 required. Remote assessment of outcomes may remove threats to external validity and  
21  
22 395 evaluation of the feasibility of such assessment will address the goals of implementation  
23  
24 396 science to close the research-to-practice gap and support implementation and scale up of  
25  
26 397 evidence-based interventions[47].  
27  
28  
29

30 398 To our knowledge, this will be the first study to employ the use of evidence-based  
31  
32 399 BCTs to examine the feasibility, utility and efficacy of a remote home-based approach to  
33  
34 400 exercise training for medically stable PH patients. The secondary aims of this study are to  
35  
36 401 evaluate whether this approach leads to improvement in selected indices of physical and  
37  
38 402 psychological health.  
39  
40  
41  
42

**403 Conclusion**

44  
45 404 PH is a rare, debilitating condition with most clinics centralized and limited community  
46  
47 405 resources available. Telehealth holds significant potential to meet the growing support for  
48  
49 406 exercise training to be included as an add-on therapy by offering remote training and support,  
50  
51 407 which is key to long-term implementation of exercise training for the PH population. It  
52  
53 408 provides a service that is more accessible and may potentially offer a more affordable enhanced  
54  
55 409 level of care. Our current understanding is limited with regards the acceptability, feasibility  
56  
57  
58  
59  
60

## PHAHB Intervention Protocol

1  
2  
3 410 and utility of a home-program for stable PH patients. This study will help gain a valuable  
4  
5 411 insight into this gap in knowledge.  
6  
7  
8 412

413 **References**

- 14 414 1. Gaine S, McLaughlin V. Pulmonary arterial hypertension: tailoring treatment to risk in  
15 415 the current era. *Eur Respir Rev.* 2017;26(146):170095. doi:10.1183/16000617.0095-  
16 416 2017.  
17 417  
18 418 2. Taylor RS, Sagar VA, Davies EJ, et al. Exercise-based rehabilitation for heart  
19 419 failure. *Cochrane Database Syst Rev.* 2014;2014(4):CD003331.  
20 420 doi:10.1002/14651858.CD003331.pub4.  
21 421  
22 422 3. Buys R, Avila A, Cornelissen VA. Exercise training improves physical fitness in  
23 423 patients with pulmonary arterial hypertension: a systematic review and meta-analysis  
24 424 of controlled trials. *BMC Pulm Med.* 2015;15:40. doi:10.1186/s12890-015-0031-1.  
25 425  
26 426  
27 427 4. Langer D, Hendriks E, Burtin C, et al. A clinical practice guideline for physiotherapists  
28 428 treating patients with chronic obstructive pulmonary disease based on a systematic  
29 429 review of available evidence. *Clin Rehabil.* 2009;23(5):445-462.  
30 430 doi:10.1177/0269215509103507.  
31 431  
32 432 5. Vanhees L, Rauch B, Piepoli M, et al. Importance of characteristics and modalities of  
33 433 physical activity and exercise in the management of cardiovascular health in individuals  
34 434 with cardiovascular disease (Part III). *Eur J Prev Cardiol.* 2012;19(6):1333-1356.  
35 435 doi:10.1177/2047487312437063.  
36 436  
37 437 6. Morris NR, Kermeen FD, Holland AE. Exercise-based rehabilitation programmes for  
38 438 pulmonary hypertension. *Cochrane Database Syst Rev.* 2017;1(1):CD011285..  
39 439 doi:10.1002/14651858.CD011285.pub2.  
40 440  
41 441 7. Dalla Vecchia LA, Bussotti M. Exercise training in pulmonary arterial hypertension. *J*  
42 442 *Thorac Dis.* 2018;10(1):508-521. doi:10.21037/jtd.2018.01.90.  
43 443  
44 444 8. Babu AS, Padmakumar R, Maiya AG, Mohapatra AK, et al . Effects of Exercise  
45 445 Training on Exercise Capacity in Pulmonary Arterial Hypertension: A Systematic  
46 446 Review of Clinical Trials. *Heart Lung Circ.* 2016;25(4):333-341.  
47 447 doi:10.1016/j.hlc.2015.10.01.  
48 448  
49 449 9. Yuan P, Yuan XT, Sun XY, et al. Exercise training for pulmonary hypertension: a  
50 450 systematic review and meta-analysis. *Int J Cardiol.* 2015;178:142-146.  
51 451 doi:10.1016/j.ijcard.2014.10.161.  
52 452  
53  
54  
55  
56  
57  
58  
59  
60

## PHAHB Intervention Protocol

- 1  
2  
3 453 10. Pandey A, Garg S, Khunger M, et al. Efficacy and Safety of Exercise Training in  
4 454 Chronic Pulmonary Hypertension: Systematic Review and Meta-Analysis. *Circ Heart*  
5 455 *Fail.* 2015;8(6):1032-1043. doi:10.1161/CIRCHEARTFAILURE.115.00.  
6 456  
7 457 11. Benjamin N, Marra AM, Eichstaedt C, Grünig E. Exercise Training and Rehabilitation  
8 458 in Pulmonary Hypertension. *Heart Fail Clin.* 2018;14(3):425-430.  
9 459 doi:10.1016/j.hfc.2018.03.008.  
10 460  
11 461 12. Galiè N, Humbert M, Vachiery JL, et al. 2015 ESC/ERS Guidelines for the diagnosis  
12 462 and treatment of pulmonary hypertension: The Joint Task Force for the Diagnosis and  
13 463 Treatment of Pulmonary Hypertension of the European Society of Cardiology (ESC)  
14 464 and the European Respiratory Society (ERS). *Eur Respir J.* 2015;46(4):903-975.  
15 465 doi:10.1183/13993003.01032-2015.  
16 466  
17 467 13. Galiè N, Corris PA, Frost A, et al. Updated treatment algorithm of pulmonary arterial  
18 468 hypertension. *J Am Coll Cardiol.* 2013;62(25 Suppl):D60-D72.  
19 469 doi:10.1016/j.jacc.2013.10.031.  
20 470  
21 471 14. Mereles D, Ehlken N, Kreuscher S, et al. Exercise and respiratory training improve  
22 472 exercise capacity and quality of life in patients with severe chronic pulmonary  
23 473 hypertension. *Circulation.* 2006;114(14):1482-1489.  
24 474 doi:10.1161/CIRCULATIONAHA.106.618397.  
25 475  
26 476 15. Buckingham SA, Taylor RS, Jolly K, et al. Home-based versus centre-based cardiac  
27 477 rehabilitation: abridged Cochrane systematic review and meta-analysis. *Open Heart.*  
28 478 2016;3(2):e000463. doi:10.1136/openhrt-2016-000463.  
29 479  
30 480 16. Hardcastle SJ, & Cohen PA. Effective physical activity promotion to survivors of  
31 481 cancer is likely to be home based and to require oncologist participation. *J Clin Oncol*  
32 482 2017;35:3635-3637. doi: 10.1200/JCO.2017.74.6032.  
33 483  
34 484 17. Maxwell-Smith C, Zeps N, Hagger MS, et al. Barriers to physical activity participation  
35 485 in colorectal cancer survivors at high risk of cardiovascular disease. *Psycho-oncology*  
36 486 2017;26:808-814. doi:10.1002/pon.4234.  
37 487  
38 488 18. Artinian NT, Fletcher GF, Mozaffarian D, et al. Interventions to promote physical  
39 489 activity and dietary lifestyle changes for cardiovascular risk factor reduction in adults:  
40 490 a scientific statement from the American Heart Association. *Circulation.*  
41 491 2010;122(4):406-441. doi:10.1161/CIR.0b013e3181e8edf1.  
42 492  
43 493 19. Michie S, van Stralen MM, West R. The behaviour change wheel: a new method for  
44 494 characterising and designing behaviour change interventions. *Implement Sci.*  
45 495 2011;6:42. Published 2011 Apr 23. doi:10.1186/1748-5908-6-42.  
46 496  
47 497 20. Samdal GB, Eide GE, Barth T, Williams G, Meland E. Effective behaviour change  
48 498 techniques for physical activity and healthy eating in overweight and obese adults;  
49 499 systematic review and meta-regression analyses. *Int J Behav Nutr Phys Act.*  
50 500 2017;14(1):42. Published 2017 Mar 28. doi:10.1186/s12966-017-0494-y.  
51 501  
52  
53  
54  
55  
56  
57  
58  
59  
60

## PHAHB Intervention Protocol

- 1  
2  
3 502 21. Artinian NT, Fletcher GF, Mozaffarian D, et al. Interventions to promote physical  
4 503 activity and dietary lifestyle changes for cardiovascular risk factor reduction in adults:  
5 504 a scientific statement from the American Heart Association. *Circulation*.  
6 505 2010;122(4):406-441. doi:10.1161/CIR.0b013e3181e8edf1.  
7 506  
8 507 22. Lahart I, Metsios G, Nevill AM, et al. Randomised controlled trial of a home-based  
9 508 physical activity intervention in breast cancer survivors. *BMC Cancer* 2016; 16:234-  
10 509 247. doi: 10.1186/s12885-016-2258-5.  
11 510  
12 511 23. Hardcastle SJ, Hince D, Jiménez-Castuera R, et al. Promoting physical activity in  
13 512 regional and remote cancer survivors (PPARCS) using wearables and health coaching:  
14 513 randomised controlled trial protocol  
15 514 *BMJOpen* 2019;9:e028369. doi: 10.1136/bmjopen-2018-028369.  
16 515  
17 516 24. Mercer K, Giangregorio L, Schneider E, et al. Acceptance of commercially available  
18 517 wearable activity trackers among adults aged over 50 and with chronic illness: a mixed-  
19 518 methods evaluation. *JMIR Mhealth Uhealth* 2016;4: e7. doi:10.2196/mhealth.4225.  
20 519  
21 520 25. Chan A, Tetzlaff JM, Altman DG, et al. SPIRIT 2013 statement: Defining standard  
22 521 protocol items for clinical trials. *Annals of Internal Medicine* 2013;158:200-207.  
23 522  
24 523 26. Browne RH. On the use of a pilot sample for sample size determination. *Stat Med*.  
25 524 1995;14(17):1933-1940. doi:10.1002/sim.4780141709.  
26 525  
27 526 27. Julious SA: Sample size of 12 per group rule of thumb for a pilot study. *Pharm Stat*.  
28 527 2005, 4 (4): 287-291. 10.1002/pst.185.  
29 528  
30 529 28. Sim J, Lewis M. The size of a pilot study for a clinical trial should be calculated in  
31 530 relation to considerations of precision and efficiency. *J Clin Epidemiol*.  
32 531 2012;65(3):301-308. doi:10.1016/j.jclinepi.2011.07.011.  
33 532  
34 533 29. Foster C, Florhaug JA, Franklin J, et al. A new approach to monitoring exercise  
35 534 training. *J Strength Cond Res*. 2001;15(1):109-115.  
36 535  
37 536 30. Rosales W, Cofré C, Alejandra C, et al. Validación de la escala de Borg en personas  
38 537 con diabetes mellitus tipo 2 [Validation of the Borg scale in participants with type 2  
39 538 diabetes mellitus]. *Rev Med Chil*. 2016;144(9):1159-1163. doi:10.4067/S0034-  
40 539 98872016000900009.  
41 540  
42 541 31. Spruit MA, Singh SJ, Garvey C, et al. An official American Thoracic Society/European  
43 542 Respiratory Society statement: key concepts and advances in pulmonary  
44 543 rehabilitation. *Am J Respir Crit Care Med*. 2013;188(8):e13-e64.  
45 544 doi:10.1164/rccm.201309-1634ST.  
46 545  
47 546 32. Holland AE, Spruit MA, Troosters T, et al. An official European Respiratory  
48 547 Society/American Thoracic Society technical standard: field walking tests in chronic  
49 548 respiratory disease. *Eur Respir J*. 2014;44(6):1428-1446.  
50 549 doi:10.1183/09031936.00150314.  
51  
52  
53  
54  
55  
56  
57  
58  
59  
60



## PHAHB Intervention Protocol

- 1  
2  
3 550 33. Harrington DM, Welk GJ, Donnelly AE. Validation of MET estimates and step  
4 551 measurement using the ActivPAL physical activity logger. *J Sports Sci.*  
5 552 2011;29(6):627-633. doi:10.1080/02640414.2010.549499.  
6 553  
7  
8 554 34. Kozey-Keadle S, Libertine A, Lyden K, et al. Validation of wearable monitors for  
9 555 assessing sedentary behavior. *Med Sci Sports Exerc.* 2011;43(8):1561-1567.  
10 556 doi:10.1249/MSS.0b013e31820ce174.  
11 557  
12 558 35. Ware JE, Sherbourne CD. The MOS 36-Item Short-Form Health Survey (SF-36). I.  
13 559 Conceptual framework and item selection. *Med Care* 1992;30:473-83.  
14 560  
15 561 36. McKenna SP, Doughty N, Meads DM, Doward LC, Pepke-Zaba J. The Cambridge  
16 562 Pulmonary Hypertension Outcome Review (CAMPHOR): a measure of health-related  
17 563 quality of life and quality of life for patients with pulmonary hypertension. *Qual Life*  
18 564 *Res.* 2006;15(1):103-115. doi:10.1007/s11136-005-3513-4.  
19 565  
20 566 37. Krupp LB, LaRocca NG, Muir-Nash J, Steinberg AD. The Fatigue Severity  
21 567 Scale: Application to Patients With Multiple Sclerosis and Systemic Lupus  
22 568 Erythematosus. *Arch Neurol.* 1989;46(10):1121-1123.  
23 569 doi:10.1001/archneur.1989.00520460115022.  
24 570  
25 571 38. Schentag CT, Cichon J, MacKinnon A, Gladman DD, Urowitz MB. Validation and  
26 572 normative data for the 0-10 point scale version of the fatigue severity scale  
27 573 (FSS) [abstract]. *Arthritis Rheum* 2000; 43 Suppl: S177.  
28 574  
29 575 39. Luszczynska, A., & Sutton, S. (2006). Physical activity after cardiac rehabilitation:  
30 576 Evidence that different types of self-efficacy are important in maintainers and  
31 577 relapsers. *Rehabilitation Psychology*, 51(4), 314-321. doi. 10.1037/0090-  
32 578 5550.51.4.314.  
33 579  
34 580 40. Shields CA, Brawley LR. Preferring proxy-agency: impact on self-efficacy for  
35 581 exercise. *J Health Psychol.* 2006 Nov;11(6):904-14. doi: 10.1177/1359105306069092.  
36 582 PMID: 17035262.  
37 583  
38 584 41. Ajzen I, Brown TC, & Carvajal F. Explaining the discrepancy between intentions and  
39 585 actions: The case of hypothetical bias in contingent valuation. *Pers Soc Psychol Bull*  
40 586 2004;30:1108-1121. doi:10.1177/0146167204264079.  
41 587  
42 588 42. Plotnikoff RC, Blanchard CM, Hotz SB, et al. Validation of the decisional balance  
43 589 scales in the exercise domain from the transtheoretical model: A longitudinal test. *Meas*  
44 590 *Phys Educ Exerc Sci* 2001;5:191-206. doi:10.1207/S15327841MPEE0504\_01.  
45 591  
46 592 43. Sallis JF, Grossman RM, Pinski RB, Patterson TL, Nader PR. The development of  
47 593 scales to measure social support for diet and exercise behaviors. *Prev Med.*  
48 594 1987;16(6):825-836. doi:10.1016/0091-7435(87)90022-3.  
49 595  
50 596 44. Virginia Braun & Victoria Clarke. Using thematic analysis in psychology. *Qualitative*  
51 597 *Research in Psychology* 2006;3:2, 77-101. doi: 10.1191/1478088706qp063oa.  
52 598  
53  
54  
55  
56  
57  
58  
59  
60

## PHAHB Intervention Protocol

- 1  
2  
3 599 45. Dalla Vecchia LA, Bussotti M. Exercise training in pulmonary arterial hypertension. *J*  
4 600 *Thorac Dis.* 2018;10(1):508-521. doi:10.21037/jtd.2018.01.90.  
5 601  
6 602 46. Ozemek C, Berry MJ, Arena R. A Review of Exercise Interventions in Pulmonary  
7 603 Arterial Hypertension and Recommendations for Rehabilitation Programing. *J*  
8 604 *Cardiopulm Rehabil Prev.* 2019;39(3):138-145.  
9 605 doi:10.1097/HCR.0000000000000402.  
10 606  
11 607 47. Eccles MP, Armstrong D, Baker R, et al. An implementation research  
12 608 agenda. *Implement Sci.* 2009;4:18. Published 2009 Apr 7. doi:10.1186/1748-5908-4-  
13 609 18.  
14 610  
15 611

16 612 **Contributors:** CMC led the study conceptualisation, development of intervention content and  
17 613 writing of the protocol. BK, SH, NM contributed to the study design, implementation methods  
18 614 and refinement of the study protocol. All authors edited the manuscript.  
19  
20  
21  
22  
23  
24

25 615 **Funding:** This work was supported by Actelion Pharmaceutical Company. The funding body  
26 616 had no role in the study design and data collection, analysis and interpretation of data.  
27  
28  
29  
30  
31  
32  
33  
34  
35  
36  
37  
38  
39  
40  
41  
42  
43  
44  
45  
46  
47  
48  
49  
50  
51  
52  
53  
54  
55  
56  
57  
58  
59  
60

Table 1: Study outcome measures and time points

| Assessments                                                     | Timepoint     |                        |                |
|-----------------------------------------------------------------|---------------|------------------------|----------------|
|                                                                 | Baseline (T1) | Post-Intervention (T2) | Follow-up (T3) |
| Written informed consent & eligibility                          | X             |                        |                |
| Demographics                                                    | X             |                        |                |
| Medical history                                                 | X             |                        |                |
| WHO functional class                                            | X             | X                      | X              |
| Concomitant medication                                          | X             | X                      | X              |
| Adverse events                                                  | X             | X                      | X              |
| Exercise capacity (6-MWT), Borg Dyspnea Index                   | X             | X                      | X              |
| Muscle strength (Sit to Stand)                                  | X             | X                      | X              |
| Physical activity (ActivPAL Micro)                              | X             | X                      | X              |
| Quality of life (CAMPHOR & SF-36)                               | X             | X                      | X              |
| Fear of exercise (Tampa Scale)                                  | X             | X                      | X              |
| Psychological constructs                                        | X             | X                      | X              |
| Intervention debrief questionnaires/ semi-structured interviews |               | X                      | X              |

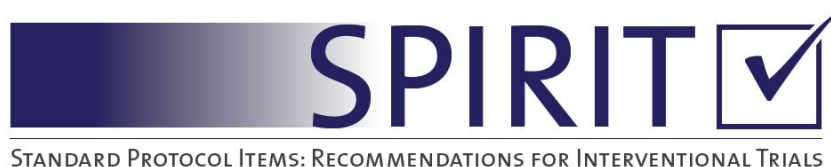

STANDARD PROTOCOL ITEMS: RECOMMENDATIONS FOR INTERVENTIONAL TRIALS

SPIRIT 2013 Checklist: Recommended items to address in a clinical trial protocol and related documents\*

| Section/item                      | Item No | Description                                                                                                                                                                                                                                                                                                 |
|-----------------------------------|---------|-------------------------------------------------------------------------------------------------------------------------------------------------------------------------------------------------------------------------------------------------------------------------------------------------------------|
| <b>Administrative information</b> |         |                                                                                                                                                                                                                                                                                                             |
| Title                             | 1       | Descriptive title identifying the study design, population, interventions, and, if applicable, trial acronym ( <b>Page 1</b> )                                                                                                                                                                              |
| Trial registration                | 2a      | Trial identifier and registry name. If not yet registered, name of intended registry ( <b>Page 2</b> )                                                                                                                                                                                                      |
|                                   | 2b      | All items from the World Health Organization Trial Registration Data Set ( <b>Page 2</b> )                                                                                                                                                                                                                  |
| Protocol version                  | 3       | Date and version identifier ( <b>Page 2</b> )                                                                                                                                                                                                                                                               |
| Funding                           | 4       | Sources and types of financial, material, and other support ( <b>Page 23</b> )                                                                                                                                                                                                                              |
| Roles and responsibilities        | 5a      | Names, affiliations, and roles of protocol contributors ( <b>Title page and Page 23</b> )                                                                                                                                                                                                                   |
|                                   | 5b      | Name and contact information for the trial sponsor ( <b>Page 23</b> )                                                                                                                                                                                                                                       |
|                                   | 5c      | Role of study sponsor and funders, if any, in study design; collection, management, analysis, and interpretation of data; writing of the report; and the decision to submit the report for publication, including whether they will have ultimate authority over any of these activities ( <b>Page 23</b> ) |
|                                   | 5d      | Composition, roles, and responsibilities of the coordinating centre, steering committee, endpoint adjudication committee, data management team, and other individuals or groups overseeing the trial, if applicable (see Item 21a for data monitoring committee) ( <b>Page 23</b> )                         |
| <b>Introduction</b>               |         |                                                                                                                                                                                                                                                                                                             |
| Background and rationale          | 6a      | Description of research question and justification for undertaking the trial, including summary of relevant studies (published and unpublished) examining benefits and harms for each intervention ( <b>Pages 3-5</b> )                                                                                     |
|                                   | 6b      | Explanation for choice of comparators ( <b>Page 7</b> )                                                                                                                                                                                                                                                     |
| Objectives                        | 7       | Specific objectives or hypotheses ( <b>Page 5</b> )                                                                                                                                                                                                                                                         |

1  
2 Trial design 8 Description of trial design including type of trial (eg, parallel group,  
3 crossover, factorial, single group), allocation ratio, and framework (eg,  
4 superiority, equivalence, noninferiority, exploratory) **(Page 5)**  
5  
6  
7

8 **Methods: Participants, interventions, and outcomes**  
9

10 Study setting 9 Description of study settings (eg, community clinic, academic hospital)  
11 ( and list of countries where data will be collected. Reference to where  
12 list of study sites can be obtained **(Page 7)**  
13

14 Eligibility criteria 10 Inclusion and exclusion criteria for participants. If applicable, eligibility  
15 criteria for study centres and individuals who will perform the  
16 interventions (eg, surgeons, psychotherapists) **(6)**  
17  
18

19 Interventions 11a Interventions for each group with sufficient detail to allow replication,  
20 including how and when they will be administered **(Page 7-11)**  
21

22 11b Criteria for discontinuing or modifying allocated interventions for a  
23 given trial participant (eg, drug dose change in response to harms,  
24 participant request, or improving/worsening disease) **(N/A)**  
25

26 11c Strategies to improve adherence to intervention protocols, and any  
27 procedures for monitoring adherence (eg, drug tablet return,  
28 laboratory tests) **(Page 8-10)**  
29

30 11d Relevant concomitant care and interventions that are permitted or  
31 prohibited during the trial **(Page 6)**  
32  
33

34 Outcomes 12 Primary, secondary, and other outcomes, including the specific  
35 measurement variable (eg, systolic blood pressure), analysis metric  
36 (eg, change from baseline, final value, time to event), method of  
37 aggregation (eg, median, proportion), and time point for each  
38 outcome. Explanation of the clinical relevance of chosen efficacy and  
39 harm outcomes is strongly recommended **(Page 5, & Page 11-15)**  
40  
41

42 Participant 13 Time schedule of enrolment, interventions (including any run-ins and  
43 timeline washouts), assessments, and visits for participants. A schematic  
44 diagram is highly recommended (see Figure) **(table 1)**  
45

46 Sample size 14 Estimated number of participants needed to achieve study objectives  
47 and how it was determined, including clinical and statistical  
48 assumptions supporting any sample size calculations **(Page 7)**  
49

50 Recruitment 15 Strategies for achieving adequate participant enrolment to reach  
51 target sample size **(Page 6)**  
52  
53

54 **Methods: Assignment of interventions (for controlled trials)**  
55

56 Allocation:  
57  
58  
59  
60

|    |                |     |                                                                         |
|----|----------------|-----|-------------------------------------------------------------------------|
| 1  |                |     |                                                                         |
| 2  | Sequence       | 16a | Method of generating the allocation sequence (eg, computer-             |
| 3  | generation     |     | generated random numbers), and list of any factors for stratification.  |
| 4  |                |     | (To reduce predictability of a random sequence, details of any          |
| 5  |                |     | planned restriction (eg, blocking) should be provided in a separate     |
| 6  |                |     | document that is unavailable to those who enrol participants or assign  |
| 7  |                |     | interventions <b>(N/A)</b>                                              |
| 8  |                |     |                                                                         |
| 9  |                |     |                                                                         |
| 10 | Allocation     | 16b | Mechanism of implementing the allocation sequence (eg, central          |
| 11 | concealment    |     | telephone; sequentially numbered, opaque, sealed envelopes),            |
| 12 | mechanism      |     | describing any steps to conceal the sequence until interventions are    |
| 13 |                |     | <b>(N/A)</b>                                                            |
| 14 |                |     |                                                                         |
| 15 | Implementation | 16c | Who will generate the allocation sequence, who will enrol participants, |
| 16 |                |     | and who will assign participants to interventions <b>(N/A)</b>          |
| 17 |                |     |                                                                         |
| 18 |                |     |                                                                         |
| 19 | Blinding       | 17a | Who will be blinded after assignment to interventions (eg, trial        |
| 20 | (masking)      |     | participants, care providers, outcome assessors, data analysts), and    |
| 21 |                |     | how <b>(N/A)</b>                                                        |
| 22 |                |     |                                                                         |
| 23 |                | 17b | If blinded, circumstances under which unblinding is permissible, and    |
| 24 |                |     | procedure for revealing a participant's allocated intervention during   |
| 25 |                |     | the trial <b>(N/A)</b>                                                  |
| 26 |                |     |                                                                         |
| 27 |                |     |                                                                         |

### Methods: Data collection, management, and analysis

|    |                 |     |                                                                           |
|----|-----------------|-----|---------------------------------------------------------------------------|
| 28 |                 |     |                                                                           |
| 29 |                 |     |                                                                           |
| 30 | Data collection | 18a | Plans for assessment and collection of outcome, baseline, and other       |
| 31 | methods         |     | trial data, including any related processes to promote data quality (eg,  |
| 32 |                 |     | duplicate measurements, training of assessors) and a description of       |
| 33 |                 |     | study instruments (eg, questionnaires, laboratory tests) along with       |
| 34 |                 |     | their reliability and validity, if known. Reference to where data         |
| 35 |                 |     | collection forms can be found, if not in the protocol <b>(Page 11-15)</b> |
| 36 |                 |     |                                                                           |
| 37 |                 |     |                                                                           |
| 38 |                 | 18b | Plans to promote participant retention and complete follow-up,            |
| 39 |                 |     | including list of any outcome data to be collected for participants who   |
| 40 |                 |     | discontinue or deviate from intervention protocols <b>(Page 7)</b>        |
| 41 |                 |     |                                                                           |
| 42 | Data            | 19  | Plans for data entry, coding, security, and storage, including any        |
| 43 | management      |     | related processes to promote data quality (eg, double data entry;         |
| 44 |                 |     | range checks for data values). Reference to where details of data         |
| 45 |                 |     | management procedures can be found, if not in the protocol <b>(Page</b>   |
| 46 |                 |     | <b>16)</b>                                                                |
| 47 |                 |     |                                                                           |
| 48 |                 |     |                                                                           |
| 49 | Statistical     | 20a | Statistical methods for analysing primary and secondary outcomes.         |
| 50 | methods         |     | Reference to where other details of the statistical analysis plan can be  |
| 51 |                 |     | found, if not in the protocol <b>(Page 16)</b>                            |
| 52 |                 |     |                                                                           |
| 53 |                 | 20b | Methods for any additional analyses (eg, subgroup and adjusted            |
| 54 |                 |     | analyses) <b>(Page 16)</b>                                                |
| 55 |                 |     |                                                                           |
| 56 |                 |     |                                                                           |
| 57 |                 | 20c | Definition of analysis population relating to protocol non-adherence      |
| 58 |                 |     | (eg, as randomised analysis), and any statistical methods to handle       |
| 59 |                 |     | missing data (eg, multiple imputation) <b>(Page 16)</b>                   |
| 60 |                 |     |                                                                           |

## Methods: Monitoring

|                                                                                                                                                                                                                      |                 |     |                                                                                                                                                                                                                                                                                                                                                          |
|----------------------------------------------------------------------------------------------------------------------------------------------------------------------------------------------------------------------|-----------------|-----|----------------------------------------------------------------------------------------------------------------------------------------------------------------------------------------------------------------------------------------------------------------------------------------------------------------------------------------------------------|
| 1<br>2<br>3<br>4<br>5<br>6<br>7<br>8<br>9<br>10<br>11<br>12<br>13<br>14<br>15<br>16<br>17<br>18<br>19<br>20<br>21<br>22<br>23<br>24                                                                                  | Data monitoring | 21a | Composition of data monitoring committee (DMC); summary of its role and reporting structure; statement of whether it is independent from the sponsor and competing interests; and reference to where further details about its charter can be found, if not in the protocol. Alternatively, an explanation of why a DMC is not needed ( <b>Page 16</b> ) |
| 25<br>26<br>27<br>28<br>29<br>30<br>31<br>32<br>33<br>34<br>35<br>36<br>37<br>38<br>39<br>40<br>41<br>42<br>43<br>44<br>45<br>46<br>47<br>48<br>49<br>50<br>51<br>52<br>53<br>54<br>55<br>56<br>57<br>58<br>59<br>60 | Harms           | 22  | Plans for collecting, assessing, reporting, and managing solicited and spontaneously reported adverse events and other unintended effects of trial interventions or trial conduct ( <b>Page 13</b> )                                                                                                                                                     |
|                                                                                                                                                                                                                      | Auditing        | 23  | Frequency and procedures for auditing trial conduct, if any, and whether the process will be independent from investigators and the sponsor ( <b>Page 16</b> )                                                                                                                                                                                           |

## Ethics and dissemination

|                                                                                                                                                                                                                |                               |     |                                                                                                                                                                                                                                                     |
|----------------------------------------------------------------------------------------------------------------------------------------------------------------------------------------------------------------|-------------------------------|-----|-----------------------------------------------------------------------------------------------------------------------------------------------------------------------------------------------------------------------------------------------------|
| 26<br>27<br>28<br>29<br>30<br>31<br>32<br>33<br>34<br>35<br>36<br>37<br>38<br>39<br>40<br>41<br>42<br>43<br>44<br>45<br>46<br>47<br>48<br>49<br>50<br>51<br>52<br>53<br>54<br>55<br>56<br>57<br>58<br>59<br>60 | Research ethics approval      | 24  | Plans for seeking research ethics committee/institutional review board (REC/IRB) approval ( <b>Page 2</b> )                                                                                                                                         |
|                                                                                                                                                                                                                | Protocol amendments           | 25  | Plans for communicating important protocol modifications (eg, changes to eligibility criteria, outcomes, analyses) to relevant parties (eg, investigators, REC/IRBs, trial participants, trial registries, journals, regulators) ( <b>Page 16</b> ) |
|                                                                                                                                                                                                                | Consent or assent             | 26a | Who will obtain informed consent or assent from potential trial participants or authorised surrogates, and how (see Item 32) ( <b>Page 7</b> )                                                                                                      |
|                                                                                                                                                                                                                |                               | 26b | Additional consent provisions for collection and use of participant data and biological specimens in ancillary studies, if applicable ( <b>N/A</b> )                                                                                                |
|                                                                                                                                                                                                                | Confidentiality               | 27  | How personal information about potential and enrolled participants will be collected, shared, and maintained in order to protect confidentiality before, during, and after the trial ( <b>Page 16</b> )                                             |
|                                                                                                                                                                                                                | Declaration of interests      | 28  | Financial and other competing interests for principal investigators for the overall trial and each study site ( <b>Page 23</b> )                                                                                                                    |
|                                                                                                                                                                                                                | Access to data                | 29  | Statement of who will have access to the final trial dataset, and disclosure of contractual agreements that limit such access for investigators ( <b>Page 23</b> )                                                                                  |
|                                                                                                                                                                                                                | Ancillary and post-trial care | 30  | Provisions, if any, for ancillary and post-trial care, and for compensation to those who suffer harm from trial participation ( <b>N/A</b> )                                                                                                        |

- 1  
2  
3  
4  
5  
6  
7  
8  
9  
10  
11  
12  
13  
14  
15
- |                         |     |                                                                                                                                                                                                                                                                                                     |
|-------------------------|-----|-----------------------------------------------------------------------------------------------------------------------------------------------------------------------------------------------------------------------------------------------------------------------------------------------------|
| Dissemination<br>policy | 31a | Plans for investigators and sponsor to communicate trial results to participants, healthcare professionals, the public, and other relevant groups (eg, via publication, reporting in results databases, or other data sharing arrangements), including any publication restrictions <b>(Page 2)</b> |
|                         | 31b | Authorship eligibility guidelines and any intended use of professional writers <b>(Page 23)</b>                                                                                                                                                                                                     |
|                         | 31c | Plans, if any, for granting public access to the full protocol, participant-level dataset, and statistical code <b>(Page 2)</b>                                                                                                                                                                     |

## 16 Appendices

- 17  
18  
19  
20  
21  
22  
23  
24
- |                               |    |                                                                                                                                                                                                             |
|-------------------------------|----|-------------------------------------------------------------------------------------------------------------------------------------------------------------------------------------------------------------|
| Informed consent<br>materials | 32 | Model consent form and other related documentation given to participants and authorised surrogates <b>(Appendix A)</b>                                                                                      |
| Biological<br>specimens       | 33 | Plans for collection, laboratory evaluation, and storage of biological specimens for genetic or molecular analysis in the current trial and for future use in ancillary studies, if applicable <b>(N/A)</b> |

---

25 \*It is strongly recommended that this checklist be read in conjunction with the SPIRIT 2013  
26 Explanation & Elaboration for important clarification on the items. Amendments to the  
27 protocol should be tracked and dated. The SPIRIT checklist is copyrighted by the SPIRIT  
28 Group under the Creative Commons "[Attribution-NonCommercial-NoDerivs 3.0 Unported](https://creativecommons.org/licenses/by-nc-nd/3.0/)"  
29 license.  
30  
31  
32  
33  
34  
35  
36  
37  
38  
39  
40  
41  
42  
43  
44  
45  
46  
47  
48  
49  
50  
51  
52  
53  
54  
55  
56  
57  
58  
59  
60



# BMJ Open

## The Pulmonary Hypertension And Home-Based (PHAHB) Exercise Intervention: Protocol for a Feasibility Study

|                                 |                                                                                                                                                                                                                                                                                                                                                                                                                                                                                                                                                                                                                                                                                                                                               |
|---------------------------------|-----------------------------------------------------------------------------------------------------------------------------------------------------------------------------------------------------------------------------------------------------------------------------------------------------------------------------------------------------------------------------------------------------------------------------------------------------------------------------------------------------------------------------------------------------------------------------------------------------------------------------------------------------------------------------------------------------------------------------------------------|
| Journal:                        | <i>BMJ Open</i>                                                                                                                                                                                                                                                                                                                                                                                                                                                                                                                                                                                                                                                                                                                               |
| Manuscript ID                   | bmjopen-2020-045460.R1                                                                                                                                                                                                                                                                                                                                                                                                                                                                                                                                                                                                                                                                                                                        |
| Article Type:                   | Protocol                                                                                                                                                                                                                                                                                                                                                                                                                                                                                                                                                                                                                                                                                                                                      |
| Date Submitted by the Author:   | 21-Feb-2021                                                                                                                                                                                                                                                                                                                                                                                                                                                                                                                                                                                                                                                                                                                                   |
| Complete List of Authors:       | McCormack, Ciara; Dublin City University, School of Health and Human Performance<br>Kehoe, Brona; Waterford Institute of Technology, Department of Sport & Exercise Science<br>Hardcastle, Sarah; Dublin City University, School of Health and Human Performance; University of Notre Dame, Fremantle, Western Australia, Institute for Health Research<br>McCaffrey, Noel; ExWell Medical<br>McCarren, Andrew; Insight Centre for Data Analytics, Dublin City University, Dublin, Ireland<br>Gaine, Sean; Mater Misericordiae University Hospital, Respiratory Department<br>McCullagh, Brian; Mater Misericordiae University Hospital, Respiratory Department<br>Moyna, Niall; Dublin City University, School of Health & Human performance |
| <b>Primary Subject Heading</b>: | Rehabilitation medicine                                                                                                                                                                                                                                                                                                                                                                                                                                                                                                                                                                                                                                                                                                                       |
| Secondary Subject Heading:      | Respiratory medicine, Sports and exercise medicine, Rehabilitation medicine                                                                                                                                                                                                                                                                                                                                                                                                                                                                                                                                                                                                                                                                   |
| Keywords:                       | REHABILITATION MEDICINE, SPORTS MEDICINE, Respiratory physiology < THORACIC MEDICINE, Rehabilitation medicine < INTERNAL MEDICINE                                                                                                                                                                                                                                                                                                                                                                                                                                                                                                                                                                                                             |
|                                 |                                                                                                                                                                                                                                                                                                                                                                                                                                                                                                                                                                                                                                                                                                                                               |

SCHOLARONE™  
Manuscripts



I, the Submitting Author has the right to grant and does grant on behalf of all authors of the Work (as defined in the below author licence), an exclusive licence and/or a non-exclusive licence for contributions from authors who are: i) UK Crown employees; ii) where BMJ has agreed a CC-BY licence shall apply, and/or iii) in accordance with the terms applicable for US Federal Government officers or employees acting as part of their official duties; on a worldwide, perpetual, irrevocable, royalty-free basis to BMJ Publishing Group Ltd ("BMJ") its licensees and where the relevant Journal is co-owned by BMJ to the co-owners of the Journal, to publish the Work in this journal and any other BMJ products and to exploit all rights, as set out in our [licence](#).

The Submitting Author accepts and understands that any supply made under these terms is made by BMJ to the Submitting Author unless you are acting as an employee on behalf of your employer or a postgraduate student of an affiliated institution which is paying any applicable article publishing charge ("APC") for Open Access articles. Where the Submitting Author wishes to make the Work available on an Open Access basis (and intends to pay the relevant APC), the terms of reuse of such Open Access shall be governed by a Creative Commons licence – details of these licences and which [Creative Commons](#) licence will apply to this Work are set out in our licence referred to above.

Other than as permitted in any relevant BMJ Author's Self Archiving Policies, I confirm this Work has not been accepted for publication elsewhere, is not being considered for publication elsewhere and does not duplicate material already published. I confirm all authors consent to publication of this Work and authorise the granting of this licence.

## PHAHB Intervention Protocol

1  
2  
3  
4  
5 **1 The Pulmonary Hypertension And Home-Based (PHAHB) Exercise Intervention:**  
6  
7  
8 **2 Protocol for a Feasibility Study**  
9  
10  
11  
12  
13  
14

15 4 *Ciara McCormack<sup>a\*</sup>, Brona Kehoe<sup>b</sup>, Sarah J. Hardcastle<sup>a,c</sup>, Noel McCaffrey<sup>d</sup>, Andrew*  
16  
17 5 *McCarren<sup>e</sup>, Sean Gaine<sup>f</sup>, Brian McCullagh<sup>f</sup>, Niall M. Moyna<sup>a</sup>*  
18  
19  
20  
21  
22  
23

24 7 <sup>a</sup> School of Health & Human Performance, Dublin City University, Dublin, Ireland.

25  
26  
27  
28 8 <sup>b</sup> Department of Sport & Exercise Science, Waterford Institute of Technology, Waterford City,  
29  
30 9 Ireland.

31  
32  
33  
34 10 <sup>c</sup> Institute for Health Research, University of Notre Dame, Fremantle, Western Australia.

35  
36  
37 11 <sup>d</sup> ExWell Medical, Dublin, Ireland.

38  
39  
40  
41 12 <sup>e</sup> Insight Centre for Data Analytics, Dublin City University, Dublin, Ireland.

42  
43  
44 13 <sup>f</sup> Pulmonary Hypertension Unit, Mater Misericordiae University Hospital Dublin 7, Ireland  
45  
46  
47  
48  
49  
50

51 15 \*Ciara McCormack

52  
53  
54 16 Telephone: 01 700 8472

55  
56  
57  
58 17 Email: [Ciara.mccormack26@mail.dcu.ie](mailto:Ciara.mccormack26@mail.dcu.ie)  
59  
60

## PHAHB Intervention Protocol

1  
2  
3  
4 18 *School of Health & Human Performance, Dublin City University, Glasnevin Campus,*  
5  
6  
7 19 *Glasnevin, Dublin 9, Ireland.*  
8  
9

10 20 *Word Count: 3998*  
11  
12  
13  
14 21  
15  
16  
17 22  
18  
19  
20  
21 23  
22  
23  
24 24  
25  
26  
27 25  
28  
29  
30

31 26 **ABSTRACT**  
32  
33  
34  
35

36 27 **Introduction:** Novel therapies for pulmonary hypertension (PH) have improved survival and  
37  
38 28 slowed disease progression. However, patients still present with symptoms of exertional  
39  
40  
41 29 dyspnoea and fatigue, which impacts their ability to perform activities of daily living, reduces  
42  
43  
44 30 exercise tolerance and impairs their quality of life (QoL). Exercise training has shown to be  
45  
46 31 safe and effective at enhancing QoL and physical function in PH patients, yet it remains an  
47  
48  
49 32 under-utilized adjunct therapy. Most exercise training for PH patients has been offered through  
50  
51 33 hospital-based programmes. Home-based exercise programmes provide an alternative model  
52  
53  
54 34 that has the potential to increase the availability and accessibility of exercise training as an  
55  
56 35 adjunct therapy in PH. The purpose of this study is to investigate the feasibility, acceptability,  
57  
58  
59 36 utility and safety of a novel remotely supervised home-based PH exercise programme.  
60

## PHAHB Intervention Protocol

1  
2  
3  
4 37 **Methods:** Single arm intervention with a pre/post comparisons design and a follow up  
5  
6  
7 38 maintenance phase will be employed. Eligible participants (n= 25) will be recruited from the  
8  
9 39 Mater Misericordiae University Hospital PH Unit. Participants will undergo a 10-week home-  
10  
11 40 based exercise program, with induction training, support materials, telecommunication support  
12  
13  
14 41 and health coaching sessions followed by a 10-week maintenance phase. The primary  
15  
16 42 outcomes are feasibility, acceptability, utility and safety of the intervention. Secondary  
17  
18 43 outcomes will include the impact of the intervention on exercise capacity, physical activity,  
19  
20 44 strength, health-related quality of life and exercise self-efficacy.

21  
22  
23  
24 45 **Ethics and dissemination:** Ethics approval has been obtained from the Mater Misericordiae  
25  
26 46 Institutional Review Board REF:1/378/2032 and Dublin City University Research Ethics  
27  
28 47 DCUREC/2018/246. A manuscript of the results will be submitted to a peer-reviewed journal  
29  
30 48 and results will be presented at conferences, community and consumer forums and hospital  
31  
32 49 research conferences. Trial Registration: ISRCTN Registry: ISRCTN83783446. Protocol  
33  
34 50 version. 2.0.

35  
36  
37  
38  
39  
40  
41 51 **Keywords:** Pulmonary Hypertension, exercise rehabilitation, physical activity, exercise  
42  
43 52 training, home-based, remote delivery, wearable technology, health coaching.

44  
45  
46  
47  
48  
49 53 **Strengths and limitations of this study**

- 50  
51  
52 54 • This is the first study to assess the feasibility, utility, safety and acceptability of a novel  
53  
54 55 distance-based exercise intervention for PH patients

PHAHB Intervention Protocol

1  
2  
3  
4  
5  
6  
7  
8  
9  
10  
11  
12  
13  
14  
15  
16  
17  
18  
19  
20  
21  
22  
23  
24  
25  
26  
27  
28  
29  
30  
31  
32  
33  
34  
35  
36  
37  
38  
39  
40  
41  
42  
43  
44  
45  
46  
47  
48  
49  
50  
51  
52  
53  
54  
55  
56  
57  
58  
59  
60

- 56 • The intervention is pragmatic and scalable and could be integrated into existing  
57 healthcare pathways.
- 58 • As PH is a rare disease with a small population size within Ireland, there is a lack of a  
59 usual care control group which is a limitation of the study.

60

For peer review only

## PHAHB Intervention Protocol

61 **INTRODUCTION**

62 Despite earlier diagnosis and improved pharmaceutical therapies, many PH participants  
63 continue to experience exertional symptoms of dyspnoea and fatigue, which leads to a  
64 reduction in functional capacity and in turn, quality of life (QoL). Consequently, there is greater  
65 recognition for a more holistic approach to PH treatment beyond pharmacological therapies[1].

66 Exercise rehabilitation and physical activity (PA) interventions have continuously  
67 demonstrated effectiveness as adjuvant therapies for improving exercise capacity and QoL in  
68 a spectrum of cardio-pulmonary disorders[2-5]. Although research investigating exercise in PH  
69 is an emerging field of study, the body of evidence regarding its efficacy continues to grow.  
70 Recent systematic reviews and meta-analyses have reported improvements in exercise capacity  
71 and QoL in PH [6-11], which has prompted a renewed focus on exercise training and  
72 pulmonary rehabilitation for PH patients.

73 In the 2015, the European Society of Cardiology /European Respiratory Society  
74 published guidelines for the diagnosis and treatment of pulmonary hypertension, it was  
75 recommended that exercise training should be implemented by specialist PH centres as an  
76 adjunct to medical therapy for stable PH participants [12]. Currently, the optimal mode,  
77 intensity, and duration of exercise training, and the characteristics of participants most likely  
78 to benefit from exercise training are poorly understood [13]. To date, the centre-based  
79 Hiedelberg rehabilitation program remains the gold standard exercise program in PH. It  
80 involves an intensive 3-week in-patient induction phase, with a continued multimodality,

## PHAHB Intervention Protocol

1  
2  
3  
4 81 monitored outpatient period [14]. Despite improvements in exercise capacity, muscle function,  
5  
6  
7 82 QoL and pulmonary haemodynamics, the initial in-patient phase is resource intensive to  
8  
9  
10 83 operate and roll out [15].  
11  
12  
13

14 84 An alternative and pragmatic approach, found to be as effective as a supervised exercise  
15  
16 85 programme in cardiac rehabilitation, is a home-based model of delivery [16]. Home-based  
17  
18  
19 86 interventions also provide solutions to common barriers to participation in centre-based  
20  
21  
22 87 programs such as access and transport issues, and are less expensive [17]. Further, patient  
23  
24  
25 88 populations express a preference for unsupervised, self-paced, low-moderate intensity PA,  
26  
27 89 specifically walking [18-19]. Through the use of telehealth, distance-based programmes could  
28  
29  
30 90 potentially offer an alternative mode of delivery for exercise training to increase adherence,  
31  
32 91 availability and affordability for PH patients.  
33  
34  
35

36 92 Although the few studies examining the beneficial effects of home-based exercise  
37  
38  
39 93 training in PH are promising [20-21] none included strategies to maximise adherence. An  
40  
41  
42 94 evidence-based approach to implement lifestyle changes requires the implementation of health  
43  
44  
45 95 behaviour change strategies grounded in behaviour change theory [22]. Evidence-based  
46  
47 96 behaviour change techniques (BCT's) can be used to improve intervention effectiveness [23].  
48  
49 97 For example, the combination of the following BCT's: self-monitoring; goal setting; providing  
50  
51  
52 98 feedback on performance; and, review of behaviour goals, is associated with increased  
53  
54  
55 99 intervention effectiveness in PA interventions [24]. Interventions that meet the support needs  
56  
57 100 and offer opportunities for self-monitoring have been found to be effective for improving PA  
58  
59 101 in other chronic disease groups[25]. Wearable technology holds great potential as an easy to  
60



## PHAHB Intervention Protocol

1  
2  
3  
4 102 use, low cost self-monitoring tool with continuous feedback [26] and are perceived as  
5  
6  
7 103 acceptable and useful for individuals with chronic diseases [27]. Through the use of telehealth,  
8  
9  
10 104 distance-based programmes could potentially offer an alternative mode of delivery for exercise  
11  
12 105 training to increase adherence, availability and affordability for PH patients. The aim of this  
13  
14 106 study is to assess the feasibility, acceptability, utility and safety of a novel home-based exercise  
15  
16  
17 107 training programme for PH patients.

## 108 **METHODS AND ANALYSIS**

### 109 **Study Design**

110 The study will employ a single group pre-post-intervention design with a follow up  
111 maintenance phase. The purpose of the maintenance phase is to assess if the intervention  
112 facilitates the adoption of independent exercise in participants when formal support is removed.  
113 The study will adhere to the Standard Protocol Items: Recommendations for Interventional  
114 Trials Reporting Template (SPIRIT)[28]. Participants will complete assessments at baseline  
115 (T1), after the 10-week intervention (T2) and at 20-weeks follow up (T3).

### 117 **Eligibility Criteria**

118 Inclusion criteria are male or female > 18 years, with a diagnosis of PH (WHO Groups  
119 I and IV) by right heart catheterisation showing baseline mean pulmonary arterial pressure  $\geq 25$   
120 mm Hg, pulmonary vascular resistance  $\geq 240$  dyne s cm<sup>-5</sup>, pulmonary capillary wedge pressure  
121  $\leq 15$  mmHg and receiving optimized conventional PH therapy. Participants must be clinically  
122 stable with no medication changes in the 2 months prior to enrolment.

## PHAHB Intervention Protocol

1  
2  
3  
4 123 Exclusion criteria include PH of any cause other than outlined in the inclusion criteria such as  
5  
6 124 PH from left heart disease or lung disease/hypoxia (WHO Groups II and III) , pregnancy, signs  
7  
8  
9 125 of right heart decompensation, acute infection and pyrexia, change in disease-targeted therapy  
10  
11 126 within the last 2-months, scheduled to receive an investigational drug during the course of the  
12  
13 127 study, FEV1/FVC <0.5, total lung capacity <70% of the normal value, active liver disease,  
14  
15 128 porphyria, elevations of serum transaminases >3 x upper limit of normal (ULN), bilirubin >1.5  
16  
17 129 x ULN, haemoglobin concentration <75% of the lower limit of normal, systolic blood pressure  
18  
19 130 <85 mmHg, active myocarditis, unstable angina pectoris, exercise induced ventricular  
20  
21 131 arrhythmias, decompensated heart failure, hypertrophic obstructive cardiomyopathy or  
22  
23 132 impaired left ventricular function.  
24  
25  
26  
27  
28  
29  
30  
31  
32

133  
134 **Participant Recruitment**

35 135 Participants will be recruited from the Pulmonary Hypertension Unit at the Mater  
36  
37 136 Misericordiae University Hospital, Dublin, Ireland. Eligible participants will be invited to  
38  
39 137 participate during their routine 3-6 month clinic visit. They will be given a verbal explanation  
40  
41 138 of the study and provided with an information sheet by their PH Specialist (SG/BMC) or a  
42  
43 139 member of their clinical team. After receiving the information, potential participants will have  
44  
45 140 the option to speak on the day to a member of the research team or to receive a follow-up phone  
46  
47 141 call within 1-2 days. Participants will have the opportunity to ask questions and will have time  
48  
49 142 to consider their participation. Written consent will be obtained by mail.  
50  
51  
52  
53  
54  
55  
56  
57  
58  
59  
60

## PHAHB Intervention Protocol

144 **Sample Size**

145 Pilot study sample size typically ranges from 24 to 50[29-31]. We estimate a target  
146 sample size of 25 to be sufficient for this feasibility study [30].

147 **Primary Outcomes**

148 **Feasibility:** Assessed by participant recruitment (enrolment as a proportion of eligible  
149 participants) and retention (proportion that completed all assessments); (ii) engagement with  
150 the intervention measured according to attendance at induction sessions and health coaching  
151 sessions and adherence, defined as the percentage of home-based exercise sessions recorded  
152 by participants who complete the intervention assessed via log books and weekly calls) and  
153 (iii) by examining delivery as intended (as per protocol) and health coach perceptions  
154 concerning how patients' received the intervention components. This will be captured  
155 immediately after each session in order to keep a record of how delivery was received in  
156 relation to the planned delivery ( e.g., if a participants required extra time or further support  
157 following the induction training session).

158 **Acceptability and utility:** Assessed through self-report questionnaires completed at T2 and  
159 interviews. The questionnaire will assess participant perceptions of intervention  
160 appropriateness, effectiveness, quality, accessibility/usability, intrusiveness, and overall  
161 enjoyment and attitude towards the intervention. Semi-structured interviews with a sub-set of  
162 participants (~ n=12) will be conducted within 2-weeks of completing the T2 assessment. The  
163 interviews will further explore acceptability and utility of the intervention including  
164 perceptions concerning exercise prescription, adherence to different components of the  
165 intervention, in addition to the facilitating and hindering factors to participation. Participants

## PHAHB Intervention Protocol

1  
2  
3  
4 166 will also be asked to offer suggestions for improvement and implementation. Interviews will  
5  
6  
7 167 be conducted via telephone or online platforms (i.e., Zoom) and will be audio-recorded and  
8  
9 168 transcribed.

10  
11  
12 169 **Safety:** Participants will be instructed to inform researchers immediately of any adverse  
13  
14 170 advent. In addition, participants will be questioned about adverse events directly related to  
15  
16 171 participation in the exercise intervention during a bi-weekly support call.  
17  
18  
19

20 172

21  
22  
23 173 **Secondary Outcomes**

24  
25  
26 174 **Exercise capacity:** Assessed using the 6-min walk test (6MWT). The test will be administered  
27  
28 175 according to the European Respiratory Society Guidelines [32] and will be conducted at home  
29  
30 176 using detailed step-by-step video and written instructions and remotely supervised via  
31  
32 177 phone/teleconferencing by a researcher (CMC). A family member/friend will assist with  
33  
34 178 conducting the test, including measuring blood pressure and SpO<sub>2</sub> with guidance from the  
35  
36 179 researcher before and after the test. Subjective symptoms (RPE and dyspnoea- Borg Dyspnoea  
37  
38 180 Scale 0-10) will be recorded before and after the test. The Frontier X chest worn monitor will  
39  
40 181 be worn during the test to provide real-time feedback. The assistant will ask the participant to  
41  
42 182 call out their SpO<sub>2</sub> and HR at each minute of the test. Standard encouragement will be delivered  
43  
44 183 by the assistant, with researcher prompting, if needed.  
45  
46  
47  
48  
49  
50

51 184

52  
53  
54 185 **Muscular strength:** Lower body muscle strength will be assessed using the 30-sec sit-to-stand  
55  
56 186 test (STS) from a seat height of 40-45 cm. The STS is a commonly used field-based measure  
57  
58  
59  
60

## PHAHB Intervention Protocol

1  
2  
3  
4 187 of functional lower limb muscle strength, particularly in clinical and elderly populations. The  
5  
6  
7 188 test will be conducted in each participant's home via teleconference. A researcher (CMC) will  
8  
9  
10 189 provide a demonstration, time the test, and count the repetitions. Each participant will perform  
11  
12 190 two trials separated by 5-min, with the best score being recorded.  
13  
14

191

15  
16  
17  
18 192 **Physical activity behaviour:** ActivPAL<sup>3</sup> micro activity monitors (PAL Technologies Ltd.  
19  
20 193 Glasgow, Scotland) will be used to assess free living activity behaviour. The device samples  
21  
22  
23 194 at 20Hz for 15-sec epochs and measures bodily accelerations using triaxial accelerometer. An  
24  
25 195 inbuilt inclinometer measures thigh inclination. Proprietary algorithms classifies activities into  
26  
27  
28 196 sitting/lying time, standing time, stepping time, step count and activity counts. Participants will  
29  
30 197 be mailed the accelerometer together with detailed wear instruction and provided with a  
31  
32  
33 198 prepaid postage envelope to return the device. They will be instructed to wear the device on  
34  
35 199 the anterior aspect of their right thigh continuously for 7-days, except during water immersion  
36  
37  
38 200 activities (i.e., swimming and bathing). The ActivPAL is a valid and reliable measure of  
39  
40 201 activity and sedentary behaviour [33-34].  
41  
42

202

203 **Psychological Outcomes and Mediators**

44  
45  
46  
47  
48  
49 204 **Quality of life:** The Medical Outcomes Study Short-Form 36-Item Survey (SF-36) is a well-  
50  
51  
52 205 validated, generic questionnaire [35] consisting of physical functioning, physical role  
53  
54 206 functioning, bodily pain, and general health and the four mental subscales of vitality, social  
55  
56  
57 207 functioning, emotional role functioning and mental health. The Cambridge Pulmonary  
58  
59 208 Hypertension Outcome Review (CAMPHOR)[36] was designed as a disease-specific health-  
60

## PHAHB Intervention Protocol

209 related QoL measure for PH patients. It is widely used as a clinical and research tool in PH. It  
210 is made up of three dimensions which assess symptoms (25 items) functioning (15 items) and  
211 quality life (25 items).

212 **Fatigue:** The Fatigue Severity Scale (FSS)[37] measures the patient's perception of the  
213 influence of fatigue on physical and social functioning through responses to nine different  
214 physical and social functioning situations. The FSS is a valid tool for assessing fatigue across  
215 various health conditions[38].

216 **Self-regulatory self-efficacy for exercise:** Assessed using a modified 11-item scale[39-40],  
217 which provide information on task, scheduling and recovery self-efficacy. Questions begin  
218 with the stem "*How confident are you that you can...*" and include items such as "*plan exercise*  
219 *sessions that will be at least moderately difficult (e.g. have you breathing a little hard, your*  
220 *heart rate increases)?"*. Participants rate their confidence on a 0-10 Likert scale, with a higher  
221 score indicating greater self-efficacy for exercise (Cronbach alpha,  $\alpha = .951$ ).

222 **Intentions to exercise:** Two items will measure intention to engage in moderate-intensity  
223 physical activity for 150-min/week in the next 10-weeks, based on previously established  
224 measures[41].

225 **Outcome expectations:** Ten-items will assess outcome expectations. Five-items are derived  
226 from the validated exercise pros subscale [42] and 5-items to assess outcomes related to  
227 common symptoms reported in PH, 'such as breathlessness' [43].

228 **Social support:** Social support for exercise from family and friends scale[44] uses a 20-item  
229 scale to assess support from family and friends respectively. Responses will be recorded on a

## PHAHB Intervention Protocol

230 Likert scale of 1-5, with higher scores representing greater social support. (Cronbach alpha,  
231 family  $\alpha = .926$ , friends  $\alpha = .921$ ).

232

233 Outcome assessments will take place at baseline (T1), after the 10-week intervention (T2) and  
234 at 20-weeks follow up (T3). Semi-structured interviews will be conducted at T2 to assess  
235 patient's perspective on program acceptability and feasibility and at T3 to assess the follow up  
236 phase. Table 1 outlines the timeline of the assessments.

**237 Procedure**

238 Participants will complete all assessments, induction training and exercise training in  
239 their own home and will maintain in contact with researchers via telecommunication  
240 technologies (phone, videoconferencing and email). Following consent, a baseline assessment  
241 will be conducted (see Table 1) and participants will be provided with an accelerometer to  
242 record their activity for the following week, along with a prepaid postage envelope to return  
243 device. The assessment procedure will be repeated at T2 (10-weeks) and T3 (20-weeks).

244 Participants will be provided with a home exercise bike (NordicTrack GX 2.7U), a wearable  
245 tracker watch (The Fitbit Charge 3), pulse oximeter (SafeHeart SpO<sub>2</sub> monitor), real time single  
246 lead ECG/HR/respiratory rate monitor (Frontier X), blood pressure monitor (Beurer BM44), a  
247 TheraBand, exercise manual, exercise diary and access to online videos. The exercise manual  
248 was partly based on the design of previous PA intervention in chronic disease - PPARCS [26]  
249 and WATTAP [45] trials and also our formative research with PH patients. The formative  
250 research highlighted the lack of understanding of the benefits of exercise, the importance of  
251 self-regulation strategies to support motivation and exercise engagement and the desire for

## PHAHB Intervention Protocol

1  
2  
3  
4 252 visual picture and instruction of exercise. Concerns of breathlessness and energy management  
5  
6  
7 253 were also evident in interviews with PH patients and integrated into the exercise manual. The  
8  
9 254 manual offers a comprehensive, patient-friendly resource detailing; 1) general information  
10  
11 255 about the study; 2) useful links and contacts; 3) background information on PH; 4) education  
12  
13  
14 256 regarding exercise safety and the benefits of physical activity; 5) workbook style sections on  
15  
16  
17 257 motivation, goal setting, overcoming barriers and psychosocial support; 6) managing  
18  
19 258 breathlessness; 7) exercise intensity and limits; 8) guided home exercises with written and  
20  
21  
22 259 visual details and advice on progression; and 9) advice on pacing and energy conservation.  
23  
24 260 Participants will receive video clips of a qualified exercise specialist performing the exercises.  
25  
26  
27 261 Participants will be encouraged to refer to the video to ensure adherence to correct technique.  
28  
29 262 Online videos will provide a visual demonstration of each exercise. Participants will be  
30  
31  
32 263 provided with an exercise diary as a tool to record their activity and effort. BCTs will be  
33  
34  
35 264 integrated in the intervention through wearable technology devices, the use of print and visual  
36  
37 265 materials and health coaching and support calls.  
38  
39  
40 266 The 10-week intervention consists of the following components: Three 60-90 min induction  
41  
42 267 sessions (week 0 and 1), up to five 30-min support health coaching sessions (at week 2, 3, 5,  
43  
44  
45 268 7, 9) and 3-5 weekly home-based exercise sessions. The intervention will end prior to T2  
46  
47 269 assessment. Participants will continue to have access to the exercise manual, bike and Fitbit  
48  
49  
50 270 during the maintenance phase.

51  
52  
53 27154  
55  
56 272 ***Induction Training***  
57  
58  
59  
60



## PHAHB Intervention Protocol

273 Induction training (1:1), via video conferencing, is a key component to ensure  
274 patients are confident to exercise at home and understand the appropriate exercise intensity and  
275 how to exercise safely. Participants will be encouraged to involve a family member, friend or  
276 carer in the induction training. The sessions will focus on the following topics:

277 *Session 1 - Introduction*; Education on PH and benefits of PA for PH. Familiarisation with  
278 intervention materials/equipment and self-monitoring.

279 *Session 2 - Exercise Safety and Exercise Demonstration*; The session will focus on recognizing  
280 exercise limits, warning signs, and managing exercise intensity. Visual demonstrations of  
281 breathing techniques and aerobic, strength, and respiratory training will be provided, with the  
282 opportunity for behavioural practice during the session to check technique and instil  
283 confidence.

284 *Session 3 - Recap*; Exercise demonstrations and key safety points will be reviewed. Any issues  
285 regarding intervention materials/equipment will be addressed and participant goals will be  
286 reviewed, alongside additional tips for family/friend support and motivation.

### 288 ***Health Coaching Sessions***

289 The health coaching sessions (via videoconferencing) will use BCTs to foster exercise  
290 adherence, motivate and provide support. Over the 5 sessions the topics will include; benefits  
291 of exercise, goal setting, action planning, self-monitoring, identification and management of  
292 barriers to exercise, problem solving and feedback on behaviour, with the option for

## PHAHB Intervention Protocol

293 participants to complete formal paperwork in the intervention manual. If required, additional  
294 support will be available outside of scheduled sessions.

295 Participants will be encouraged to wear the Fitbit Charge 3 daily during the intervention. The  
296 Fitbit data will be used to guide individually tailored goals, assess adherence to exercise and  
297 overall daily PA and as tool to provide feedback to the researcher and participants.

298

299 ***Exercise Program***

300 Participants will complete a 10-week individualised, home-based exercise programme.

301 The programme will be prescribed using the FITT principle (Frequency, Intensity, Time and  
302 Type) and will employ a multimodal approach that integrates aerobic, resistance and  
303 respiratory training. The goals for each component are outlined in the sections below. These  
304 are aspirational goals that may not be realistic for all participants. Exercise prescription will  
305 be individualized based on their baseline PA levels, 6-min walk test distance (6MWD) and  
306 physical capabilities. The modified Borg rating of perceived exertion (RPE) scale[46] will be  
307 used to help prescribe exercise intensity. The RPE scale is a psychophysiological measurement  
308 that translates physical stimuli to a psychological construct of perceived exertion and has been  
309 validated in other clinical groups[47]. Participants will aim to achieve an RPE of 3 (moderate)  
310 initially. Based on individual progress an RPE of 4 (somewhat hard) may be advised for some  
311 participants. The exercise program will include:

312 *Aerobic Training*; Participants will initially aim will be to undertake a minimum of 10-min of  
313 structured aerobic exercise involving walking, cycling or a combination on  $\geq 3$  d/week.

314 Participants will be allowed to perform this exercise in a single bout, or accumulate it in bouts

## PHAHB Intervention Protocol

1  
2  
3  
4 315 of at least 5-min in duration. The duration will be progressively increased, with the goal of  
5  
6 316 accumulating  $\geq 30$  min on  $\geq 5$  d/week.

7  
8  
9 317 *Resistance Training;* Participants will initially undertake resistance training on 2 d/week,  
10  
11 318 involving a single set of 6-8 repetitions of upper and lower extremity and whole body exercises.  
12  
13 319 Training volume will progressively increase with the goal of completing 2-3 sets of 10-12 reps  
14  
15 320 of 4-6 exercises on three non-consecutive days. Participants will use pursed lip breathing to  
16  
17 321 help airways stay open during exhalation. Bodyweight resistance will be used initially and  
18  
19 322 based on individual ability, TheraBand's, water bottles or light dumbbells will be introduced.

20  
21 323 *Respiratory Training;* Participants will initially perform 10-min of respiratory training at least  
22  
23 324 twice a week, involving a combination of stretching, breathing techniques (e.g., pursed lip,  
24  
25 325 diaphragmic and slow breathing), and respiratory muscle strengthening exercises. Training  
26  
27 326 volume will progressively increase with the goal of completing 15/20 min of accumulated  
28  
29 327 respiratory training on  $\geq 3$  d/week. Participants can progress to use a TheraBand to complete  
30  
31 328 respiratory training.

32  
33 329 Participants will wear a Frontier X device (receiver attached to a strap place around the chest)  
34  
35 330 during exercise sessions. The first 2-weeks will be monitored by researchers and then  
36  
37 331 periodically monitored. This will allow access to real time ECG, heart rate (HR), respiratory  
38  
39 332 rate and cadence. Oxygen saturation will be monitored and participants will be instructed to  
40  
41 333 stop exercising if the SpO<sub>2</sub> value drops below 88%, as per guidelines[48]. Participants will  
42  
43 334 document any adverse events and report to the research team immediately.

44  
45  
46  
47  
48  
49  
50  
51  
52  
53  
54  
55  
56 335

## PHAHB Intervention Protocol

**336 Data Management**

337 The trial will be overseen by the trial management group, consisting the principal  
338 investigator, the trial-coordinator and health coach. They will meet every 4-weeks and will  
339 oversee all aspects of the conduct of the trial including performing safety oversight activities.  
340 Individual data will be de-identified, coded and entered. Each participant will be assigned a  
341 personal identification code (PIC), which will be used on all case report forms and in all  
342 electronic databases. Prior to any statistical analysis, all variables will be checked for missing,  
343 impossible and improbable values. Impossible and improbable values will be defined by  
344 clinical opinion and will include values that are outside three standard deviations of the mean  
345 value.

**347 Statistical Analysis**

348 Statistical analysis of quantitative data will be performed using SPSS Version 24. Prior  
349 to statistical analysis, the Shapiro-Wilks test will be applied to check for normality. Continuous  
350 variables will be reported as mean (range), mean (standard deviation) or median and inter-  
351 quartile range, depending on distribution, and categorical variables as frequency (%).  
352 Descriptive analyses will be undertaken to summarise participant characteristics and the  
353 quantitative data of the intervention feasibility, acceptability and utility. Qualitative data from  
354 post-trial interviews and researcher field notes will be analyzed using inductive thematic  
355 analysis to identity common themes[49]. A linear mixed model analysis (MMA) will be used  
356 to examine the impact of time in this study . A MMA is a suitable approach to modelling time  
357 series data which contains repeated measures [50]. The MMA does not require complete data

## PHAHB Intervention Protocol

358 sets and does not exclude participants with missing data [51]. Furthermore, MMA has less  
359 stringent assumptions than other repeated measures models (such as analysis of variance) and  
360 also exhibits increased power to detect treatment effects. The data will adjust for confounding  
361 variables, such as age, baseline line fitness, gender and PH group.

### 362 **Patient and Public Involvement**

363 Formative qualitative research took place with PH patients during intervention  
364 development stages. Semi-structured phone interviews (N=19) were conducted providing  
365 insight into patient barriers and motivators to PA, and exercise preferences. The findings fed  
366 into the design of the intervention along with PH clinician input. A patient representative  
367 provided opinions on the study protocol, patient-facing documentation (e.g., Participants  
368 Information Sheet) and intervention material (e.g., exercise manual) to ensure it was patient  
369 friendly.

### 370 **Discussion**

371 The promise of exercise training in the treatment and management of PH has gained  
372 significant interest over the past two decades. The observed positive effects of exercise  
373 programs on patients' exercise capacity, functional capacity and QoL[52] make a strong  
374 argument for the inclusion of exercise as an adjunctive therapy for stable PH patients[53].  
375 Considering that structured and resource-intensive hospital-based exercise programs are  
376 unlikely to be scalable, it is an opportune time to assess the efficacy, safety and impact of  
377 home-based programs as an alternative mode of delivery for PH patients.

## PHAHB Intervention Protocol

1  
2  
3  
4 378 A home-based exercise program may eliminate many of the barriers associated with in-  
5  
6  
7 379 patients or out-patients setting such as transportation issues, location, long wait periods for  
8  
9 380 availability and accessibility for patients. A recent review of exercise interventions in PH by  
10  
11  
12 381 Ozemek and colleagues [53] highlighted the need for inclusion of home exercise programs to  
13  
14 382 allow patients achieve the optimal 5 to 6 days of structured exercise.

15  
16  
17 383 This study will utilise a remote delivery for exercise training with the use of telehealth  
18  
19  
20 384 methods, wearable technology, performance feedback and behavioural support to deliver and  
21  
22  
23 385 monitor the intervention. The aim is to eliminate the burden on patients to attend several times  
24  
25  
26 386 per week to an outpatient clinic, accommodate resource availability, make the program  
27  
28 387 achievable in a 'real world' setting and improve the reach beyond the traditional healthcare  
29  
30 388 facilities. The follow-up post intervention (T3) phase will provide insight into whether  
31  
32  
33 389 behavioural support is necessary in order for PH patients to remain physically active.  
34  
35  
36 390 Furthermore, it will allow us to assess resource needs in future home-based exercise  
37  
38 391 programmes such as the provision of specific exercise equipment and the use of ubiquitous,  
39  
40 392 low cost devices to monitor activity and safety (e.g. bike, wearable activity tracker). PH is  
41  
42  
43 393 considered a rare disease and with support centralised, remote services, which include  
44  
45  
46 394 assessment of patient progress are required. Remote assessment of outcomes may remove  
47  
48 395 threats to external validity and evaluation of the feasibility of such assessment will address the  
49  
50 396 goals of implementation science to close the research-to-practice gap and support  
51  
52  
53 397 implementation and scale up of evidence-based interventions[54].

54  
55  
56 398 To our knowledge, this will be the first study to employ the use of evidence-based BCTs  
57  
58  
59 399 to examine the feasibility, utility and efficacy of a remote home-based approach to exercise  
60

## PHAHB Intervention Protocol

1  
2  
3  
4 400 training for medically stable PH patients. The secondary aims of this study are to evaluate  
5  
6 401 whether this approach leads to improvement in selected indices of physical and psychological  
7  
8  
9 402 health.

10  
11  
12 403 PH is a rare, debilitating condition with most clinics centralized and limited community  
13  
14 404 resources available. Telehealth holds significant potential to meet the growing support for  
15  
16 405 exercise training to be included as an adjunct therapy by offering remote training and support,  
17  
18 406 which is key to long-term implementation of exercise training for the PH population. It  
19  
20 407 provides a service that is more accessible and may potentially offer a more affordable enhanced  
21  
22 408 level of care. Our current understanding is limited concerning the acceptability, feasibility and  
23  
24 409 utility of a home-program for stable PH patients. This study will help gain a valuable insight  
25  
26 410 into this gap in knowledge.  
27  
28  
29  
30  
31  
32  
33  
34 411

35  
36  
37 412 **Ethics and dissemination:** Ethics approval has been obtained from the Mater Misericordiae  
38  
39 413 Institutional Review Board REF:1/378/2032 and Dublin City University Research Ethics  
40  
41 414 DCUREC/2018/246. A manuscript of the results will be submitted to a peer-reviewed journal  
42  
43 415 and results will be presented at conferences, community and consumer forums and hospital  
44  
45 416 research conferences. Trial Registration: ISRCTN Registry: ISRCTN83783446. Protocol  
46  
47 417 version. 2.0  
48  
49

50  
51 418  
52 419  
53  
54  
55  
56  
57  
58  
59  
60

## PHAHB Intervention Protocol

420 **References**

- 421 1. Gaine S, McLaughlin V. Pulmonary arterial hypertension: tailoring treatment to risk  
422 in the current era. *Eur Respir Rev.* 2017;26(146):170095.  
423 doi:10.1183/16000617.0095-2017.
- 424 2. Taylor RS, Sagar VA, Davies EJ, et al. Exercise-based rehabilitation for heart  
425 failure. *Cochrane Database Syst Rev.* 2014;2014(4):CD003331.  
426 doi:10.1002/14651858.CD003331.pub4.
- 427 3. Buys R, Avila A, Cornelissen VA. Exercise training improves physical fitness in  
428 patients with pulmonary arterial hypertension: a systematic review and meta-analysis  
429 of controlled trials. *BMC Pulm Med.* 2015;15:40. doi:10.1186/s12890-015-0031-1.
- 430 4. Langer D, Hendriks E, Burtin C, et al. A clinical practice guideline for physiotherapists  
431 treating patients with chronic obstructive pulmonary disease based on a systematic  
432 review of available evidence. *Clin Rehabil.* 2009;23(5):445-462.  
433 doi:10.1177/0269215509103507.
- 434 5. Vanhees L, Rauch B, Piepoli M, et al. Importance of characteristics and modalities of  
435 physical activity and exercise in the management of cardiovascular health in  
436 individuals with cardiovascular disease (Part III). *Eur J Prev Cardiol.*  
437 2012;19(6):1333-1356. doi:10.1177/2047487312437063.
- 438 6. Morris NR, Kermeen FD, Holland AE. Exercise-based rehabilitation programmes for  
439 pulmonary hypertension. *Cochrane Database Syst Rev.* 2017;1(1):CD011285..  
440 doi:10.1002/14651858.CD011285.pub2.
- 441 7. Dalla Vecchia LA, Bussotti M. Exercise training in pulmonary arterial hypertension. *J*  
442 *Thorac Dis.* 2018;10(1):508-521. doi:10.21037/jtd.2018.01.90.
- 443 8. Babu AS, Padmakumar R, Maiya AG, Mohapatra AK, et al . Effects of Exercise  
444 Training on Exercise Capacity in Pulmonary Arterial Hypertension: A Systematic



## PHAHB Intervention Protocol

- 1  
2  
3 445 Review of Clinical Trials. *Heart Lung Circ.* 2016;25(4):333-341.  
4  
5 446 doi:10.1016/j.hlc.2015.10.01.  
6  
7  
8 447 9. Yuan P, Yuan XT, Sun XY, et al. Exercise training for pulmonary hypertension: a  
9  
10 448 systematic review and meta-analysis. *Int J Cardiol.* 2015;178:142-146.  
11  
12 449 doi:10.1016/j.ijcard.2014.10.161.  
13  
14 450 10. Pandey A, Garg S, Khunger M, et al. Efficacy and Safety of Exercise Training in  
15  
16 451 Chronic Pulmonary Hypertension: Systematic Review and Meta-Analysis. *Circ Heart*  
17  
18 452 *Fail.* 2015;8(6):1032-1043. doi:10.1161/CIRCHEARTFAILURE.115.00.  
19  
20 453 11. Benjamin N, Marra AM, Eichstaedt C, Grünig E. Exercise Training and Rehabilitation  
21  
22 454 in Pulmonary Hypertension. *Heart Fail Clin.* 2018;14(3):425-430.  
23  
24 455 doi:10.1016/j.hfc.2018.03.008.  
25  
26 456 12. Galiè N, Humbert M, Vachiery JL, et al. 2015 ESC/ERS Guidelines for the diagnosis  
27  
28 457 and treatment of pulmonary hypertension: The Joint Task Force for the Diagnosis and  
29  
30 458 Treatment of Pulmonary Hypertension of the European Society of Cardiology (ESC)  
31  
32 459 and the European Respiratory Society (ERS). *Eur Respir J.* 2015;46(4):903-975.  
33  
34 460 doi:10.1183/13993003.01032-2015.  
35  
36 461 13. Galiè N, Corris PA, Frost A, et al. Updated treatment algorithm of pulmonary arterial  
37  
38 462 hypertension. *J Am Coll Cardiol.* 2013;62(25 Suppl):D60-D72.  
39  
40 463 doi:10.1016/j.jacc.2013.10.031.  
41  
42 464 14. Mereles D, Ehlken N, Kreuzer S, et al. Exercise and respiratory training improve  
43  
44 465 exercise capacity and quality of life in patients with severe chronic pulmonary  
45  
46 466 hypertension. *Circulation.* 2006;114(14):1482-1489.  
47  
48 467 doi:10.1161/CIRCULATIONAHA.106.618397.  
49  
50 468 15. Babu AS, Padmakumar R, Maiya AG, et al. Letter by Babu et al Regarding Article,  
51  
52 469 "Advances in Therapeutic Interventions for Patients With Pulmonary Arterial  
53  
54  
55  
56  
57  
58  
59  
60

## PHAHB Intervention Protocol

- 1  
2  
3 470 Hypertension". *Circulation*. 2015;132(12):e153. doi:  
4  
5 471 10.1161/CIRCULATIONAHA.114.014978.  
6  
7  
8 472 16. Buckingham SA, Taylor RS, Jolly K, et al. Home-based versus centre-based cardiac  
9  
10 473 rehabilitation: abridged Cochrane systematic review and meta-analysis. *Open Heart*.  
11  
12 474 2016;3(2):e000463. doi:10.1136/openhrt-2016-000463.  
13  
14  
15 475 17. Hardcastle SJ, & Cohen PA. Effective physical activity promotion to survivors of  
16  
17 476 cancer is likely to be home based and to require oncologist participation. *J Clin Oncol*  
18  
19 477 2017;35:3635-3637. doi: 10.1200/JCO.2017.74.6032.  
20  
21  
22 478 18. Maxwell-Smith C, Zeps N, Hagger MS, et al. Barriers to physical activity participation  
23  
24 479 in colorectal cancer survivors at high risk of cardiovascular disease. *Psycho-oncology*  
25  
26 480 2017;26:808-814. doi:10.1002/pon.4234.  
27  
28  
29 481 19. Artinian NT, Fletcher GF, Mozaffarian D, et al. Interventions to promote physical  
30  
31 482 activity and dietary lifestyle changes for cardiovascular risk factor reduction in adults:  
32  
33 483 a scientific statement from the American Heart Association. *Circulation*.  
34  
35 484 2010;122(4):406-441. doi:10.1161/CIR.0b013e3181e8edf1.  
36  
37  
38 485 20. Karapolat H, Çınar ME, Tanıgör G, et al. Effects of cardiopulmonary rehabilitation on  
39  
40 486 pulmonary arterial hypertension: A prospective, randomized study. *Turk J Phys Med*  
41  
42 487 *Rehabil*. 2019;65(3):278-286. doi: 10.5606/tftrd.2019.2758.  
43  
44  
45 488 21. Babu AS, Padmakumar R, Nayak K, et al. Effects of home-based exercise training on  
46  
47 489 functional outcomes and quality of life in patients with pulmonary hypertension: A  
48  
49 490 randomized clinical trial. *Indian Heart J*. 2019;71(2):161-165.  
50  
51 491 doi:10.1016/j.ihj.2019.03.002  
52  
53  
54 492 22. Michie S, van Stralen MM, West R. The behaviour change wheel: a new method for  
55  
56 493 characterising and designing behaviour change interventions. *Implement Sci*.  
57  
58 494 2011;6:42. Published 2011 Apr 23. doi:10.1186/1748-5908-6-42.  
59  
60

## PHAHB Intervention Protocol

- 1  
2  
3 495 23. Samdal GB, Eide GE, Barth T, Williams G, Meland E. Effective behaviour change  
4  
5 496 techniques for physical activity and healthy eating in overweight and obese adults;  
6  
7 497 systematic review and meta-regression analyses. *Int J Behav Nutr Phys Act.*  
8  
9 498 2017;14(1):42. Published 2017 Mar 28. doi:10.1186/s12966-017-0494-y.  
10  
11  
12 499 24. Artinian NT, Fletcher GF, Mozaffarian D, et al. Interventions to promote physical  
13  
14 500 activity and dietary lifestyle changes for cardiovascular risk factor reduction in adults:  
15  
16 501 a scientific statement from the American Heart Association. *Circulation.*  
17  
18 502 2010;122(4):406-441. doi:10.1161/CIR.0b013e3181e8edf1.  
19  
20  
21 503 25. Lahart I, Metsios G, Nevill AM, et al. Randomised controlled trial of a home-based  
22  
23 504 physical activity intervention in breast cancer survivors. *BMC Cancer* 2016; 16:234-  
24  
25 505 247. doi: 10.1186/s12885-016-2258-5.  
26  
27  
28 506 26. Hardcastle SJ, Hince D, Jiménez-Castuera R, et al., Promoting physical activity in  
29  
30 507 regional and remote cancer survivors (PPARCS) using wearables and health coaching:  
31  
32 508 randomised controlled trial protocol  
33  
34 509 *BMJOpen* 2019;9:e028369. doi: 10.1136/bmjopen-2018-028369.  
35  
36  
37 510 27. Mercer K, Giangregorio L, Schneider E, et al. Acceptance of commercially available  
38  
39 511 wearable activity trackers among adults aged over 50 and with chronic illness: a  
40  
41 512 mixed-methods evaluation. *JMIR Mhealth Uhealth* 2016;4: e7.  
42  
43 513 doi:10.2196/mhealth.4225.  
44  
45  
46 514 28. Chan A, Tetzlaff JM, Altman DG, et al. SPIRIT 2013 statement: Defining standard  
47  
48 515 protocol items for clinical trials. *Annals of Internal Medicine* 2013;158:200-207.  
49  
50  
51 516 29. Browne RH. On the use of a pilot sample for sample size determination. *Stat Med.*  
52  
53 517 1995;14(17):1933-1940. doi:10.1002/sim.4780141709.  
54  
55  
56 518 30. Julious SA: Sample size of 12 per group rule of thumb for a pilot study. *Pharm Stat.*  
57  
58 519 2005, 4 (4): 287-291. 10.1002/pst.185.  
59  
60

## PHAHB Intervention Protocol

- 1  
2  
3 520 31. Sim J, Lewis M. The size of a pilot study for a clinical trial should be calculated in  
4  
5 521 relation to considerations of precision and efficiency. *J Clin Epidemiol.*  
6  
7 522 2012;65(3):301-308. doi:10.1016/j.jclinepi.2011.07.011.  
8  
9  
10 523 32. Holland AE, Spruit MA, Troosters T, et al. An official European Respiratory  
11  
12 524 Society/American Thoracic Society technical standard: field walking tests in chronic  
13  
14 525 respiratory disease. *Eur Respir J.* 2014;44(6):1428-1446.  
15  
16 526 doi:10.1183/09031936.00150314.  
17  
18  
19 527 33. Harrington DM, Welk GJ, Donnelly AE. Validation of MET estimates and step  
20  
21 528 measurement using the ActivPAL physical activity logger. *J Sports Sci.*  
22  
23 529 2011;29(6):627-633. doi:10.1080/02640414.2010.549499.  
24  
25  
26 530 34. Kozey-Keadle S, Libertine A, Lyden K, et al. Validation of wearable monitors for  
27  
28 531 assessing sedentary behavior. *Med Sci Sports Exerc.* 2011;43(8):1561-1567.  
29  
30 532 doi:10.1249/MSS.0b013e31820ce174.  
31  
32  
33 533 35. Ware JE, Sherbourne CD. The MOS 36-Item Short-Form Health Survey (SF-36). I.  
34  
35 534 Conceptual framework and item selection. *Med Care* 1992;30:473-83.  
36  
37  
38 535 36. McKenna SP, Doughty N, Meads DM, Doward LC, Pepke-Zaba J. The Cambridge  
39  
40 536 Pulmonary Hypertension Outcome Review (CAMPHOR): a measure of health-related  
41  
42 537 quality of life and quality of life for patients with pulmonary hypertension. *Qual Life*  
43  
44 538 *Res.* 2006;15(1):103-115. doi:10.1007/s11136-005-3513-4.  
45  
46  
47 539 37. Krupp LB, LaRocca NG, Muir-Nash J, Steinberg AD. The Fatigue Severity  
48  
49 540 Scale: Application to Patients With Multiple Sclerosis and Systemic Lupus  
50  
51 541 Erythematosus. *Arch Neurol.* 1989;46(10):1121-1123.  
52  
53 542 doi:10.1001/archneur.1989.00520460115022.  
54  
55  
56  
57  
58  
59  
60

## PHAHB Intervention Protocol

- 1  
2  
3 543 38. Schentag CT, Cichon J, MacKinnon A, Gladman DD, Urowitz MB. Validation and  
4  
5 544 normative data for the 0–10 point scale version of the fatigue severity scale  
6  
7 545 (FSS) [abstract]. *Arthritis Rheum* 2000; **43** Suppl: S177.  
8  
9  
10 546 39. Luszczynska, A., & Sutton, S. (2006). Physical activity after cardiac rehabilitation:  
11  
12 547 Evidence that different types of self-efficacy are important in maintainers and  
13  
14 548 relapsers. *Rehabilitation Psychology*, *51*(4), 314–321. doi. 10.1037/0090-  
15  
16 549 5550.51.4.314.  
17  
18  
19 550 40. Shields CA, Brawley LR. Preferring proxy-agency: impact on self-efficacy for  
20  
21 551 exercise. *J Health Psychol.* 2006 Nov;11(6):904-14. doi: 10.1177/1359105306069092.  
22  
23 552 PMID: 17035262.  
24  
25  
26 553 41. Ajzen I, Brown TC, & Carvajal F. Explaining the discrepancy between intentions and  
27  
28 554 actions: The case of hypothetical bias in contingent valuation. *Pers Soc Psychol Bull*  
29  
30 555 2004;30:1108-1121. doi:10.1177/0146167204264079.  
31  
32  
33 556 42. Plotnikoff RC, Blanchard CM, Hotz SB, et al. Validation of the decisional balance  
34  
35 557 scales in the exercise domain from the transtheoretical model: A longitudinal test.  
36  
37 558 *Meas Phys Educ Exerc Sci* 2001;5:191-206. doi:10.1207/S15327841MPEE0504\_01.  
38  
39  
40 559 43. Yorke J, Deaton C, Campbell M, et al. Symptom severity and its effect on health-  
41  
42 560 related quality of life over time in patients with pulmonary hypertension: a multisite  
43  
44 561 longitudinal cohort study. *BMJ Open Respiratory*  
45  
46 562 *Research.* 2018;**5**:e000263. doi: 10.1136/bmjresp-2017-000263.  
47  
48  
49 563 44. Sallis JF, Grossman RM, Pinski RB, Patterson TL, Nader PR. The development of  
50  
51 564 scales to measure social support for diet and exercise behaviors. *Prev Med.*  
52  
53 565 1987;16(6):825-836. doi:10.1016/0091-7435(87)90022-3.  
54  
55  
56 566 45. Maxwell-Smith C, Cohen PA, Platell C, et al. Wearable Activity Technology And  
57  
58 567 Action-Planning (WATAAP) to promote physical activity in cancer survivors:  
59  
60

## PHAHB Intervention Protocol

- 1  
2  
3 568 Randomised controlled trial protocol. *Int J Clin Health Psychol.* 2018;18(2):124-132.  
4  
5 569 doi:10.1016/j.ijchp.2018.03.003.  
6  
7  
8 570 46. Foster C, Florhaug JA, Franklin J, et al. A new approach to monitoring exercise  
9  
10 571 training. *J Strength Cond Res.* 2001;15(1):109-115.  
11  
12 572 47. Rosales W, Cofré C, Alejandra C, et al. Validación de la escala de Borg en personas  
13  
14 573 con diabetes mellitus tipo 2 [Validation of the Borg scale in participants with type 2  
15  
16 574 diabetes mellitus]. *Rev Med Chil.* 2016;144(9):1159-1163. doi:10.4067/S0034-  
17  
18 575 98872016000900009.  
19  
20  
21 576 48. Spruit MA, Singh SJ, Garvey C, et al. An official American Thoracic  
22  
23 577 Society/European Respiratory Society statement: key concepts and advances in  
24  
25 578 pulmonary rehabilitation. *Am J Respir Crit Care Med.* 2013;188(8):e13-e64.  
26  
27 579 doi:10.1164/rccm.201309-1634ST.  
28  
29  
30 580 49. Braun V, & Clarke V. Using thematic analysis in psychology. *Qualitative Research in*  
31  
32 581 *Psychology* 2006;3:2, 77-101. doi: 10.1191/1478088706qp063oa.  
33  
34  
35 582 50. Haapalainen E, Laurinen P, Siirtola P, et al. Exercise energy expenditure estimation  
36  
37 583 based on acceleration data using the linear mixed model. *IEEE International*  
38  
39 584 *Conference on Information Reuse and Integration.* 2008: 131–136  
40  
41  
42  
43 585 51. Armstrong R. A. Recommendations for analysis of repeated-measures designs: Testing  
44  
45 586 and correcting for sphericity and use of manova and mixed model analysis. *Ophthalmic*  
46  
47 587 *and Physiological Optics.* 2017: 37(5), 585–593.  
48  
49  
50 588 52. Dalla Vecchia LA, Bussotti M. Exercise training in pulmonary arterial hypertension. *J*  
51  
52 589 *Thorac Dis.* 2018;10(1):508-521. doi:10.21037/jtd.2018.01.90.  
53  
54  
55 590 53. Ozemek C, Berry MJ, Arena R. A Review of Exercise Interventions in Pulmonary  
56  
57 591 Arterial Hypertension and Recommendations for Rehabilitation Programming. *J*  
58  
59  
60

## PHAHB Intervention Protocol

592 *Cardiopulm Rehabil Prev.* 2019;39(3):138-145.

593 doi:10.1097/HCR.0000000000000402

594 54. Eccles MP, Armstrong D, Baker R, et al. An implementation research  
595 agenda. *Implement Sci.* 2009;4:18. Published 2009 Apr 7. doi:10.1186/1748-5908-4-  
596 18.

597

598 **Contributors:** CMC, BK, SJH, NMC, SG, BMC, and NM were involved in study  
599 conceptualisation, development of intervention content and writing of the protocol. AMC  
600 provided guidance on the statistical analysis. CMC led the writing of the manuscript and all  
601 authors edited and reviewed the manuscript.

602 **Funding:** This work was supported by Janssen Sciences Ireland UC. The funding body had no  
603 role in the study design and data collection, analysis and interpretation of data.

604 **Competing interest statement:** None declared.

605

606

607

608

609

610

## PHAHB Intervention Protocol

611

612 Table 1: Study outcome measures and time points

| Assessments                                   | Time             |                               |                   |
|-----------------------------------------------|------------------|-------------------------------|-------------------|
|                                               | Baseline<br>(T1) | Post-<br>Intervention<br>(T2) | Follow-up<br>(T3) |
| Written informed consent & eligibility        | X                |                               |                   |
| Demographics                                  | X                |                               |                   |
| Medical history                               | X                |                               |                   |
| WHO functional class                          | X                | X                             | X                 |
| Concomitant medication                        | X                | X                             | X                 |
| Adverse events                                | X                | X                             | X                 |
| Exercise capacity (6-MWT), Borg Dyspnea Index | X                | X                             | X                 |
| Muscle strength (Sit to Stand)                | X                | X                             | X                 |
| Physical activity (ActivPAL Micro)            | X                | X                             | X                 |
| Quality of life (CAMPHOR & SF-36)             | X                | X                             | X                 |



PHAHB Intervention Protocol

|                                                                 |   |   |   |
|-----------------------------------------------------------------|---|---|---|
| Psychological constructs                                        | X | X | X |
| Intervention debrief questionnaires/ semi-structured interviews |   | X | X |

613

614

For peer review only

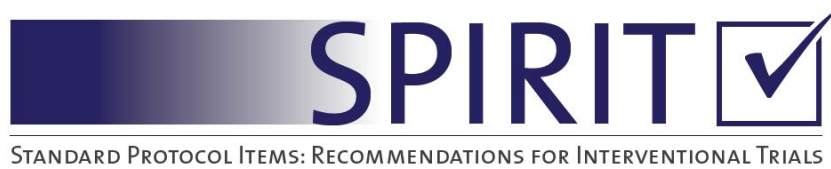

STANDARD PROTOCOL ITEMS: RECOMMENDATIONS FOR INTERVENTIONAL TRIALS

SPIRIT 2013 Checklist: Recommended items to address in a clinical trial protocol and related documents\*

| Section/item                      | Item No | Description                                                                                                                                                                                                                                                                                               |
|-----------------------------------|---------|-----------------------------------------------------------------------------------------------------------------------------------------------------------------------------------------------------------------------------------------------------------------------------------------------------------|
| <b>Administrative information</b> |         |                                                                                                                                                                                                                                                                                                           |
| Title                             | 1       | Descriptive title identifying the study design, population, interventions, and, if applicable, trial acronym <b>(Page 1)</b>                                                                                                                                                                              |
| Trial registration                | 2a      | Trial identifier and registry name. If not yet registered, name of intended registry <b>(Page 3)</b>                                                                                                                                                                                                      |
|                                   | 2b      | All items from the World Health Organization Trial Registration Data Set <b>(Page 3)</b>                                                                                                                                                                                                                  |
| Protocol version                  | 3       | Date and version identifier <b>(Page 3)</b>                                                                                                                                                                                                                                                               |
| Funding                           | 4       | Sources and types of financial, material, and other support <b>(Page 29)</b>                                                                                                                                                                                                                              |
| Roles and responsibilities        | 5a      | Names, affiliations, and roles of protocol contributors <b>(Title page and Page 29)</b>                                                                                                                                                                                                                   |
|                                   | 5b      | Name and contact information for the trial sponsor <b>(Page 29)</b>                                                                                                                                                                                                                                       |
|                                   | 5c      | Role of study sponsor and funders, if any, in study design; collection, management, analysis, and interpretation of data; writing of the report; and the decision to submit the report for publication, including whether they will have ultimate authority over any of these activities <b>(Page 29)</b> |
|                                   | 5d      | Composition, roles, and responsibilities of the coordinating centre, steering committee, endpoint adjudication committee, data management team, and other individuals or groups overseeing the trial, if applicable (see Item 21a for data monitoring committee) <b>(Page 29)</b>                         |
| <b>Introduction</b>               |         |                                                                                                                                                                                                                                                                                                           |
| Background and rationale          | 6a      | Description of research question and justification for undertaking the trial, including summary of relevant studies (published and unpublished) examining benefits and harms for each intervention <b>(Pages 5-7)</b>                                                                                     |
|                                   | 6b      | Explanation for choice of comparators <b>(Page 9)</b>                                                                                                                                                                                                                                                     |
| Objectives                        | 7       | Specific objectives or hypotheses <b>(Page 7)</b>                                                                                                                                                                                                                                                         |

1  
2  
3  
4  
5  
6  
7  
8  
9  
10  
11  
12  
13  
14  
15  
16  
17  
18  
19  
20  
21  
22  
23  
24  
25  
26  
27  
28  
29  
30  
31  
32  
33  
34  
35  
36  
37  
38  
39  
40  
41  
42  
43  
44  
45  
46  
47  
48  
49  
50  
51  
52  
53  
54  
55  
56  
57  
58  
59  
60

|              |   |                                                                                                                                                                                                                           |
|--------------|---|---------------------------------------------------------------------------------------------------------------------------------------------------------------------------------------------------------------------------|
| Trial design | 8 | Description of trial design including type of trial (eg, parallel group, crossover, factorial, single group), allocation ratio, and framework (eg, superiority, equivalence, noninferiority, exploratory) <b>(Page 7)</b> |
|--------------|---|---------------------------------------------------------------------------------------------------------------------------------------------------------------------------------------------------------------------------|

### **Methods: Participants, interventions, and outcomes**

|               |   |                                                                                                                                                                                                      |
|---------------|---|------------------------------------------------------------------------------------------------------------------------------------------------------------------------------------------------------|
| Study setting | 9 | Description of study settings (eg, community clinic, academic hospital) ( and list of countries where data will be collected. Reference to where list of study sites can be obtained <b>(Page 8)</b> |
|---------------|---|------------------------------------------------------------------------------------------------------------------------------------------------------------------------------------------------------|

|                      |    |                                                                                                                                                                                                         |
|----------------------|----|---------------------------------------------------------------------------------------------------------------------------------------------------------------------------------------------------------|
| Eligibility criteria | 10 | Inclusion and exclusion criteria for participants. If applicable, eligibility criteria for study centres and individuals who will perform the interventions (eg, surgeons, psychotherapists) <b>(7)</b> |
|----------------------|----|---------------------------------------------------------------------------------------------------------------------------------------------------------------------------------------------------------|

|               |     |                                                                                                                                                |
|---------------|-----|------------------------------------------------------------------------------------------------------------------------------------------------|
| Interventions | 11a | Interventions for each group with sufficient detail to allow replication, including how and when they will be administered <b>(Page 13-17)</b> |
|---------------|-----|------------------------------------------------------------------------------------------------------------------------------------------------|

|  |     |                                                                                                                                                                                                             |
|--|-----|-------------------------------------------------------------------------------------------------------------------------------------------------------------------------------------------------------------|
|  | 11b | Criteria for discontinuing or modifying allocated interventions for a given trial participant (eg, drug dose change in response to harms, participant request, or improving/worsening disease) <b>(N/A)</b> |
|--|-----|-------------------------------------------------------------------------------------------------------------------------------------------------------------------------------------------------------------|

|  |     |                                                                                                                                                                       |
|--|-----|-----------------------------------------------------------------------------------------------------------------------------------------------------------------------|
|  | 11c | Strategies to improve adherence to intervention protocols, and any procedures for monitoring adherence (eg, drug tablet return, laboratory tests) <b>(Page 13-17)</b> |
|--|-----|-----------------------------------------------------------------------------------------------------------------------------------------------------------------------|

|  |     |                                                                                                               |
|--|-----|---------------------------------------------------------------------------------------------------------------|
|  | 11d | Relevant concomitant care and interventions that are permitted or prohibited during the trial <b>(Page 8)</b> |
|--|-----|---------------------------------------------------------------------------------------------------------------|

|          |    |                                                                                                                                                                                                                                                                                                                                                                                                           |
|----------|----|-----------------------------------------------------------------------------------------------------------------------------------------------------------------------------------------------------------------------------------------------------------------------------------------------------------------------------------------------------------------------------------------------------------|
| Outcomes | 12 | Primary, secondary, and other outcomes, including the specific measurement variable (eg, systolic blood pressure), analysis metric (eg, change from baseline, final value, time to event), method of aggregation (eg, median, proportion), and time point for each outcome. Explanation of the clinical relevance of chosen efficacy and harm outcomes is strongly recommended <b>(Page 7 &amp; 9-13)</b> |
|----------|----|-----------------------------------------------------------------------------------------------------------------------------------------------------------------------------------------------------------------------------------------------------------------------------------------------------------------------------------------------------------------------------------------------------------|

|                      |    |                                                                                                                                                                                                   |
|----------------------|----|---------------------------------------------------------------------------------------------------------------------------------------------------------------------------------------------------|
| Participant timeline | 13 | Time schedule of enrolment, interventions (including any run-ins and washouts), assessments, and visits for participants. A schematic diagram is highly recommended (see Figure) <b>(table 1)</b> |
|----------------------|----|---------------------------------------------------------------------------------------------------------------------------------------------------------------------------------------------------|

|             |    |                                                                                                                                                                                                       |
|-------------|----|-------------------------------------------------------------------------------------------------------------------------------------------------------------------------------------------------------|
| Sample size | 14 | Estimated number of participants needed to achieve study objectives and how it was determined, including clinical and statistical assumptions supporting any sample size calculations <b>(Page 9)</b> |
|-------------|----|-------------------------------------------------------------------------------------------------------------------------------------------------------------------------------------------------------|

|             |    |                                                                                                     |
|-------------|----|-----------------------------------------------------------------------------------------------------|
| Recruitment | 15 | Strategies for achieving adequate participant enrolment to reach target sample size <b>(Page 8)</b> |
|-------------|----|-----------------------------------------------------------------------------------------------------|

### **Methods: Assignment of interventions (for controlled trials)**

Allocation:

|    |                |     |                                                                         |
|----|----------------|-----|-------------------------------------------------------------------------|
| 1  |                |     |                                                                         |
| 2  | Sequence       | 16a | Method of generating the allocation sequence (eg, computer-             |
| 3  | generation     |     | generated random numbers), and list of any factors for stratification.  |
| 4  |                |     | (To reduce predictability of a random sequence, details of any          |
| 5  |                |     | planned restriction (eg, blocking) should be provided in a separate     |
| 6  |                |     | document that is unavailable to those who enrol participants or assign  |
| 7  |                |     | interventions <b>(N/A)</b>                                              |
| 8  |                |     |                                                                         |
| 9  |                |     |                                                                         |
| 10 | Allocation     | 16b | Mechanism of implementing the allocation sequence (eg, central          |
| 11 | concealment    |     | telephone; sequentially numbered, opaque, sealed envelopes),            |
| 12 | mechanism      |     | describing any steps to conceal the sequence until interventions are    |
| 13 |                |     | <b>(N/A)</b>                                                            |
| 14 |                |     |                                                                         |
| 15 | Implementation | 16c | Who will generate the allocation sequence, who will enrol participants, |
| 16 |                |     | and who will assign participants to interventions <b>(N/A)</b>          |
| 17 |                |     |                                                                         |
| 18 |                |     |                                                                         |
| 19 | Blinding       | 17a | Who will be blinded after assignment to interventions (eg, trial        |
| 20 | (masking)      |     | participants, care providers, outcome assessors, data analysts), and    |
| 21 |                |     | how <b>(N/A)</b>                                                        |
| 22 |                |     |                                                                         |
| 23 |                | 17b | If blinded, circumstances under which unblinding is permissible, and    |
| 24 |                |     | procedure for revealing a participant's allocated intervention during   |
| 25 |                |     | the trial <b>(N/A)</b>                                                  |
| 26 |                |     |                                                                         |
| 27 |                |     |                                                                         |

### Methods: Data collection, management, and analysis

|    |                 |     |                                                                          |
|----|-----------------|-----|--------------------------------------------------------------------------|
| 28 |                 |     |                                                                          |
| 29 |                 |     |                                                                          |
| 30 | Data collection | 18a | Plans for assessment and collection of outcome, baseline, and other      |
| 31 | methods         |     | trial data, including any related processes to promote data quality (eg, |
| 32 |                 |     | duplicate measurements, training of assessors) and a description of      |
| 33 |                 |     | study instruments (eg, questionnaires, laboratory tests) along with      |
| 34 |                 |     | their reliability and validity, if known. Reference to where data        |
| 35 |                 |     | collection forms can be found, if not in the protocol <b>(Page9-13)</b>  |
| 36 |                 |     |                                                                          |
| 37 |                 |     |                                                                          |
| 38 |                 | 18b | Plans to promote participant retention and complete follow-up,           |
| 39 |                 |     | including list of any outcome data to be collected for participants who  |
| 40 |                 |     | discontinue or deviate from intervention protocols <b>(Page 13)</b>      |
| 41 |                 |     |                                                                          |
| 42 | Data            | 19  | Plans for data entry, coding, security, and storage, including any       |
| 43 | management      |     | related processes to promote data quality (eg, double data entry;        |
| 44 |                 |     | range checks for data values). Reference to where details of data        |
| 45 |                 |     | management procedures can be found, if not in the protocol <b>(Page</b>  |
| 46 |                 |     | <b>18)</b>                                                               |
| 47 |                 |     |                                                                          |
| 48 |                 |     |                                                                          |
| 49 | Statistical     | 20a | Statistical methods for analysing primary and secondary outcomes.        |
| 50 | methods         |     | Reference to where other details of the statistical analysis plan can be |
| 51 |                 |     | found, if not in the protocol <b>(Page 18)</b>                           |
| 52 |                 |     |                                                                          |
| 53 |                 |     |                                                                          |
| 54 |                 | 20b | Methods for any additional analyses (eg, subgroup and adjusted           |
| 55 |                 |     | analyses) <b>(Page 18)</b>                                               |
| 56 |                 |     |                                                                          |
| 57 |                 | 20c | Definition of analysis population relating to protocol non-adherence     |
| 58 |                 |     | (eg, as randomised analysis), and any statistical methods to handle      |
| 59 |                 |     | missing data (eg, multiple imputation) <b>(Page 18)</b>                  |
| 60 |                 |     |                                                                          |

## Methods: Monitoring

|                 |     |                                                                                                                                                                                                                                                                                                                                                        |
|-----------------|-----|--------------------------------------------------------------------------------------------------------------------------------------------------------------------------------------------------------------------------------------------------------------------------------------------------------------------------------------------------------|
| Data monitoring | 21a | Composition of data monitoring committee (DMC); summary of its role and reporting structure; statement of whether it is independent from the sponsor and competing interests; and reference to where further details about its charter can be found, if not in the protocol. Alternatively, an explanation of why a DMC is not needed <b>(Page 18)</b> |
|                 | 21b | Description of any interim analyses and stopping guidelines, including who will have access to these interim results and make the final decision to terminate the trial <b>(N/A)</b>                                                                                                                                                                   |
| Harms           | 22  | Plans for collecting, assessing, reporting, and managing solicited and spontaneously reported adverse events and other unintended effects of trial interventions or trial conduct <b>(Page 10)</b>                                                                                                                                                     |
| Auditing        | 23  | Frequency and procedures for auditing trial conduct, if any, and whether the process will be independent from investigators and the sponsor <b>(Page 18)</b>                                                                                                                                                                                           |

## Ethics and dissemination

|                               |     |                                                                                                                                                                                                                                                   |
|-------------------------------|-----|---------------------------------------------------------------------------------------------------------------------------------------------------------------------------------------------------------------------------------------------------|
| Research ethics approval      | 24  | Plans for seeking research ethics committee/institutional review board (REC/IRB) approval <b>(Page 3)</b>                                                                                                                                         |
| Protocol amendments           | 25  | Plans for communicating important protocol modifications (eg, changes to eligibility criteria, outcomes, analyses) to relevant parties (eg, investigators, REC/IRBs, trial participants, trial registries, journals, regulators) <b>(Page 18)</b> |
| Consent or assent             | 26a | Who will obtain informed consent or assent from potential trial participants or authorised surrogates, and how (see Item 32) <b>(Page 8)</b>                                                                                                      |
|                               | 26b | Additional consent provisions for collection and use of participant data and biological specimens in ancillary studies, if applicable <b>(N/A)</b>                                                                                                |
| Confidentiality               | 27  | How personal information about potential and enrolled participants will be collected, shared, and maintained in order to protect confidentiality before, during, and after the trial <b>(Page 18)</b>                                             |
| Declaration of interests      | 28  | Financial and other competing interests for principal investigators for the overall trial and each study site <b>(Page 29)</b>                                                                                                                    |
| Access to data                | 29  | Statement of who will have access to the final trial dataset, and disclosure of contractual agreements that limit such access for investigators <b>(Page 18)</b>                                                                                  |
| Ancillary and post-trial care | 30  | Provisions, if any, for ancillary and post-trial care, and for compensation to those who suffer harm from trial participation <b>(N/A)</b>                                                                                                        |

- 1  
2  
3  
4  
5  
6  
7  
8  
9  
10  
11  
12  
13  
14
- |                         |     |                                                                                                                                                                                                                                                                                                     |
|-------------------------|-----|-----------------------------------------------------------------------------------------------------------------------------------------------------------------------------------------------------------------------------------------------------------------------------------------------------|
| Dissemination<br>policy | 31a | Plans for investigators and sponsor to communicate trial results to participants, healthcare professionals, the public, and other relevant groups (eg, via publication, reporting in results databases, or other data sharing arrangements), including any publication restrictions <b>(Page 3)</b> |
|                         | 31b | Authorship eligibility guidelines and any intended use of professional writers <b>(Page 29)</b>                                                                                                                                                                                                     |
|                         | 31c | Plans, if any, for granting public access to the full protocol, participant-level dataset, and statistical code <b>(Page 3)</b>                                                                                                                                                                     |

## 15 Appendices

- 16  
17  
18  
19  
20  
21  
22  
23  
24
- |                               |    |                                                                                                                                                                                                             |
|-------------------------------|----|-------------------------------------------------------------------------------------------------------------------------------------------------------------------------------------------------------------|
| Informed consent<br>materials | 32 | Model consent form and other related documentation given to participants and authorised surrogates <b>(Appendix A)</b>                                                                                      |
| Biological<br>specimens       | 33 | Plans for collection, laboratory evaluation, and storage of biological specimens for genetic or molecular analysis in the current trial and for future use in ancillary studies, if applicable <b>(N/A)</b> |

---

25 \*It is strongly recommended that this checklist be read in conjunction with the SPIRIT 2013  
26 Explanation & Elaboration for important clarification on the items. Amendments to the  
27 protocol should be tracked and dated. The SPIRIT checklist is copyrighted by the SPIRIT  
28 Group under the Creative Commons "[Attribution-NonCommercial-NoDerivs 3.0 Unported](https://creativecommons.org/licenses/by-nc-nd/3.0/)"  
29 license.  
30  
31  
32  
33  
34  
35  
36  
37  
38  
39  
40  
41  
42  
43  
44  
45  
46  
47  
48  
49  
50  
51  
52  
53  
54  
55  
56  
57  
58  
59  
60

# BMJ Open

## The Pulmonary Hypertension And Home-Based (PHAHB) Exercise Intervention: Protocol for a Feasibility Study

|                                 |                                                                                                                                                                                                                                                                                                                                                                                                                                                                                                                                                                                                                                                                                                                                               |
|---------------------------------|-----------------------------------------------------------------------------------------------------------------------------------------------------------------------------------------------------------------------------------------------------------------------------------------------------------------------------------------------------------------------------------------------------------------------------------------------------------------------------------------------------------------------------------------------------------------------------------------------------------------------------------------------------------------------------------------------------------------------------------------------|
| Journal:                        | <i>BMJ Open</i>                                                                                                                                                                                                                                                                                                                                                                                                                                                                                                                                                                                                                                                                                                                               |
| Manuscript ID                   | bmjopen-2020-045460.R2                                                                                                                                                                                                                                                                                                                                                                                                                                                                                                                                                                                                                                                                                                                        |
| Article Type:                   | Protocol                                                                                                                                                                                                                                                                                                                                                                                                                                                                                                                                                                                                                                                                                                                                      |
| Date Submitted by the Author:   | 30-Mar-2021                                                                                                                                                                                                                                                                                                                                                                                                                                                                                                                                                                                                                                                                                                                                   |
| Complete List of Authors:       | McCormack, Ciara; Dublin City University, School of Health and Human Performance<br>Kehoe, Brona; Waterford Institute of Technology, Department of Sport & Exercise Science<br>Hardcastle, Sarah; Dublin City University, School of Health and Human Performance; University of Notre Dame, Fremantle, Western Australia, Institute for Health Research<br>McCaffrey, Noel; ExWell Medical<br>McCarren, Andrew; Insight Centre for Data Analytics, Dublin City University, Dublin, Ireland<br>Gaine, Sean; Mater Misericordiae University Hospital, Respiratory Department<br>McCullagh, Brian; Mater Misericordiae University Hospital, Respiratory Department<br>Moyna, Niall; Dublin City University, School of Health & Human performance |
| <b>Primary Subject Heading</b>: | Rehabilitation medicine                                                                                                                                                                                                                                                                                                                                                                                                                                                                                                                                                                                                                                                                                                                       |
| Secondary Subject Heading:      | Respiratory medicine, Sports and exercise medicine, Rehabilitation medicine                                                                                                                                                                                                                                                                                                                                                                                                                                                                                                                                                                                                                                                                   |
| Keywords:                       | REHABILITATION MEDICINE, SPORTS MEDICINE, Respiratory physiology < THORACIC MEDICINE, Rehabilitation medicine < INTERNAL MEDICINE                                                                                                                                                                                                                                                                                                                                                                                                                                                                                                                                                                                                             |
|                                 |                                                                                                                                                                                                                                                                                                                                                                                                                                                                                                                                                                                                                                                                                                                                               |

SCHOLARONE™  
Manuscripts



I, the Submitting Author has the right to grant and does grant on behalf of all authors of the Work (as defined in the below author licence), an exclusive licence and/or a non-exclusive licence for contributions from authors who are: i) UK Crown employees; ii) where BMJ has agreed a CC-BY licence shall apply, and/or iii) in accordance with the terms applicable for US Federal Government officers or employees acting as part of their official duties; on a worldwide, perpetual, irrevocable, royalty-free basis to BMJ Publishing Group Ltd ("BMJ") its licensees and where the relevant Journal is co-owned by BMJ to the co-owners of the Journal, to publish the Work in this journal and any other BMJ products and to exploit all rights, as set out in our [licence](#).

The Submitting Author accepts and understands that any supply made under these terms is made by BMJ to the Submitting Author unless you are acting as an employee on behalf of your employer or a postgraduate student of an affiliated institution which is paying any applicable article publishing charge ("APC") for Open Access articles. Where the Submitting Author wishes to make the Work available on an Open Access basis (and intends to pay the relevant APC), the terms of reuse of such Open Access shall be governed by a Creative Commons licence – details of these licences and which [Creative Commons](#) licence will apply to this Work are set out in our licence referred to above.

Other than as permitted in any relevant BMJ Author's Self Archiving Policies, I confirm this Work has not been accepted for publication elsewhere, is not being considered for publication elsewhere and does not duplicate material already published. I confirm all authors consent to publication of this Work and authorise the granting of this licence.



## PHAHB Intervention Feasibility Study Protocol

1  
2  
3  
4  
5 **1 The Pulmonary Hypertension and Home-Based (PHAHB) Exercise Intervention:**  
6  
7  
8 **2 Protocol for a Feasibility Study**  
9

10  
11 3  
12  
13  
14 4 *Ciara McCormack<sup>a\*</sup>, Brona Kehoe<sup>b</sup>, Sarah J. Hardcastle<sup>a,c</sup>, Noel McCaffrey<sup>d</sup>, Andrew*  
15  
16  
17 5 *McCarren<sup>e</sup>, Sean Gaine<sup>f</sup>, Brian McCullagh<sup>f</sup>, Niall M. Moyna<sup>a</sup>*  
18  
19  
20  
21 6

22  
23  
24 7 <sup>a</sup> School of Health & Human Performance, Dublin City University, Dublin, Ireland.  
25  
26

27  
28 8 <sup>b</sup> Department of Sport & Exercise Science, Waterford Institute of Technology, Waterford City,  
29  
30 9 Ireland.  
31  
32

33  
34 10 <sup>c</sup> Institute for Health Research, University of Notre Dame, Fremantle, Western Australia.  
35  
36

37 11 <sup>d</sup> ExWell Medical, Dublin, Ireland.  
38  
39

40  
41 12 <sup>e</sup> Insight Centre for Data Analytics, Dublin City University, Dublin, Ireland.  
42  
43

44 13 <sup>f</sup> Pulmonary Hypertension Unit, Mater Misericordiae University Hospital Dublin 7, Ireland  
45  
46  
47

48 14  
49  
50  
51 15 \*Ciara McCormack

52  
53  
54 16 Telephone: 01 700 8472  
55  
56

57  
58 17 Email: [Ciara.mccormack26@mail.dcu.ie](mailto:Ciara.mccormack26@mail.dcu.ie)  
59  
60

PHAHB Intervention Feasibility Study Protocol

1  
2  
3  
4  
5  
6  
7  
8  
9  
10  
11  
12  
13  
14  
15  
16  
17  
18  
19  
20  
21  
22  
23  
24  
25  
26  
27  
28  
29  
30  
31  
32  
33  
34  
35  
36  
37  
38  
39  
40  
41  
42  
43  
44  
45  
46  
47  
48  
49  
50  
51  
52  
53  
54  
55  
56  
57  
58  
59  
60

- 18 *School of Health & Human Performance, Dublin City University, Glasnevin Campus,*
- 19 *Glasnevin, Dublin 9, Ireland.*
- 20 *Word Count: 4016*

For peer review only

## PHAHB Intervention Feasibility Study Protocol

21

22 **ABSTRACT**

23 **Introduction:** Novel therapies for pulmonary hypertension (PH) have improved survival and  
24 slowed disease progression. However, patients still present with symptoms of exertional  
25 dyspnoea and fatigue, which impacts their ability to perform activities of daily living, reduces  
26 exercise tolerance and impairs their quality of life (QoL). Exercise training has shown to be  
27 safe and effective at enhancing QoL and physical function in PH patients, yet it remains an  
28 under-utilized adjunct therapy. Most exercise training for PH patients has been offered through  
29 hospital-based programmes. Home-based exercise programmes provide an alternative model  
30 that has the potential to increase the availability and accessibility of exercise training as an  
31 adjunct therapy in PH. The purpose of this study is to investigate the feasibility, acceptability,  
32 utility and safety of a novel remotely supervised home-based PH exercise programme.

33 **Methods:** Single arm intervention with a pre/post comparisons design and a follow up  
34 maintenance phase will be employed. Eligible participants (n= 25) will be recruited from the  
35 Mater Misericordiae University Hospital PH Unit. Participants will undergo a 10-week home-  
36 based exercise programme, with induction training, support materials, telecommunication  
37 support and health coaching sessions followed by a 10-week maintenance phase. The primary  
38 outcomes are feasibility, acceptability, utility and safety of the intervention. Secondary  
39 outcomes will include the impact of the intervention on exercise capacity, physical activity,  
40 strength, health-related quality of life and exercise self-efficacy.

41 **Ethics and dissemination:** Ethics approval has been obtained from the Mater Misericordiae

## PHAHB Intervention Feasibility Study Protocol

1  
2  
3  
4 42 Institutional Review Board REF:1/378/2032 and Dublin City University Research Ethics  
5  
6 43 DCUREC/2018/246. A manuscript of the results will be submitted to a peer-reviewed journal  
7  
8  
9 44 and results will be presented at conferences, community and consumer forums and hospital  
10  
11  
12 45 research conferences. Trial Registration: ISRCTN Registry: ISRCTN83783446. Protocol  
13  
14 46 version. 2.0.

15  
16  
17  
18  
19 47 **Keywords:** Pulmonary Hypertension, exercise rehabilitation, physical activity, exercise  
20  
21  
22 48 training, home-based, remote delivery, wearable technology, health coaching.

23  
24  
25  
26 49 **Strengths and limitations of this study**

- 27  
28  
29  
30 50 • This is the first study to assess the feasibility, utility, safety and acceptability of a novel  
31  
32 51 distance-based exercise intervention for PH patients
- 33  
34  
35 52 • The intervention is pragmatic and scalable and could be integrated into existing  
36  
37 53 healthcare pathways
- 38  
39  
40 54 • As PH is a rare disease with a small population size within Ireland, there is a lack of a  
41  
42 55 usual care control group which is a limitation of the study
- 43  
44  
45  
46 56

## PHAHB Intervention Feasibility Study Protocol

**57 INTRODUCTION**

58           Despite earlier diagnosis and improved pharmaceutical therapies, many PH participants  
59 continue to experience exertional symptoms of dyspnoea and fatigue, which leads to a  
60 reduction in functional capacity and in turn, QoL. Consequently, there is greater recognition  
61 for a more holistic approach to PH treatment beyond pharmacological therapies[1].

62           Exercise rehabilitation and physical activity (PA) interventions have continuously  
63 demonstrated effectiveness as adjuvant therapies for improving exercise capacity and QoL in  
64 a spectrum of cardio-pulmonary disorders[2-5]. Although research investigating exercise in PH  
65 is an emerging field of study, the body of evidence regarding its efficacy continues to grow.  
66 Recent systematic reviews and meta-analyses have reported improvements in exercise capacity  
67 and QoL in PH [6-11], which has prompted a renewed focus on exercise training and  
68 pulmonary rehabilitation for PH patients.

69           In the 2015, the European Society of Cardiology /European Respiratory Society  
70 recommended that exercise training should be implemented by specialist PH centres as an  
71 adjunct to medical therapy for stable PH participants [12]. Currently, the optimal mode,  
72 intensity, and duration of exercise training, and the characteristics of participants most likely  
73 to benefit from exercise training are poorly understood [13]. To date, the centre-based  
74 Heidelberg rehabilitation programme remains the gold standard exercise programme in PH. It  
75 involves an intensive 3-week in-patient induction phase, with a continued multimodality,  
76 monitored outpatient period [14]. Despite improvements in exercise capacity, muscle function,

## PHAHB Intervention Feasibility Study Protocol

1  
2  
3  
4 77 QoL and pulmonary haemodynamics, the initial in-patient phase is resource intensive to  
5  
6  
7 78 operate and roll out [15].  
8  
9  
10

11 79 An alternative and pragmatic approach, found to be as effective as a supervised exercise  
12  
13  
14 80 programme in cardiac rehabilitation, is a home-based model of delivery [16]. Home-based  
15  
16  
17 81 interventions also provide solutions to common barriers to participation in centre-based  
18  
19  
20 82 programmes such as access and transport issues, and are less expensive [17]. Further, patient  
21  
22  
23 83 populations, including PH [18] express a preference for unsupervised, self-paced, low-  
24  
25  
26 84 moderate intensity PA, specifically walking [19-20]. Through the use of telehealth, distance-  
27  
28  
29 85 based programmes could potentially offer an alternative mode of delivery for exercise training  
30  
31  
32 86 to increase adherence, availability and affordability for PH patients.  
33

34 87 Although the few studies examining the beneficial effects of home-based exercise  
35  
36  
37 88 training in PH are promising [21-22] none included strategies to maximise adherence. An  
38  
39  
40 89 evidence-based approach to implement lifestyle changes requires the implementation of health  
41  
42  
43 90 behaviour change strategies grounded in behaviour change theory [23]. Evidence-based  
44  
45  
46 91 behaviour change techniques (BCT's) can be used to improve intervention effectiveness [24].  
47  
48  
49 92 For example, the combination of the following BCT's: self-monitoring; goal setting; providing  
50  
51  
52 93 feedback on performance; and, review of behaviour goals, is associated with increased  
53  
54  
55 94 intervention effectiveness in PA interventions [25]. Interventions that meet the support needs  
56  
57  
58 95 and offer opportunities for self-monitoring have been found to be effective for improving PA  
59  
60 96 in other chronic disease groups [26]. Wearable technology holds great potential as an easy to  
97 use, low cost self-monitoring tool with continuous feedback [27] and are perceived as

## PHAHB Intervention Feasibility Study Protocol

1  
2  
3  
4 98 acceptable and useful for individuals with chronic diseases [28]. Through the use of telehealth,  
5  
6  
7 99 distance-based programmes could potentially offer an alternative mode of delivery for exercise  
8  
9  
10 100 training to increase adherence, availability and affordability for PH patients. The aim of this  
11  
12 101 study is to assess the feasibility, acceptability, utility and safety of a novel home-based exercise  
13  
14 102 training programme for PH patients.

19 103 **METHODS AND ANALYSIS**22 104 **Study Design**

25 105 The study will employ a single group pre-post-intervention design with a follow-up  
26  
27 106 maintenance phase. The purpose of the maintenance phase is to assess if the intervention  
28  
29  
30 107 facilitates the adoption of independent exercise in participants when formal support is removed.  
31  
32  
33 108 The study will adhere to the Standard Protocol Items: Recommendations for Interventional  
34  
35 109 Trials Reporting Template (SPIRIT)[29]. Participants will complete assessments at baseline  
36  
37 110 (T1), after the 10-week intervention (T2) and at 20-weeks follow up (T3).

43 112 **Eligibility Criteria**

46 113 Inclusion criteria are male or female > 18 years, with a diagnosis of PH (WHO Groups  
47  
48 114 I and IV) by right heart catheterisation showing baseline mean pulmonary arterial pressure  $\geq 25$   
49  
50  
51 115 mm Hg, pulmonary vascular resistance  $\geq 240$  dyne s cm<sup>-5</sup>, pulmonary capillary wedge pressure  
52  
53  
54 116  $\leq 15$  mmHg and receiving optimized conventional PH therapy. Participants must be clinically  
55  
56 117 stable with no medication changes in the 2 months prior to enrolment.

## PHAHB Intervention Feasibility Study Protocol

1  
2  
3  
4 118 Exclusion criteria include PH of any cause other than outlined in the inclusion criteria such as  
5  
6  
7 119 PH from left heart disease or lung disease/hypoxia (WHO Groups II and III), pregnancy, signs  
8  
9 120 of right heart decompensation, acute infection and pyrexia, change in disease-targeted therapy  
10  
11 121 within the last 2-months, scheduled to receive an investigational drug during the course of the  
12  
13 122 study, FEV1/FVC <0.5, total lung capacity <70% of the normal value, active liver disease,  
14  
15 123 porphyria, elevations of serum transaminases >3 x upper limit of normal (ULN), bilirubin >1.5  
16  
17 124 x ULN, haemoglobin concentration <75% of the lower limit of normal, systolic blood pressure  
18  
19 125 <85 mmHg, active myocarditis, unstable angina pectoris, exercise induced ventricular  
20  
21 126 arrhythmias, decompensated heart failure, hypertrophic obstructive cardiomyopathy or  
22  
23 127 impaired left ventricular function.  
24  
25  
26  
27  
28  
29  
30 128

**129 Participant Recruitment**

31  
32  
33  
34  
35 130 Participants will be recruited from the Pulmonary Hypertension Unit at the Mater  
36  
37 131 Misericordiae University Hospital, Dublin, Ireland. Eligible participants will be invited to  
38  
39 132 participate during their routine 3-6-month clinic visit. They will be given a verbal explanation  
40  
41 133 of the study and provided with an information sheet by their PH Specialist (SG/BMC) or a  
42  
43 134 member of their clinical team. After receiving the information, potential participants will have  
44  
45 135 the option to speak on the day to a member of the research team or to receive a follow-up phone  
46  
47 136 call within 1-2 days. Participants will have the opportunity to ask questions and will have time  
48  
49 137 to consider their participation. Written consent will be obtained by mail.  
50  
51  
52  
53  
54  
55  
56 138



## PHAHB Intervention Feasibility Study Protocol

139 **Sample Size**

140 Pilot study sample size typically ranges from 24 to 50 [30-32]. We estimate a target  
141 sample size of 25 to be sufficient for this feasibility study [31].

142 **Primary Outcomes**

143 **Feasibility:** Assessed by participant recruitment (enrolment as a proportion of eligible  
144 participants) and retention (proportion that completed all assessments); (ii) engagement with  
145 the intervention measured according to attendance at induction sessions and health coaching  
146 sessions and adherence, defined as the percentage of home-based exercise sessions recorded  
147 by participants who complete the intervention assessed via log books and weekly calls) and  
148 (iii) by examining delivery as intended (as per protocol) and health coach perceptions  
149 concerning how patients' received the intervention components. This will be captured  
150 immediately after each session in order to keep a record of how delivery was received in  
151 relation to the planned delivery (e.g., if a participants required extra time or further support  
152 following the induction training session).

153 **Acceptability and utility:** Assessed through self-report questionnaires completed at T2 and  
154 interviews. The questionnaire will assess participant perceptions of intervention  
155 appropriateness, effectiveness, quality, accessibility/usability, intrusiveness, and overall  
156 enjoyment and attitude towards the intervention. Semi-structured interviews with a sub-set of  
157 participants (~ n=12) will be conducted within 2-weeks of completing the T2 assessment. The  
158 interviews will further explore acceptability and utility of the intervention including  
159 perceptions concerning exercise prescription, adherence to different components of the  
160 intervention, in addition to the facilitating and hindering factors to participation. Participants

## PHAHB Intervention Feasibility Study Protocol

1  
2  
3  
4 161 will also be asked to offer suggestions for improvement and implementation. Interviews will  
5  
6  
7 162 be conducted via telephone or online platforms (i.e., Zoom) and will be audio-recorded and  
8  
9 163 transcribed.

10  
11  
12 164 **Safety:** Participants will be instructed to inform researchers immediately of any adverse  
13  
14 165 advent. In addition, participants will be questioned about adverse events directly related to  
15  
16 166 participation in the exercise intervention during a bi-weekly support call.  
17  
18  
19

20 167

21  
22  
23  
24 168 **Secondary Outcomes**

25  
26 169 **Exercise capacity:** Assessed using the 6-min walk test (6MWT). The test will be administered  
27  
28 170 according to the European Respiratory Society/ American Thoracic Society technical standard  
29  
30 171 Guidelines [33] and will be conducted at home using detailed step-by-step video and written  
31  
32 172 instructions and remotely supervised via phone/teleconferencing by a researcher (CMC). A  
33  
34 173 family member/friend will assist with conducting the test, including measuring blood pressure  
35  
36 174 and SpO<sub>2</sub> with guidance from the researcher before and after the test. The Frontier X heart rate  
37  
38 175 monitor will be worn during the test to provide real-time feedback. The assistant will ask the  
39  
40 176 participant to call out their SpO<sub>2</sub> and HR at each minute of the test. Subjective symptoms of  
41  
42 177 dyspnoea and fatigue will be recorded using the Modified Borg Scale (0-10) [34] before and  
43  
44 178 after the test. Standard encouragement will be delivered by the assistant, with researcher  
45  
46 179 prompting, if needed.  
47  
48  
49  
50  
51  
52

53  
54 180  
55  
56  
57  
58  
59  
60

## PHAHB Intervention Feasibility Study Protocol

1  
2  
3  
4 181 **Muscular strength:** Lower body muscle strength will be assessed using the 30-sec sit-to-stand  
5  
6  
7 182 test (STS) from a seat height of 40-45 cm. The STS is a commonly used field-based measure  
8  
9  
10 183 of functional lower limb muscle strength, particularly in clinical and elderly populations. The  
11  
12 184 test will be conducted in each participant's home via teleconference. A researcher (CMC) will  
13  
14 185 provide a demonstration, time the test, and count the repetitions. Each participant will perform  
15  
16  
17 186 two trials separated by 5-min, with the best score being recorded.  
18  
19  
20 187

21  
22  
23 188 **Physical activity behaviour:** ActivPAL<sup>3</sup> micro activity monitors (PAL Technologies Ltd.  
24  
25 189 Glasgow, Scotland) will be used to assess free living activity behaviour. The device samples  
26  
27  
28 190 at 20Hz for 15-sec epochs and measures bodily accelerations using triaxial accelerometer. An  
29  
30 191 inbuilt inclinometer measures thigh inclination. Proprietary algorithms classifies activities into  
31  
32 192 sitting/lying time, standing time, stepping time, step count and activity counts. Participants will  
33  
34  
35 193 be mailed the accelerometer together with detailed wear instruction and provided with a  
36  
37  
38 194 prepaid postage envelope to return the device. They will be instructed to wear the device on  
39  
40 195 the anterior aspect of their right thigh continuously for 7-days, except during water immersion  
41  
42  
43 196 activities (i.e., swimming and bathing). The ActivPAL is a valid and reliable measure of  
44  
45 197 activity and sedentary behaviour [35-36].  
46  
47  
48 198

### 199 **Psychological Outcomes and Mediators**

50  
51  
52  
53  
54 200 **Quality of life:** The Medical Outcomes Study Short-Form 36-Item Survey (SF-36) is a well-  
55  
56  
57 201 validated, generic questionnaire [37] consisting of physical functioning, physical role  
58  
59 202 functioning, bodily pain, and general health and the four mental subscales of vitality, social  
60

## PHAHB Intervention Feasibility Study Protocol

1  
2  
3  
4 203 functioning, emotional role functioning and mental health. The Cambridge Pulmonary  
5  
6 204 Hypertension Outcome Review (CAMPHOR)[38] was designed as a disease-specific health-  
7  
8  
9 205 related QoL measure for PH patients. It is widely used as a clinical and research tool in PH and  
10  
11 206 assess symptoms (25 items) functioning (15 items) and quality life (25 items).

12  
13  
14 207 **Fatigue:** The Fatigue Severity Scale (FSS)[39] measures the patient's perception of the  
15  
16 208 influence of fatigue on physical and social functioning through responses to nine different  
17  
18 209 physical and social functioning situations. The FSS is a valid tool for assessing fatigue across  
19  
20 210 various health conditions[40].

21  
22 211 **Self-regulatory self-efficacy for exercise:** Assessed using a modified 11-item scale [41-42],  
23  
24 212 which provide information on task, scheduling and recovery self-efficacy. Questions begin  
25  
26 213 with the stem "*How confident are you that you can...*" and include items such as "*plan exercise*  
27  
28 214 *sessions that will be at least moderately difficult (e.g. have you breathing a little hard, your*  
29  
30 215 *heart rate increases)?*". Participants rate their confidence on a 0-10 Likert scale, with a higher  
31  
32 216 score indicating greater self-efficacy for exercise (Cronbach alpha,  $\alpha = .951$ ).

33  
34 217 **Intentions to exercise:** Two items will measure intention to engage in moderate-intensity  
35  
36 218 physical activity for 150-min/week in the next 10-weeks, based on previously established  
37  
38 219 measures[43].

39  
40 220 **Outcome expectations:** Ten-items will assess outcome expectations. Five-items are derived  
41  
42 221 from the validated exercise pros subscale [44] and 5-items to assess outcomes related to  
43  
44 222 common symptoms reported in PH, 'such as breathlessness' [45].

45  
46 223 **Social support:** Social support for exercise from family and friends scale [46] uses a 20-item  
47  
48 224 scale to assess support from family and friends respectively. Responses will be recorded on a

## PHAHB Intervention Feasibility Study Protocol

225 Likert scale of 1-5, with higher scores representing greater social support. (Cronbach alpha,  
226 family  $\alpha = .926$ , friends  $\alpha = .921$ ).

227

228 Outcome assessments will take place at baseline (T1), after the 10-week intervention (T2) and  
229 at 20-weeks follow up (T3). Semi-structured interviews will be conducted at T2 to assess  
230 patient's perspective on programme acceptability and feasibility and at T3 to assess the follow  
231 up phase. Table 1 outlines the timeline of the assessments.

### 232 Procedure

233 Participants will complete all assessments, induction training and exercise training in  
234 their own home and will maintain in contact with researchers via telecommunication  
235 technologies (phone, videoconferencing and email). Following consent, a baseline assessment  
236 will be conducted (see Table 1) and participants will be provided with an accelerometer to  
237 record their activity for the following week. The assessment procedure will be repeated at T2  
238 (10-weeks) and T3 (20-weeks).

239 Participants will be provided with a home exercise bike (NordicTrack GX 2.7U), a wearable  
240 tracker watch (The Fitbit Charge 3), pulse oximeter (SafeHeart SpO<sub>2</sub> monitor), real time single  
241 lead ECG/HR/respiratory rate monitor (Frontier X), blood pressure monitor (Beurer BM44), a  
242 TheraBand, exercise manual, exercise diary and access to online videos. The exercise manual  
243 was partly based on the design of previous PA intervention in chronic disease - PPARCS [27]  
244 and WATTAP [47] trials and also our formative research with PH patients. The formative  
245 research highlighted the lack of understanding of the benefits of exercise, the importance of  
246 self-regulation strategies to support motivation and exercise engagement and the desire for

## PHAHB Intervention Feasibility Study Protocol

1  
2  
3  
4 247 visual picture and instruction of exercise. Concerns of breathlessness and energy management  
5  
6  
7 248 were also evident in interviews with PH patients and integrated into the exercise manual. The  
8  
9 249 manual offers a comprehensive, patient-friendly resource detailing; 1) general information  
10  
11 250 about the study; 2) useful links and contacts; 3) background information on PH; 4) education  
12  
13  
14 251 regarding exercise safety and the benefits of physical activity; 5) workbook style sections on  
15  
16 252 motivation, goal setting, overcoming barriers and psychosocial support; 6) managing  
17  
18 253 breathlessness; 7) exercise intensity and limits; 8) guided home exercises with written and  
19  
20 254 visual details and advice on progression; and 9) advice on pacing and energy conservation.  
21  
22  
23  
24 255 Participants will receive video clips of a qualified exercise specialist performing the exercises.  
25  
26 256 Participants will be encouraged to refer to the video to ensure adherence to correct technique.  
27  
28  
29 257 Online videos will provide a visual demonstration of each exercise. Participants will be  
30  
31 258 provided with an exercise diary as a tool to record their activity and effort perception. BCTs  
32  
33 259 will be integrated in the intervention through wearable technology devices, the use of print and  
34  
35 260 visual materials and health coaching and support calls.  
36  
37  
38  
39 261 The 10-week intervention consists of the following components: Three 60-90 min induction  
40  
41 262 sessions (week 0 and 1), up to five 30-min support health coaching sessions (at week 2, 3, 5,  
42  
43 263 7, 9) and 3-5 weekly home-based exercise sessions. The intervention will end prior to T2  
44  
45 264 assessment. Participants will continue to have access to the exercise manual, bike and Fitbit  
46  
47  
48 265 during the maintenance phase.  
49  
50  
51  
52  
53 266  
54  
55  
56 267  
57  
58  
59 268  
60

## PHAHB Intervention Feasibility Study Protocol

269 ***Induction Training***

270 Induction training (1:1), via video conferencing, is a key component to ensure patients  
271 are confident to exercise at home and understand the appropriate exercise intensity and how to  
272 exercise safely. Participants will be encouraged to involve a family member, friend or carer in  
273 the induction training. The sessions will focus on the following topics:

274 *Session 1 - Introduction*; Education on PH and benefits of PA for PH. Familiarisation with  
275 intervention materials/equipment and self-monitoring.

276 *Session 2 - Exercise Safety and Exercise Demonstration*; The session will focus on recognizing  
277 exercise limits, warning signs, and managing exercise intensity. Visual demonstrations of  
278 breathing techniques and aerobic, strength, and respiratory training will be provided, with the  
279 opportunity for behavioural practice during the session to check technique and instil  
280 confidence.

281 *Session 3 - Recap*; Exercise demonstrations and key safety points will be reviewed. Any issues  
282 regarding intervention materials/equipment will be addressed and participant goals will be  
283 reviewed, alongside additional tips for family/friend support and motivation.

284

285 ***Health Coaching Sessions***

286 The health coaching sessions (via videoconferencing) will use BCTs to foster exercise  
287 adherence, motivate and provide support. Over the 5 sessions the topics will include; benefits  
288 of exercise, goal setting, action planning, self-monitoring, identification and management of  
289 barriers to exercise, problem solving and feedback on behaviour, with the option for

## PHAHB Intervention Feasibility Study Protocol

290 participants to complete formal paperwork in the intervention manual. If required, additional  
291 support will be available outside of scheduled sessions.

292 Participants will be encouraged to wear the Fitbit Charge 3 daily during the intervention. The  
293 Fitbit data will be used to guide individually tailored goals, assess adherence to exercise and  
294 overall daily PA and as tool to provide feedback to the researcher and participants.

295

296 ***Exercise Programme***

297 Participants will complete a 10-week individualised, home-based exercise programme.

298 The programme will be prescribed using the FITT principle (Frequency, Intensity, Time and

299 Type) and will employ a multimodal approach that integrates aerobic, resistance and

300 respiratory training. The goals for each component are outlined in the sections below. These

301 are aspirational goals that may not be realistic for all participants. Exercise prescription will

302 be individualized based on their baseline PA levels, 6-min walk test distance (6MWD) and

303 physical capabilities. The modified Borg rating of perceived exertion (RPE) scale [48] will be

304 used to help prescribe exercise intensity. The RPE scale is a psychophysiological measurement

305 that translates physical stimuli to a psychological construct of perceived exertion and has been

306 validated in other clinical groups [49]. Participants will aim to achieve an RPE of 3 (moderate)

307 initially. Based on individual progress an RPE of 4 (somewhat hard) may be advised for some

308 participants. The exercise programme will include:

309 *Aerobic Training*; Participants will initially aim to undertake a minimum of 10-min of

310 structured aerobic exercise involving walking, cycling or a combination on  $\geq 3$  d/week.

311 Participants will be allowed to perform this exercise in a single bout, or accumulate it in bouts



## PHAHB Intervention Feasibility Study Protocol

of at least 5-min in duration. The duration will be progressively increased, with the goal of accumulating  $\geq 30$  min on  $\geq 5$  d/week.

*Resistance Training;* Participants will initially undertake resistance training on 2 d/week, involving a single set of 6-8 repetitions of upper and lower extremity and whole body exercises. Training volume will progressively increase with the goal of completing 2-3 sets of 10-12 reps of 4-6 exercises on three non-consecutive days. Participants will use pursed lip breathing to help airways stay open during exhalation. Bodyweight resistance will be used initially and based on individual ability, TheraBands, water bottles or light dumbbells will be introduced.

*Respiratory Training;* Participants will initially perform 10-min of respiratory training at least twice a week, which will follow the protocol established by the Heidelberg PH research group [50]. This involves a combination breathing techniques (e.g., pursed lip, diaphragmic and slow breathing) emphasising control over their rate of inspiration to expiration and to strengthen the diaphragm, stretching of the chest and thoracic muscles (e.g., cat-to-cow) and respiratory muscle strengthening exercises. Training volume will progressively increase with the goal of completing 15/20 min of accumulated respiratory training on  $\geq 3$  d/week. The intensity of the respiratory muscle strengthening exercises can be progressed using a TheraBand.

Participants will wear a Frontier X device (receiver attached to a strap placed around the chest) during exercise sessions. The first 2-weeks will be monitored by researchers and then periodically monitored. This will allow access to real time ECG, heart rate (HR), respiratory rate and cadence. Oxygen saturation will be monitored and participants will be instructed to stop exercising if the SpO<sub>2</sub> value drops below 88%, as per guidelines[51]. Participants will document any adverse events and report to the research team immediately.

## PHAHB Intervention Feasibility Study Protocol

334

**335 Data Management and Timeline**

336 The trial will be overseen by the trial management group, consisting the principal  
337 investigator, the trial-coordinator and health coach. They will meet every 4-weeks and will  
338 oversee all aspects of the conduct of the trial including performing safety oversight activities.  
339 Individual data will be de-identified, coded and entered. Each participant will be assigned a  
340 personal identification code (PIC), which will be used on all case report forms and in all  
341 electronic databases. Prior to any statistical analysis, all variables will be checked for missing,  
342 impossible and improbable values. Impossible and improbable values will be defined by  
343 clinical opinion and will include values that are outside three standard deviations of the mean  
344 value. Study recruitment began at the end of September 2020 and the study is expected to be  
345 completed in July 2021.

346

**347 Statistical Analysis**

348 Statistical analysis of quantitative data will be performed using SPSS Version 24. Prior  
349 to statistical analysis, the Shapiro-Wilks test will be applied to check for normality. Continuous  
350 variables will be reported as mean (range), mean (standard deviation) or median and inter-  
351 quartile range, depending on distribution, and categorical variables as frequency (%).  
352 Descriptive analyses will be undertaken to summarise participant characteristics and the  
353 quantitative data of the intervention feasibility, acceptability and utility. Qualitative data from  
354 post-trial interviews and researcher field notes will be analyzed using inductive thematic  
355 analysis to identify common themes[52]. A linear mixed model analysis (MMA) will be used

## PHAHB Intervention Feasibility Study Protocol

1  
2  
3  
4 356 to examine the impact of time in this study . A MMA is a suitable approach to modelling time  
5  
6 357 series data which contains repeated measures [53]. The MMA does not require complete data  
7  
8  
9 358 sets and does not exclude participants with missing data [54]. Furthermore, MMA has less  
10  
11 359 stringent assumptions than other repeated measures models (such as analysis of variance) and  
12  
13  
14 360 also exhibits increased power to detect treatment effects. The data will adjust for confounding  
15  
16  
17 361 variables, such as age, baseline line fitness, gender and PH group.

**362 Patient and Public Involvement**

21  
22  
23 363 Formative qualitative research took place with PH patients during the intervention  
24  
25 364 development stages. Semi-structured phone interviews (N=19) were conducted providing  
26  
27  
28 365 insight into patient barriers and motivators to PA, and exercise preferences. The findings fed  
29  
30 366 into the design of the intervention along with PH clinician input. A patient representative  
31  
32  
33 367 provided opinions on the study protocol, patient-facing documentation (e.g., participants  
34  
35 368 information sheet) and intervention material (e.g., exercise manual) to ensure it was patient  
36  
37  
38 369 friendly.

**370 Discussion**

41  
42  
43  
44  
45 371 The promise of exercise training in the treatment and management of PH has gained  
46  
47 372 significant interest over the past two decades. The observed positive effects of exercise  
48  
49  
50 373 programmes on patients' exercise capacity, functional capacity and QoL[55] make a strong  
51  
52 374 argument for the inclusion of exercise as an adjunctive therapy for stable PH patients[56].  
53  
54  
55 375 Considering that structured and resource-intensive hospital-based exercise programmes are  
56  
57 376 unlikely to be scalable, it is an opportune time to assess the efficacy, safety and impact of  
58  
59  
60 377 home-based programmes as an alternative mode of delivery for PH patients.

## PHAHB Intervention Feasibility Study Protocol

1  
2  
3  
4 378 A home-based exercise programme may eliminate many of the barriers associated with  
5  
6  
7 379 in-patients or out-patients setting such as transportation issues, location, long wait periods for  
8  
9 380 availability and accessibility for patients. A recent review of exercise interventions in PH by  
10  
11  
12 381 Ozemek and colleagues [56] highlighted the need for inclusion of home exercise programmes  
13  
14 382 to allow patients achieve the optimal 5 to 6 days of structured exercise.

15  
16  
17  
18 383 This study will utilise a remote delivery for exercise training with the use of telehealth  
19  
20 384 methods, wearable technology, performance feedback and behavioural support to deliver and  
21  
22  
23 385 monitor the intervention. The aim is to eliminate the burden on patients to attend several times  
24  
25 386 per week to an outpatient clinic, accommodate resource availability, make the programme  
26  
27  
28 387 achievable in a 'real world' setting and improve the reach beyond the traditional healthcare  
29  
30 388 facilities. The follow-up post intervention (T3) phase will provide insight into whether  
31  
32  
33 389 behavioural support is necessary in order for PH patients to remain physically active.  
34  
35 390 Furthermore, it will allow us to assess resource needs in future home-based exercise  
36  
37  
38 391 programmes such as the provision of specific exercise equipment and the use of ubiquitous,  
39  
40 392 low cost devices to monitor activity and safety (e.g. bike, wearable activity tracker). Remote  
41  
42  
43 393 assessment of outcomes may remove threats to external validity and evaluation of the  
44  
45 394 feasibility of such assessment will address the goals of implementation science to close the  
46  
47  
48 395 research-to-practice gap and support implementation and scale up of evidence-based  
49  
50 396 interventions[57].

51  
52  
53  
54 397 To our knowledge, this will be the first study to employ the use of evidence-based BCTs  
55  
56 398 to examine the feasibility, utility and efficacy of a remote home-based approach to exercise  
57  
58  
59 399 training for medically stable PH patients. The secondary aims of this study are to evaluate  
60

## PHAHB Intervention Feasibility Study Protocol

1  
2  
3  
4 400 whether this approach leads to improvement in selected indices of physical and psychological  
5  
6  
7 401 health.

8  
9  
10 402 PH is a rare, debilitating condition with most clinics centralized and limited community  
11  
12 403 resources available. Telehealth holds significant potential to meet the growing support for  
13  
14  
15 404 exercise training to be included as an adjunct therapy by offering remote training and support,  
16  
17  
18 405 which is key to long-term implementation of exercise training for the PH population. It  
19  
20 406 provides a service that is more accessible and may potentially offer a more affordable enhanced  
21  
22  
23 407 level of care. Our current understanding is limited concerning the acceptability, feasibility and  
24  
25 408 utility of a home-based programme for stable PH patients. This study will help gain a valuable  
26  
27  
28 409 insight into this gap in knowledge.

29  
30  
31 410

32  
33  
34  
35 411 **Ethics and dissemination:** Ethics approval has been obtained from the Mater Misericordiae  
36  
37 412 Institutional Review Board REF:1/378/2032 and Dublin City University Research Ethics  
38  
39  
40 413 DCUREC/2018/246. A manuscript of the results will be submitted to a peer-reviewed journal  
41  
42 414 and results will be presented at conferences, community and consumer forums and hospital  
43  
44  
45 415 research conferences. Trial Registration: ISRCTN Registry: ISRCTN83783446. Protocol  
46  
47 416 version. 2.0

48  
49 417

50 418  
51  
52  
53  
54  
55  
56  
57  
58  
59  
60

## PHAHB Intervention Feasibility Study Protocol

419 **References**

- 420 1. Gaine S, McLaughlin V. Pulmonary arterial hypertension: tailoring treatment to risk  
421 in the current era. *Eur Respir Rev.* 2017;26(146):170095.  
422 doi:10.1183/16000617.0095-2017.
- 423 2. Taylor RS, Sagar VA, Davies EJ, et al. Exercise-based rehabilitation for heart  
424 failure. *Cochrane Database Syst Rev.* 2014;2014(4):CD003331.  
425 doi:10.1002/14651858.CD003331.pub4.
- 426 3. Buys R, Avila A, Cornelissen VA. Exercise training improves physical fitness in  
427 patients with pulmonary arterial hypertension: a systematic review and meta-analysis  
428 of controlled trials. *BMC Pulm Med.* 2015;15:40. doi:10.1186/s12890-015-0031-1.
- 429 4. Langer D, Hendriks E, Burtin C, et al. A clinical practice guideline for physiotherapists  
430 treating patients with chronic obstructive pulmonary disease based on a systematic  
431 review of available evidence. *Clin Rehabil.* 2009;23(5):445-462.  
432 doi:10.1177/0269215509103507.
- 433 5. Vanhees L, Rauch B, Piepoli M, et al. Importance of characteristics and modalities of  
434 physical activity and exercise in the management of cardiovascular health in  
435 individuals with cardiovascular disease (Part III). *Eur J Prev Cardiol.*  
436 2012;19(6):1333-1356. doi:10.1177/2047487312437063.
- 437 6. Morris NR, Kermeen FD, Holland AE. Exercise-based rehabilitation programmes for  
438 pulmonary hypertension. *Cochrane Database Syst Rev.* 2017;1(1):CD011285..  
439 doi:10.1002/14651858.CD011285.pub2.
- 440 7. Dalla Vecchia LA, Bussotti M. Exercise training in pulmonary arterial hypertension. *J*  
441 *Thorac Dis.* 2018;10(1):508-521. doi:10.21037/jtd.2018.01.90.
- 442 8. Babu AS, Padmakumar R, Maiya AG, Mohapatra AK, et al . Effects of Exercise  
443 Training on Exercise Capacity in Pulmonary Arterial Hypertension: A Systematic

## PHAHB Intervention Feasibility Study Protocol

- 1  
2  
3 444 Review of Clinical Trials. *Heart Lung Circ.* 2016;25(4):333-341.  
4  
5 445 doi:10.1016/j.hlc.2015.10.01.  
6  
7  
8 446 9. Yuan P, Yuan XT, Sun XY, et al. Exercise training for pulmonary hypertension: a  
9  
10 447 systematic review and meta-analysis. *Int J Cardiol.* 2015;178:142-146.  
11  
12 448 doi:10.1016/j.ijcard.2014.10.161.  
13  
14  
15 449 10. Pandey A, Garg S, Khunger M, et al. Efficacy and Safety of Exercise Training in  
16  
17 450 Chronic Pulmonary Hypertension: Systematic Review and Meta-Analysis. *Circ Heart*  
18  
19 451 *Fail.* 2015;8(6):1032-1043. doi:10.1161/CIRCHEARTFAILURE.115.00.  
20  
21 452 11. Benjamin N, Marra AM, Eichstaedt C, Grünig E. Exercise Training and Rehabilitation  
22  
23 453 in Pulmonary Hypertension. *Heart Fail Clin.* 2018;14(3):425-430.  
24  
25 454 doi:10.1016/j.hfc.2018.03.008.  
26  
27  
28 455 12. Galiè N, Humbert M, Vachiery JL, et al. 2015 ESC/ERS Guidelines for the diagnosis  
29  
30 456 and treatment of pulmonary hypertension: The Joint Task Force for the Diagnosis and  
31  
32 457 Treatment of Pulmonary Hypertension of the European Society of Cardiology (ESC)  
33  
34 458 and the European Respiratory Society (ERS). *Eur Respir J.* 2015;46(4):903-975.  
35  
36 459 doi:10.1183/13993003.01032-2015.  
37  
38  
39 460 13. Galiè N, Corris PA, Frost A, et al. Updated treatment algorithm of pulmonary arterial  
40  
41 461 hypertension. *J Am Coll Cardiol.* 2013;62(25 Suppl):D60-D72.  
42  
43 462 doi:10.1016/j.jacc.2013.10.031.  
44  
45  
46 463 14. Mereles D, Ehlken N, Kreuzer S, et al. Exercise and respiratory training improve  
47  
48 464 exercise capacity and quality of life in patients with severe chronic pulmonary  
49  
50 465 hypertension. *Circulation.* 2006;114(14):1482-1489.  
51  
52 466 doi:10.1161/CIRCULATIONAHA.106.618397.  
53  
54  
55 467 15. Babu AS, Padmakumar R, Maiya AG, et al. Letter by Babu et al Regarding Article,  
56  
57 468 "Advances in Therapeutic Interventions for Patients With Pulmonary Arterial  
58  
59  
60

## PHAHB Intervention Feasibility Study Protocol

- 1  
2  
3 469 Hypertension". *Circulation*. 2015;132(12):e153. doi:  
4  
5 470 10.1161/CIRCULATIONAHA.114.014978.  
6  
7  
8 471 16. Buckingham SA, Taylor RS, Jolly K, et al. Home-based versus centre-based cardiac  
9  
10 472 rehabilitation: abridged Cochrane systematic review and meta-analysis. *Open Heart*.  
11  
12 473 2016;3(2):e000463. doi:10.1136/openhrt-2016-000463.  
13  
14 474 17. Hardcastle SJ, & Cohen PA. Effective physical activity promotion to survivors of  
15  
16 475 cancer is likely to be home based and to require oncologist participation. *J Clin Oncol*  
17  
18 476 2017;35:3635-3637. doi: 10.1200/JCO.2017.74.6032.  
19  
20 477 18. Chia KSW, Brown K, Kotlyar E, et al.. 'Tired, afraid, breathless ... .' An international  
21  
22 478 survey of the exercise experience for people living with pulmonary hypertension. *Pulm*  
23  
24 479 *Circ*. 2020 Nov 16;10(4):2045894020968023. doi: 10.1177/2045894020968023.  
25  
26 480 19. Maxwell-Smith C, Zeps N, Hagger MS, et al. Barriers to physical activity participation  
27  
28 481 in colorectal cancer survivors at high risk of cardiovascular disease. *Psycho-oncology*  
29  
30 482 2017;26:808-814. doi:10.1002/pon.4234.  
31  
32 483 20. Artinian NT, Fletcher GF, Mozaffarian D, et al. Interventions to promote physical  
33  
34 484 activity and dietary lifestyle changes for cardiovascular risk factor reduction in adults:  
35  
36 485 a scientific statement from the American Heart Association. *Circulation*.  
37  
38 486 2010;122(4):406-441. doi:10.1161/CIR.0b013e3181e8edf1.  
39  
40 487 21. Karapolat H, Çınar ME, Tanıgör G, et al. Effects of cardiopulmonary rehabilitation on  
41  
42 488 pulmonary arterial hypertension: A prospective, randomized study. *Turk J Phys Med*  
43  
44 489 *Rehabil*. 2019;65(3):278-286. doi: 10.5606/tftrd.2019.2758.  
45  
46 490 22. Babu AS, Padmakumar R, Nayak K, et al. Effects of home-based exercise training on  
47  
48 491 functional outcomes and quality of life in patients with pulmonary hypertension: A  
49  
50 492 randomized clinical trial. *Indian Heart J*. 2019;71(2):161-165.  
51  
52 493 doi:10.1016/j.ihj.2019.03.002.  
53  
54  
55  
56  
57  
58  
59  
60



## PHAHB Intervention Feasibility Study Protocol

- 1  
2  
3 494 23. Michie S, van Stralen MM, West R. The behaviour change wheel: a new method for  
4  
5 495 characterising and designing behaviour change interventions. *Implement Sci.*  
6  
7 496 2011;6:42. Published 2011 Apr 23. doi:10.1186/1748-5908-6-42.
- 8  
9  
10 497 24. Samdal GB, Eide GE, Barth T, Williams G, Meland E. Effective behaviour change  
11  
12 498 techniques for physical activity and healthy eating in overweight and obese adults;  
13  
14 499 systematic review and meta-regression analyses. *Int J Behav Nutr Phys Act.*  
15  
16 500 2017;14(1):42. Published 2017 Mar 28. doi:10.1186/s12966-017-0494-y.
- 17  
18  
19 501 25. Artinian NT, Fletcher GF, Mozaffarian D, et al. Interventions to promote physical  
20  
21 502 activity and dietary lifestyle changes for cardiovascular risk factor reduction in adults:  
22  
23 503 a scientific statement from the American Heart Association. *Circulation.*  
24  
25 504 2010;122(4):406-441. doi:10.1161/CIR.0b013e3181e8edf1.
- 26  
27  
28 505 26. Lahart I, Metsios G, Nevill AM, et al. Randomised controlled trial of a home-based  
29  
30 506 physical activity intervention in breast cancer survivors. *BMC Cancer* 2016; 16:234-  
31  
32 507 247. doi: 10.1186/s12885-016-2258-5.
- 33  
34  
35 508 27. Hardcastle SJ, Hince D, Jiménez-Castuera R, et al., Promoting physical activity in  
36  
37 509 regional and remote cancer survivors (PPARCS) using wearables and health coaching:  
38  
39 510 randomised controlled trial protocol  
40  
41 511 *BMJOpen* 2019;9:e028369. doi: 10.1136/bmjopen-2018-028369.
- 42  
43  
44 512 28. Mercer K, Giangregorio L, Schneider E, et al. Acceptance of commercially available  
45  
46 513 wearable activity trackers among adults aged over 50 and with chronic illness: a  
47  
48 514 mixed-methods evaluation. *JMIR Mhealth Uhealth* 2016;4: e7.  
49  
50 515 doi:10.2196/mhealth.4225.
- 51  
52  
53 516 29. Chan A, Tetzlaff JM, Altman DG, et al. SPIRIT 2013 statement: Defining standard  
54  
55 517 protocol items for clinical trials. *Annals of Internal Medicine* 2013;158:200-207.
- 56  
57  
58  
59  
60

## PHAHB Intervention Feasibility Study Protocol

- 1  
2  
3 518 30. Browne RH. On the use of a pilot sample for sample size determination. *Stat Med*.  
4  
5 519 1995;14(17):1933-1940. doi:10.1002/sim.4780141709.  
6  
7  
8 520 31. Julious SA: Sample size of 12 per group rule of thumb for a pilot study. *Pharm Stat*.  
9  
10 521 2005, 4 (4): 287-291. 10.1002/pst.185.  
11  
12 522 32. Sim J, Lewis M. The size of a pilot study for a clinical trial should be calculated in  
13  
14 523 relation to considerations of precision and efficiency. *J Clin Epidemiol*.  
15  
16 524 2012;65(3):301-308. doi:10.1016/j.jclinepi.2011.07.011.  
17  
18  
19 525 33. Holland AE, Spruit MA, Troosters T, et al. An official European Respiratory  
20  
21 526 Society/American Thoracic Society technical standard: field walking tests in chronic  
22  
23 527 respiratory disease. *Eur Respir J*. 2014;44(6):1428-1446.  
24  
25 528 doi:10.1183/09031936.00150314.  
26  
27  
28 529 34. Borg, G. A. V. (1982). Psychophysical bases of perceived exertion. *Medicine &*  
29  
30 530 *Science in Sports & Exercise*. 1982;14(5):377-381. [doi.10.1249/00005768-](https://doi.org/10.1249/00005768-198205000-0001)  
31  
32 531 [198205000-0001](https://doi.org/10.1249/00005768-198205000-0001).  
33  
34  
35 532 35. Harrington DM, Welk GJ, Donnelly AE. Validation of MET estimates and step  
36  
37 533 measurement using the ActivPAL physical activity logger. *J Sports Sci*.  
38  
39 534 2011;29(6):627-633. doi:10.1080/02640414.2010.549499.  
40  
41  
42 535 36. Kozey-Keadle S, Libertine A, Lyden K, et al. Validation of wearable monitors for  
43  
44 536 assessing sedentary behavior. *Med Sci Sports Exerc*. 2011;43(8):1561-1567.  
45  
46 537 doi:10.1249/MSS.0b013e31820ce174.  
47  
48  
49 538 37. Ware JE, Sherbourne CD. The MOS 36-Item Short-Form Health Survey (SF-36). I.  
50  
51 539 Conceptual framework and item selection. *Med Care* 1992;30:473-83.  
52  
53  
54 540 38. McKenna SP, Doughty N, Meads DM, Doward LC, Pepke-Zaba J. The Cambridge  
55  
56 541 Pulmonary Hypertension Outcome Review (CAMPHOR): a measure of health-related  
57  
58  
59  
60

## PHAHB Intervention Feasibility Study Protocol

- 1  
2  
3 542 quality of life and quality of life for patients with pulmonary hypertension. *Qual Life*  
4  
5 543 *Res.* 2006;15(1):103-115. doi:10.1007/s11136-005-3513-4.  
6  
7  
8 544 39. Krupp LB, LaRocca NG, Muir-Nash J, Steinberg AD. The Fatigue Severity  
9  
10 545 Scale: Application to Patients With Multiple Sclerosis and Systemic Lupus  
11  
12 546 Erythematosus. *Arch Neurol.* 1989;46(10):1121–1123.  
13  
14 547 doi:10.1001/archneur.1989.00520460115022.  
15  
16  
17 548 40. Schentag CT, Cichon J, MacKinnon A, Gladman DD, Urowitz MB. Validation and  
18  
19 549 normative data for the 0–10 point scale version of the fatigue severity scale  
20  
21 550 (FSS) [abstract]. *Arthritis Rheum* 2000; **43** Suppl: S177.  
22  
23  
24 551 41. Luszczynska, A., & Sutton, S. (2006). Physical activity after cardiac rehabilitation:  
25  
26 552 Evidence that different types of self-efficacy are important in maintainers and  
27  
28 553 relapsers. *Rehabilitation Psychology*, *51*(4), 314–321. doi. 10.1037/0090-  
29  
30 554 5550.51.4.314.  
31  
32  
33 555 42. Shields CA, Brawley LR. Preferring proxy-agency: impact on self-efficacy for  
34  
35 556 exercise. *J Health Psychol.* 2006 Nov;11(6):904-14. doi: 10.1177/1359105306069092.  
36  
37 557 PMID: 17035262.  
38  
39  
40 558 43. Ajzen I, Brown TC, & Carvajal F. Explaining the discrepancy between intentions and  
41  
42 559 actions: The case of hypothetical bias in contingent valuation. *Pers Soc Psychol Bull*  
43  
44 560 2004;30:1108-1121. doi:10.1177/0146167204264079.  
45  
46  
47 561 44. Plotnikoff RC, Blanchard CM, Hotz SB, et al. Validation of the decisional balance  
48  
49 562 scales in the exercise domain from the transtheoretical model: A longitudinal test.  
50  
51 563 *Meas Phys Educ Exerc Sci* 2001;5:191-206. doi:10.1207/S15327841MPEE0504\_01.  
52  
53  
54 564 45. Yorke J, Deaton C, Campbell M, et al. Symptom severity and its effect on health-  
55  
56 565 related quality of life over time in patients with pulmonary hypertension: a multisite  
57  
58  
59  
60

## PHAHB Intervention Feasibility Study Protocol

- 1  
2  
3 566 longitudinal cohort study. *BMJ Open Respiratory*  
4  
5 567  
6 *Research*. 2018;5:e000263. doi: 10.1136/bmjresp-2017-000263.  
7  
8 568 46. Sallis JF, Grossman RM, Pinski RB, Patterson TL, Nader PR. The development of  
9  
10 569 scales to measure social support for diet and exercise behaviors. *Prev Med*.  
11  
12 570 1987;16(6):825-836. doi:10.1016/0091-7435(87)90022-3.  
13  
14 571 47. Maxwell-Smith C, Cohen PA, Platell C, et al. Wearable Activity Technology And  
15  
16 572 Action-Planning (WATAAP) to promote physical activity in cancer survivors:  
17  
18 573 Randomised controlled trial protocol. *Int J Clin Health Psychol*. 2018;18(2):124-132.  
19  
20 574 doi:10.1016/j.ijchp.2018.03.003.  
21  
22 575 48. Foster C, Florhaug JA, Franklin J, et al. A new approach to monitoring exercise  
23  
24 576 training. *J Strength Cond Res*. 2001;15(1):109-115.  
25  
26 577 49. Rosales W, Cofré C, Alejandra C, et al. Validación de la escala de Borg en personas  
27  
28 578 con diabetes mellitus tipo 2 [Validation of the Borg scale in participants with type 2  
29  
30 579 diabetes mellitus]. *Rev Med Chil*. 2016;144(9):1159-1163. doi:10.4067/S0034-  
31  
32 580 98872016000900009.  
33  
34 581 50. Mereles D, Ehlken N, Kreuscher S, et al. Exercise and respiratory training improve  
35  
36 582 exercise capacity and quality of life in patients with severe chronic pulmonary  
37  
38 583 hypertension. *Circulation*. 2006;114(14):1482-9. doi:  
39  
40 584 10.1161/CIRCULATIONAHA.106.618397.  
41  
42 585 51. Spruit MA, Singh SJ, Garvey C, et al. An official American Thoracic  
43  
44 586 Society/European Respiratory Society statement: key concepts and advances in  
45  
46 587 pulmonary rehabilitation. *Am J Respir Crit Care Med*. 2013;188(8):e13-e64.  
47  
48 588 doi:10.1164/rccm.201309-1634ST.  
49  
50 589 52. Braun V, & Clarke V. Using thematic analysis in psychology. *Qualitative Research in*  
51  
52 590 *Psychology* 2006;3:2, 77-101. doi: 10.1191/1478088706qp063oa.  
53  
54  
55  
56  
57  
58  
59  
60

## PHAHB Intervention Feasibility Study Protocol

- 1  
2  
3 591 53. Haapalainen E, Laurinen P, Siirtola P, et al. Exercise energy expenditure estimation  
4  
5 592 based on acceleration data using the linear mixed model. *IEEE International*  
6  
7 593 *Conference on Information Reuse and Integration*. 2008: 131–136.  
8  
9  
10  
11 594 54. Armstrong R. A. Recommendations for analysis of repeated-measures designs: Testing  
12  
13 595 and correcting for sphericity and use of manova and mixed model analysis. *Ophthalmic*  
14  
15 596 *and Physiological Optics*. 2017: 37(5), 585–593.  
16  
17  
18 597 55. Dalla Vecchia LA, Bussotti M. Exercise training in pulmonary arterial hypertension. *J*  
19  
20 598 *Thorac Dis*. 2018;10(1):508-521. doi:10.21037/jtd.2018.01.90.  
21  
22  
23 599 56. Ozemek C, Berry MJ, Arena R. A Review of Exercise Interventions in Pulmonary  
24  
25 600 Arterial Hypertension and Recommendations for Rehabilitation Programming. *J*  
26  
27 601 *Cardiopulm Rehabil Prev*. 2019;39(3):138-145.  
28  
29 602 doi:10.1097/HCR.0000000000000402.  
30  
31  
32  
33 603 57. Eccles MP, Armstrong D, Baker R, et al. An implementation research  
34  
35 604 agenda. *Implement Sci*. 2009;4:18. Published 2009 Apr 7. doi:10.1186/1748-5908-4-  
36  
37 605 18.  
38  
39  
40  
41 606

42  
43  
44 607 **Contributors:** CMC, BK, SJH, NMC, SG, BMC, and NM were involved in study  
45  
46 608 conceptualisation, development of intervention content and writing of the protocol. AMC  
47  
48 609 provided guidance on the statistical analysis. CMC led the writing of the manuscript and all  
49  
50 610 authors edited and reviewed the manuscript.  
51  
52

53  
54  
55 611 **Funding:** This work was supported by Janssen Sciences Ireland UC. The funding body had no  
56  
57 612 role in the study design and data collection, analysis and interpretation of data.  
58  
59  
60

## PHAHB Intervention Feasibility Study Protocol

1  
2  
3  
4 613 **Competing interest statement:** None declared.  
5  
6  
7

8 614  
9

10  
11 615  
12  
13

14 616  
15  
16  
17

18 617  
19  
20  
21

22 618  
23  
24

25 619  
26  
27  
28

29 620  
30  
31

32 621 Table 1: Study outcome measures and time points  
33

| Assessments                            | Time             |                               |                   |
|----------------------------------------|------------------|-------------------------------|-------------------|
|                                        | Baseline<br>(T1) | Post-<br>Intervention<br>(T2) | Follow-up<br>(T3) |
| Written informed consent & eligibility | X                |                               |                   |
| Demographics                           | X                |                               |                   |
| Medical history                        | X                |                               |                   |
| WHO functional class                   | X                | X                             | X                 |

## PHAHB Intervention Feasibility Study Protocol

|                                                                    |   |   |   |
|--------------------------------------------------------------------|---|---|---|
| Concomitant medication                                             | X | X | X |
| Adverse events                                                     | X | X | X |
| Exercise capacity (6-MWT)                                          | X | X | X |
| Muscle strength (Sit to Stand)                                     | X | X | X |
| Physical activity (ActivPAL Micro)                                 | X | X | X |
| Quality of life (CAMPHOR & SF-36)                                  | X | X | X |
| Psychological constructs                                           | X | X | X |
| Intervention debrief questionnaires/<br>semi-structured interviews |   | X | X |

622



STANDARD PROTOCOL ITEMS: RECOMMENDATIONS FOR INTERVENTIONAL TRIALS

SPIRIT 2013 Checklist: Recommended items to address in a clinical trial protocol and related documents\*

| Section/item                      | Item No | Description                                                                                                                                                                                                                                                                                               |
|-----------------------------------|---------|-----------------------------------------------------------------------------------------------------------------------------------------------------------------------------------------------------------------------------------------------------------------------------------------------------------|
| <b>Administrative information</b> |         |                                                                                                                                                                                                                                                                                                           |
| Title                             | 1       | Descriptive title identifying the study design, population, interventions, and, if applicable, trial acronym <b>(Page 1)</b>                                                                                                                                                                              |
| Trial registration                | 2a      | Trial identifier and registry name. If not yet registered, name of intended registry <b>(Page 3)</b>                                                                                                                                                                                                      |
|                                   | 2b      | All items from the World Health Organization Trial Registration Data Set <b>(Page 3)</b>                                                                                                                                                                                                                  |
| Protocol version                  | 3       | Date and version identifier <b>(Page 3)</b>                                                                                                                                                                                                                                                               |
| Funding                           | 4       | Sources and types of financial, material, and other support <b>(Page 29)</b>                                                                                                                                                                                                                              |
| Roles and responsibilities        | 5a      | Names, affiliations, and roles of protocol contributors <b>(Title page and Page 29)</b>                                                                                                                                                                                                                   |
|                                   | 5b      | Name and contact information for the trial sponsor <b>(Page 29)</b>                                                                                                                                                                                                                                       |
|                                   | 5c      | Role of study sponsor and funders, if any, in study design; collection, management, analysis, and interpretation of data; writing of the report; and the decision to submit the report for publication, including whether they will have ultimate authority over any of these activities <b>(Page 29)</b> |
|                                   | 5d      | Composition, roles, and responsibilities of the coordinating centre, steering committee, endpoint adjudication committee, data management team, and other individuals or groups overseeing the trial, if applicable (see Item 21a for data monitoring committee) <b>(Page 29)</b>                         |
| <b>Introduction</b>               |         |                                                                                                                                                                                                                                                                                                           |
| Background and rationale          | 6a      | Description of research question and justification for undertaking the trial, including summary of relevant studies (published and unpublished) examining benefits and harms for each intervention <b>(Pages 5-7)</b>                                                                                     |
|                                   | 6b      | Explanation for choice of comparators <b>(Page 9)</b>                                                                                                                                                                                                                                                     |
| Objectives                        | 7       | Specific objectives or hypotheses <b>(Page 7)</b>                                                                                                                                                                                                                                                         |



1  
2  
3  
4  
5  
6  
7  
8  
9  
10  
11  
12  
13  
14  
15  
16  
17  
18  
19  
20  
21  
22  
23  
24  
25  
26  
27  
28  
29  
30  
31  
32  
33  
34  
35  
36  
37  
38  
39  
40  
41  
42  
43  
44  
45  
46  
47  
48  
49  
50  
51  
52  
53  
54  
55  
56  
57  
58  
59  
60

|              |   |                                                                                                                                                                                                                           |
|--------------|---|---------------------------------------------------------------------------------------------------------------------------------------------------------------------------------------------------------------------------|
| Trial design | 8 | Description of trial design including type of trial (eg, parallel group, crossover, factorial, single group), allocation ratio, and framework (eg, superiority, equivalence, noninferiority, exploratory) <b>(Page 7)</b> |
|--------------|---|---------------------------------------------------------------------------------------------------------------------------------------------------------------------------------------------------------------------------|

### **Methods: Participants, interventions, and outcomes**

|               |   |                                                                                                                                                                                                      |
|---------------|---|------------------------------------------------------------------------------------------------------------------------------------------------------------------------------------------------------|
| Study setting | 9 | Description of study settings (eg, community clinic, academic hospital) ( and list of countries where data will be collected. Reference to where list of study sites can be obtained <b>(Page 8)</b> |
|---------------|---|------------------------------------------------------------------------------------------------------------------------------------------------------------------------------------------------------|

|                      |    |                                                                                                                                                                                                         |
|----------------------|----|---------------------------------------------------------------------------------------------------------------------------------------------------------------------------------------------------------|
| Eligibility criteria | 10 | Inclusion and exclusion criteria for participants. If applicable, eligibility criteria for study centres and individuals who will perform the interventions (eg, surgeons, psychotherapists) <b>(7)</b> |
|----------------------|----|---------------------------------------------------------------------------------------------------------------------------------------------------------------------------------------------------------|

|               |     |                                                                                                                                                |
|---------------|-----|------------------------------------------------------------------------------------------------------------------------------------------------|
| Interventions | 11a | Interventions for each group with sufficient detail to allow replication, including how and when they will be administered <b>(Page 13-17)</b> |
|---------------|-----|------------------------------------------------------------------------------------------------------------------------------------------------|

|  |     |                                                                                                                                                                                                             |
|--|-----|-------------------------------------------------------------------------------------------------------------------------------------------------------------------------------------------------------------|
|  | 11b | Criteria for discontinuing or modifying allocated interventions for a given trial participant (eg, drug dose change in response to harms, participant request, or improving/worsening disease) <b>(N/A)</b> |
|--|-----|-------------------------------------------------------------------------------------------------------------------------------------------------------------------------------------------------------------|

|  |     |                                                                                                                                                                       |
|--|-----|-----------------------------------------------------------------------------------------------------------------------------------------------------------------------|
|  | 11c | Strategies to improve adherence to intervention protocols, and any procedures for monitoring adherence (eg, drug tablet return, laboratory tests) <b>(Page 13-17)</b> |
|--|-----|-----------------------------------------------------------------------------------------------------------------------------------------------------------------------|

|  |     |                                                                                                               |
|--|-----|---------------------------------------------------------------------------------------------------------------|
|  | 11d | Relevant concomitant care and interventions that are permitted or prohibited during the trial <b>(Page 8)</b> |
|--|-----|---------------------------------------------------------------------------------------------------------------|

|          |    |                                                                                                                                                                                                                                                                                                                                                                                                           |
|----------|----|-----------------------------------------------------------------------------------------------------------------------------------------------------------------------------------------------------------------------------------------------------------------------------------------------------------------------------------------------------------------------------------------------------------|
| Outcomes | 12 | Primary, secondary, and other outcomes, including the specific measurement variable (eg, systolic blood pressure), analysis metric (eg, change from baseline, final value, time to event), method of aggregation (eg, median, proportion), and time point for each outcome. Explanation of the clinical relevance of chosen efficacy and harm outcomes is strongly recommended <b>(Page 7 &amp; 9-13)</b> |
|----------|----|-----------------------------------------------------------------------------------------------------------------------------------------------------------------------------------------------------------------------------------------------------------------------------------------------------------------------------------------------------------------------------------------------------------|

|                      |    |                                                                                                                                                                                                   |
|----------------------|----|---------------------------------------------------------------------------------------------------------------------------------------------------------------------------------------------------|
| Participant timeline | 13 | Time schedule of enrolment, interventions (including any run-ins and washouts), assessments, and visits for participants. A schematic diagram is highly recommended (see Figure) <b>(table 1)</b> |
|----------------------|----|---------------------------------------------------------------------------------------------------------------------------------------------------------------------------------------------------|

|             |    |                                                                                                                                                                                                       |
|-------------|----|-------------------------------------------------------------------------------------------------------------------------------------------------------------------------------------------------------|
| Sample size | 14 | Estimated number of participants needed to achieve study objectives and how it was determined, including clinical and statistical assumptions supporting any sample size calculations <b>(Page 9)</b> |
|-------------|----|-------------------------------------------------------------------------------------------------------------------------------------------------------------------------------------------------------|

|             |    |                                                                                                     |
|-------------|----|-----------------------------------------------------------------------------------------------------|
| Recruitment | 15 | Strategies for achieving adequate participant enrolment to reach target sample size <b>(Page 8)</b> |
|-------------|----|-----------------------------------------------------------------------------------------------------|

### **Methods: Assignment of interventions (for controlled trials)**

Allocation:

|    |                |     |                                                                         |
|----|----------------|-----|-------------------------------------------------------------------------|
| 1  |                |     |                                                                         |
| 2  | Sequence       | 16a | Method of generating the allocation sequence (eg, computer-             |
| 3  | generation     |     | generated random numbers), and list of any factors for stratification.  |
| 4  |                |     | (To reduce predictability of a random sequence, details of any          |
| 5  |                |     | planned restriction (eg, blocking) should be provided in a separate     |
| 6  |                |     | document that is unavailable to those who enrol participants or assign  |
| 7  |                |     | interventions <b>(N/A)</b>                                              |
| 8  |                |     |                                                                         |
| 9  |                |     |                                                                         |
| 10 | Allocation     | 16b | Mechanism of implementing the allocation sequence (eg, central          |
| 11 | concealment    |     | telephone; sequentially numbered, opaque, sealed envelopes),            |
| 12 | mechanism      |     | describing any steps to conceal the sequence until interventions are    |
| 13 |                |     | <b>(N/A)</b>                                                            |
| 14 |                |     |                                                                         |
| 15 | Implementation | 16c | Who will generate the allocation sequence, who will enrol participants, |
| 16 |                |     | and who will assign participants to interventions <b>(N/A)</b>          |
| 17 |                |     |                                                                         |
| 18 |                |     |                                                                         |
| 19 | Blinding       | 17a | Who will be blinded after assignment to interventions (eg, trial        |
| 20 | (masking)      |     | participants, care providers, outcome assessors, data analysts), and    |
| 21 |                |     | how <b>(N/A)</b>                                                        |
| 22 |                |     |                                                                         |
| 23 |                | 17b | If blinded, circumstances under which unblinding is permissible, and    |
| 24 |                |     | procedure for revealing a participant's allocated intervention during   |
| 25 |                |     | the trial <b>(N/A)</b>                                                  |
| 26 |                |     |                                                                         |
| 27 |                |     |                                                                         |

### Methods: Data collection, management, and analysis

|    |                 |     |                                                                          |
|----|-----------------|-----|--------------------------------------------------------------------------|
| 28 |                 |     |                                                                          |
| 29 |                 |     |                                                                          |
| 30 | Data collection | 18a | Plans for assessment and collection of outcome, baseline, and other      |
| 31 | methods         |     | trial data, including any related processes to promote data quality (eg, |
| 32 |                 |     | duplicate measurements, training of assessors) and a description of      |
| 33 |                 |     | study instruments (eg, questionnaires, laboratory tests) along with      |
| 34 |                 |     | their reliability and validity, if known. Reference to where data        |
| 35 |                 |     | collection forms can be found, if not in the protocol <b>(Page9-13)</b>  |
| 36 |                 |     |                                                                          |
| 37 |                 |     |                                                                          |
| 38 |                 | 18b | Plans to promote participant retention and complete follow-up,           |
| 39 |                 |     | including list of any outcome data to be collected for participants who  |
| 40 |                 |     | discontinue or deviate from intervention protocols <b>(Page 13)</b>      |
| 41 |                 |     |                                                                          |
| 42 | Data            | 19  | Plans for data entry, coding, security, and storage, including any       |
| 43 | management      |     | related processes to promote data quality (eg, double data entry;        |
| 44 |                 |     | range checks for data values). Reference to where details of data        |
| 45 |                 |     | management procedures can be found, if not in the protocol <b>(Page</b>  |
| 46 |                 |     | <b>18)</b>                                                               |
| 47 |                 |     |                                                                          |
| 48 |                 |     |                                                                          |
| 49 | Statistical     | 20a | Statistical methods for analysing primary and secondary outcomes.        |
| 50 | methods         |     | Reference to where other details of the statistical analysis plan can be |
| 51 |                 |     | found, if not in the protocol <b>(Page 18)</b>                           |
| 52 |                 |     |                                                                          |
| 53 |                 |     |                                                                          |
| 54 |                 | 20b | Methods for any additional analyses (eg, subgroup and adjusted           |
| 55 |                 |     | analyses) <b>(Page 18)</b>                                               |
| 56 |                 |     |                                                                          |
| 57 |                 | 20c | Definition of analysis population relating to protocol non-adherence     |
| 58 |                 |     | (eg, as randomised analysis), and any statistical methods to handle      |
| 59 |                 |     | missing data (eg, multiple imputation) <b>(Page 18)</b>                  |
| 60 |                 |     |                                                                          |

## Methods: Monitoring

|                 |     |                                                                                                                                                                                                                                                                                                                                                          |
|-----------------|-----|----------------------------------------------------------------------------------------------------------------------------------------------------------------------------------------------------------------------------------------------------------------------------------------------------------------------------------------------------------|
| Data monitoring | 21a | Composition of data monitoring committee (DMC); summary of its role and reporting structure; statement of whether it is independent from the sponsor and competing interests; and reference to where further details about its charter can be found, if not in the protocol. Alternatively, an explanation of why a DMC is not needed ( <b>Page 18</b> ) |
|                 | 21b | Description of any interim analyses and stopping guidelines, including who will have access to these interim results and make the final decision to terminate the trial ( <b>N/A</b> )                                                                                                                                                                   |
| Harms           | 22  | Plans for collecting, assessing, reporting, and managing solicited and spontaneously reported adverse events and other unintended effects of trial interventions or trial conduct ( <b>Page 10</b> )                                                                                                                                                     |
| Auditing        | 23  | Frequency and procedures for auditing trial conduct, if any, and whether the process will be independent from investigators and the sponsor ( <b>Page 18</b> )                                                                                                                                                                                           |

## Ethics and dissemination

|                               |     |                                                                                                                                                                                                                                                     |
|-------------------------------|-----|-----------------------------------------------------------------------------------------------------------------------------------------------------------------------------------------------------------------------------------------------------|
| Research ethics approval      | 24  | Plans for seeking research ethics committee/institutional review board (REC/IRB) approval ( <b>Page 3</b> )                                                                                                                                         |
| Protocol amendments           | 25  | Plans for communicating important protocol modifications (eg, changes to eligibility criteria, outcomes, analyses) to relevant parties (eg, investigators, REC/IRBs, trial participants, trial registries, journals, regulators) ( <b>Page 18</b> ) |
| Consent or assent             | 26a | Who will obtain informed consent or assent from potential trial participants or authorised surrogates, and how (see Item 32) ( <b>Page 8</b> )                                                                                                      |
|                               | 26b | Additional consent provisions for collection and use of participant data and biological specimens in ancillary studies, if applicable ( <b>N/A</b> )                                                                                                |
| Confidentiality               | 27  | How personal information about potential and enrolled participants will be collected, shared, and maintained in order to protect confidentiality before, during, and after the trial ( <b>Page 18</b> )                                             |
| Declaration of interests      | 28  | Financial and other competing interests for principal investigators for the overall trial and each study site ( <b>Page 29</b> )                                                                                                                    |
| Access to data                | 29  | Statement of who will have access to the final trial dataset, and disclosure of contractual agreements that limit such access for investigators ( <b>Page 18</b> )                                                                                  |
| Ancillary and post-trial care | 30  | Provisions, if any, for ancillary and post-trial care, and for compensation to those who suffer harm from trial participation ( <b>N/A</b> )                                                                                                        |

- 1  
2  
3  
4  
5  
6  
7  
8  
9  
10  
11  
12  
13  
14
- |                         |     |                                                                                                                                                                                                                                                                                                     |
|-------------------------|-----|-----------------------------------------------------------------------------------------------------------------------------------------------------------------------------------------------------------------------------------------------------------------------------------------------------|
| Dissemination<br>policy | 31a | Plans for investigators and sponsor to communicate trial results to participants, healthcare professionals, the public, and other relevant groups (eg, via publication, reporting in results databases, or other data sharing arrangements), including any publication restrictions <b>(Page 3)</b> |
|                         | 31b | Authorship eligibility guidelines and any intended use of professional writers <b>(Page 29)</b>                                                                                                                                                                                                     |
|                         | 31c | Plans, if any, for granting public access to the full protocol, participant-level dataset, and statistical code <b>(Page 3)</b>                                                                                                                                                                     |

## 15 Appendices

- 16  
17  
18  
19  
20  
21  
22  
23  
24
- |                               |    |                                                                                                                                                                                                             |
|-------------------------------|----|-------------------------------------------------------------------------------------------------------------------------------------------------------------------------------------------------------------|
| Informed consent<br>materials | 32 | Model consent form and other related documentation given to participants and authorised surrogates <b>(Appendix A)</b>                                                                                      |
| Biological<br>specimens       | 33 | Plans for collection, laboratory evaluation, and storage of biological specimens for genetic or molecular analysis in the current trial and for future use in ancillary studies, if applicable <b>(N/A)</b> |

---

25 \*It is strongly recommended that this checklist be read in conjunction with the SPIRIT 2013  
26 Explanation & Elaboration for important clarification on the items. Amendments to the  
27 protocol should be tracked and dated. The SPIRIT checklist is copyrighted by the SPIRIT  
28 Group under the Creative Commons "[Attribution-NonCommercial-NoDerivs 3.0 Unported](https://creativecommons.org/licenses/by-nc-nd/3.0/)"  
29 license.  
30  
31  
32  
33  
34  
35  
36  
37  
38  
39  
40  
41  
42  
43  
44  
45  
46  
47  
48  
49  
50  
51  
52  
53  
54  
55  
56  
57  
58  
59  
60
